# Supplementary material for: Exploring the Diversity of the Human Blood Virome
Source: MDPI journal article supplement (doi:10.3390/v13112322), 2021-11-21

**Supplementary Figure S1. Global phylogenetic tree for the ORF1 of the three anellovirus genera.** Downloaded sequences defined as reference species and sequences described in this study (labelled in red) are included. 0.7-0.85 and 0.85-1.0 bootstrap value ranges are indicated with blue and red circles, respectively. Scale bar indicates the evolutionary distance in nucleotide substitutions per site.

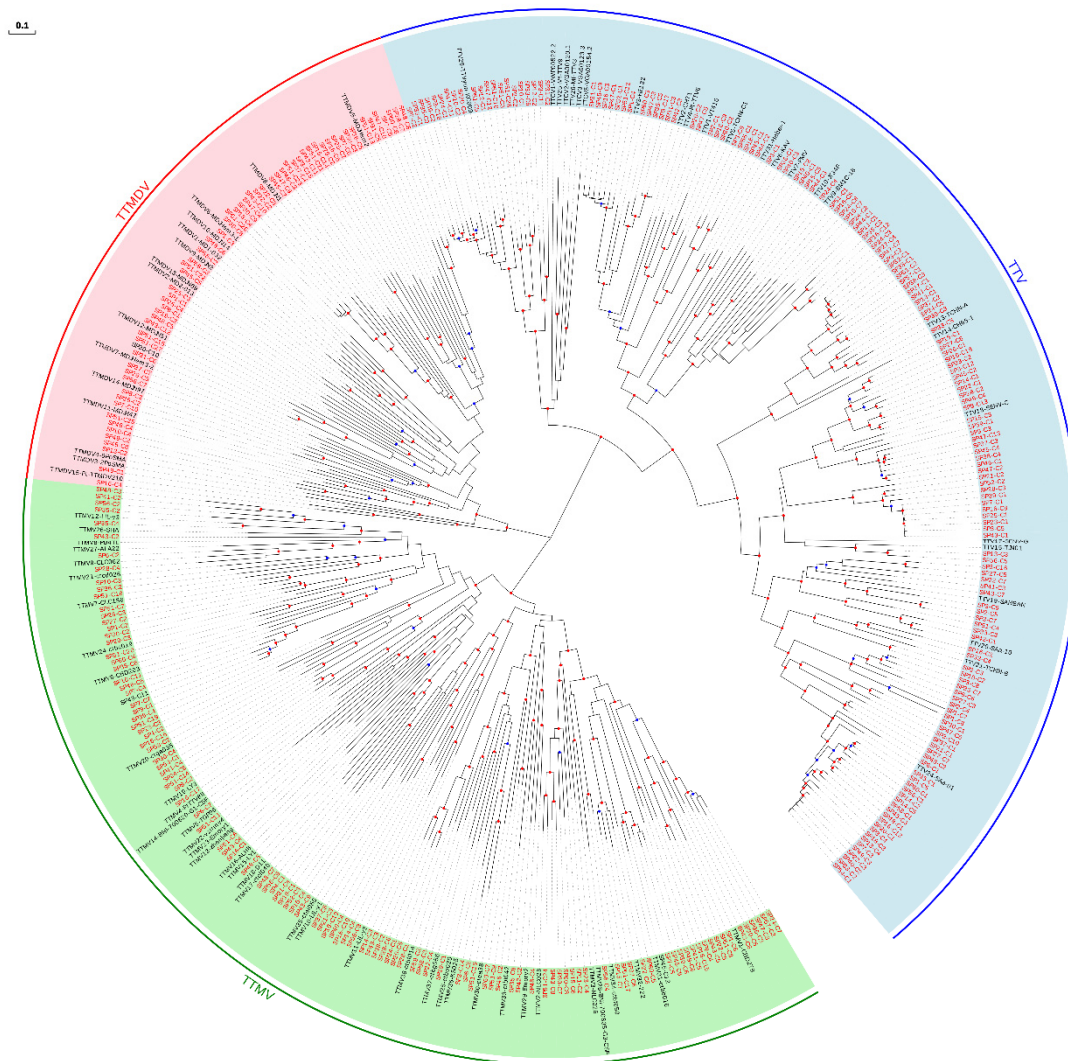

Supplement: s1 [file s1]
