# Supplementary material for: Exploring the Diversity of the Human Blood Virome
Source: Viruses. 2021 Nov 21;13(11):2322. doi: 10.3390/v13112322 (PMC8621239; doi:10.3390/v13112322)
Supplement: Supplementary file 1 [file viruses-13-02322-s001.zip]

Archive with 16 entries (16 files):
- Supplementary Figure S1.pdf
- Supplementary Figure S2.pdf
- Supplementary Figure S3.pptx
- Supplementary_Table_S1.xlsx
- Supplementary_Table_S10.xlsx
- Supplementary_Table_S11.xlsx
- Supplementary_Table_S12.xlsx
- Supplementary_Table_S13.xlsx
- Supplementary_Table_S2.xlsx
- Supplementary_Table_S3.xlsx
- Supplementary_Table_S4.xlsx
- Supplementary_Table_S5.xlsx
- Supplementary_Table_S6.xlsx
- Supplementary_Table_S7.xlsx
- Supplementary_Table_S8.xlsx
- Supplementary_Table_S9.xlsx
