# Supplementary material for: Exploring the Diversity of the Human Blood Virome
Source: Viruses. 2021 Nov 21;13(11):2322. doi: 10.3390/v13112322 (PMC8621239; doi:10.3390/v13112322)
Supplement: Supplementary file 1 [file viruses-13-02322-s001.zip › Supplementary_Table_S1.xlsx]

## Sheet: Hoja1
Supplementary Table S13. Demographic information of plasma donors included in each pool.
Pool	Sex	Age
SP1	F	27
	M	33
	F	25
	F	41
	F	23
	F	55
	M	57
	M	28
	F	48
	F	32
	F	23
SP2	F	18
	F	22
	F	22
	F	25
	F	24
	F	21
	M	57
	F	25
	M	18
	F	18
	F	22
SP3	F	35
	M	53
	M	59
	F	40
	M	42
	F	24
	M	34
	M	52
	F	52
	M	53
	M	52
	F	52
	M	53
SP4	F	23
	M	21
	F	20
	M	29
	F	19
	F	19
	F	18
	F	21
	M	24
	M	20
	F	18
SP5	M	21
	F	20
	F	24
	F	19
	F	21
	M	21
	F	18
	F	24
	F	31
	F	18
	F	20
SP6	F	47
	M	18
	F	21
	M	18
	M	21
	F	18
	M	21
	F	19
	M	21
	M	21
SP7	M	54
	F	48
	M	33
	M	40
	F	27
	M	52
	M	32
	M	45
	M	32
SP8	M	31
	M	40
	M	51
	F	48
	M	54
	M	20
	M	53
	M	57
	M	41
SP9	M	43
	M	61
	M	52
	M	46
	M	50
	M	50
	M	42
	M	23
SP10	M	46
	F	29
	F	48
	M	47
	F	49
	M	46
	F	47
	M	33
	F	23
	M	21
SP11	F	40
	M	27
	M	37
	F	41
	F	21
	F	22
	F	20
	F	22
SP12	F	28
	F	18
	F	30
	F	18
	F	18
	M	35
	F	22
	F	19
	F	18
	F	18
SP13	M	20
	F	18
	F	23
	M	22
	F	41
	F	21
	F	20
	F	18
	M	22
	F	48
SP14	F	18
	F	20
	F	24
	M	36
	F	18
	M	26
	M	18
	F	32
	M	20
	M	19
SP15	M	19
	F	26
	F	20
	F	19
	F	19
	M	18
	F	18
	M	26
	F	22
SP16	M	37
	F	53
	M	34
	M	42
	M	38
	F	50
	M	47
	M	22
	M	26
	F	27
SP17	F	19
	M	22
	F	18
	M	18
	M	18
	M	20
	F	23
	F	24
	F	23
	F	49
SP18	F	19
	M	26
	F	21
	M	33
	F	52
	M	30
	M	18
	M	19
	M	19
	F	19
SP19	M	20
	F	20
	M	19
	M	19
	F	19
	F	28
	F	44
	M	19
	F	20
	F	20
SP20	M	18
	F	28
	F	31
	F	23
	F	27
	F	18
	F	21
	F	19
	F	18
	M	18
SP21	M	44
	F	18
	F	21
	M	32
	M	19
	M	20
	M	49
	M	59
	F	58
	M	40
SP22	F	21
	F	21
	F	24
	F	19
	M	18
	F	19
	F	19
	F	18
	M	18
	F	20
SP23	F	57
	M	18
	F	20
	M	20
	M	18
	M	18
	M	20
	M	18
	F	18
	F	18
SP24	F	21
	F	35
	M	19
	F	18
	F	19
	M	22
	M	19
	M	18
	F	20
	F	22
SP25	M	20
	M	21
	M	22
	F	18
	F	18
	F	18
	F	35
	F	22
SP26	M	42
	F	61
	M	55
	F	50
	M	47
	M	59
	F	20
	F	24
	F	20
	F	20
SP27	F	23
	F	27
	M	19
	F	18
	M	18
	M	18
	M	18
	M	21
SP28	M	40
	M	37
	M	43
	F	58
	F	56
	M	33
	M	49
	F	22
	F	19
	M	50
SP29	F	18
	M	26
	M	31
	F	44
	M	20
	F	21
	M	54
	M	23
	F	38
	M	20
SP30	M	19
	M	18
	M	58
	F	26
	F	66
	M	58
	M	45
	M	36
	M	48
SP31	F	18
	F	19
	F	18
	F	18
	F	23
	F	23
	F	20
	M	24
	M	26
	F	19
SP32	F	23
	F	25
	F	23
	F	18
	F	49
	F	22
	F	35
	F	21
	F	18
	F	20
SP33	F	23
	F	22
	F	19
	M	31
	M	66
	F	43
	M	53
	F	46
	M	45
	M	29
SP34	M	22
	M	41
	F	19
	M	18
	M	52
	M	23
	F	23
	M	23
	F	18
	F	21
SP35	F	19
	M	21
	M	21
	M	60
	F	19
	F	19
	M	46
	F	18
	F	23
	F	19
SP36	F	19
	F	18
	F	18
	F	19
	F	NA
	F	19
	F	20
	F	19
	M	24
	M	47
SP37	F	48
	M	32
	F	19
	M	21
	F	46
	M	45
	M	39
	F	38
	F	20
	M	56
SP38	M	19
	M	20
	F	21
	M	19
	M	22
	F	18
	M	21
	M	18
	M	19
	M	39
SP39	F	18
	F	18
	M	21
	M	19
	F	18
	M	18
	M	18
	F	18
SP40	F	18
	F	19
	F	19
	F	18
	F	18
	F	18
	F	18
	F	41
	F	20
	F	22
SP41	M	26
	F	20
	F	21
	M	22
	F	22
	F	19
	F	19
	F	21
	F	53
	F	20
SP42	M	18
	M	18
	M	21
	M	21
	F	22
	F	19
	F	20
	F	20
	F	19
	M	19
SP43	M	54
	F	41
	F	57
	M	22
	F	47
	F	43
	M	60
	F	46
	M	55
SP44	F	19
	M	44
	M	39
	M	40
	M	37
	M	32
	F	41
	F	33
	M	35
	F	48
SP45	M	37
	F	19
	F	57
	F	28
	M	58
	M	53
	F	61
	F	38
	F	22
	M	40
SP46	M	36
	M	51
	F	53
	M	27
	M	43
	M	50
	F	43
	F	39
	M	53
	M	43
SP47	M	41
	M	44
	M	43
	F	56
	M	42
	M	34
	F	43
	F	37
	M	62
	M	40
SP48	M	20
	F	18
	M	20
	M	19
	M	20
	M	18
	F	18
	M	18
	M	18
	M	18
SP49	M	18
	M	21
	M	19
	M	19
	M	19
	M	18
	M	19
	M	44
	F	18
	F	18
SP50	M	54
	M	21
	F	18
	M	18
	M	18
	F	20
	M	19
	M	18
	M	21
SP51	M	53
	M	60
	M	39
	M	55
	M	49
	M	51
	M	57
	F	19
SP52	F	47
	M	51
	M	47
	M	39
	M	42
	M	37
	M	27
	F	46
SP53	M	25
	F	20
	F	21
	F	26
	M	33
	F	24
	F	23
	F	22
	M	19
	F	23
SP54	F	20
	F	26
	F	28
	F	23
	F	18
	F	18
	F	19
	F	21
	F	19
	F	22
SP55	M	46
	F	46
	F	40
	M	51
	M	42
	M	51
	M	43
	F	54
	F	52
	F	55
SP56	F	27
	F	37
	F	41
	F	56
	F	24
	M	60
	F	43
	F	38
	F	39
	M	39
SP57	F	21
	M	18
	F	21
	M	24
	F	22
	M	21
	M	23
	M	22
	M	23
	M	22
SP58	M	23
	M	19
	F	19
	M	18
	F	18
	M	20
	M	18
	M	24
	F	31
	M	18
SP59	F	21
	F	46
	F	22
	F	22
	F	20
	F	55
	M	23
	F	18
	F	42
	M	20
SP60	F	54
	M	48
	F	18
	F	18
	M	30
	F	24
	M	21
	M	18
	M	18
	F	50
