# Supplementary material for: Exploring the Diversity of the Human Blood Virome
Source: Viruses. 2021 Nov 21;13(11):2322. doi: 10.3390/v13112322 (PMC8621239; doi:10.3390/v13112322)
Supplement: Supplementary file 1 [file viruses-13-02322-s001.zip › Supplementary_Table_S2.xlsx]

## Sheet: Hoja1
Supplementary Table S4. List of anellovirus sequences/contigs detected in our study with the metaSPAdes analysis. For each sequence, names in the first and second column refer to the pool (SP) and contig name (C), respectively. Contig length (in nucleotides), average coverage depth, deduced size of the putative ORF1 (in amino acids), and accession number are given. The last column indicates genus…
Pool	sequence/contig name	Contig length (nt)	Average coverage depth	ORF1 size (aa)	Accession number	Genus
SP1	SP1_C1	3223	1404.01	659	MZ285962	TTMDV
	SP1_C2*	2988	57636.3	668	MZ286226	TTMV
	SP1_C3	2961	326.793	666	MZ285963	TTMDV
	SP1_C4	2930	461.203	739	MZ285964	TTV
	SP1_C5	2922	10.2355	765	MZ285965	TTV
	SP1_C6*	2837	4666.41	423	MZ286227	TTMV
	SP1_C7**	2424	497.783	514	MZ285966	TTV
	SP1_C8**	1768	28.3009	513	MZ285967	TTV
SP2	SP2_C1	3809	111787	761	MZ285968	TTV
	SP2_C2	3668	5032.8	641	MZ285969	TTV
	SP2_C3	3408	577.904	749	MZ285970	TTV
	SP2_C4	2988	25.6473	768	MZ285971	TTV
	SP2_C5	2971	14.8607	745	MZ285972	TTV
SP3	SP3_C1	3195	882.856	719	MZ285973	TTV
	SP3_C2	3087	557.2	780	MZ285974	TTV
	SP3_C3	3070	2507.19	756	MZ285975	TTV
	SP3_C4	3012	415.67	766	MZ285976	TTV
	SP3_C5	3004	129.713	773	MZ285977	TTV
	SP3_C6	2976	35.5655	750	MZ285978	TTV
	SP3_C7	2972	394.642	745	MZ285979	TTV
	SP3_C8	2968	288.149	767	MZ285980	TTV
	SP3_C9	2961	188.655	769	MZ285981	TTV
	SP3_C10	2943	237.139	771	MZ285982	TTV
	SP3_C11	2904	122.48	642	MZ285983	TTV
	SP3_C12	2872	1366.74	762	MZ285984	TTV
	SP3_C13	2867	3571.83	760	MZ285985	TTV
	SP3_C14*	2808	845.042	664	MZ286228	TTMV
	SP3_C15	2842	169.797	663	MZ285986	TTMDV
	SP3_C16	2759	6.3483	759	MZ285987	TTV
	SP3_C17	2542	14.9296	732	MZ285988	TTV
	SP3_C18	3033	1302.16	645	MZ285989	TTV
SP4	SP4_C1*	2879	3249.84	659	MZ286229	TTMV
	SP4_C2*	2848	1723.93	661	MZ286230	TTMV
SP6	SP6_C1**	3607	12.4641	508	MZ285990	TTV
	SP6_C2*	2925	4300.08	678	MZ286231	TTMV
	SP6_C4*	2810	66200.7	653	MZ286232	TTMV
	SP6_C5	2817	99.2336	669	MZ285991	TTMV
	SP6_C6	3585	17.2499	767	MZ285992	TTV
	SP6_C7*	2937	13199.2	668	MZ286233	TTMV
SP7	SP7_C1	3603	105.347	773	MZ285993	TTV
	SP7_C2	3167	93.6088	644	MZ285994	TTV
	SP7_C3	3006	31.8184	767	MZ285995	TTV
	SP7_C4*	2876	2468.99	655	MZ286234	TTMV
	SP7_C5*	2810	4733.4	642	MZ286235	TTMV
	SP7_C6	2751	103.526	507	MZ285996	TTMDV
	SP7_C7**	1849	12.609	549	MZ285997	TTMV
	SP7_C8**	1760	26.2153	520	MZ285998	TTMDV
	SP7_C10	2475	39.7931	662	MZ285999	TTMDV
SP8	SP8_C1	3185	10486.7	660	MZ286000	TTMDV
	SP8_C2*	2839	3603.48	653	MZ286236	TTMV
	SP8_C3	2779	72.4634	667	MZ286001	TTMDV
SP9	SP9_C1*	2876	20188	655	MZ286237	TTMV
SP10	SP10_C1	3643	308.14	641	MZ286002	TTV
	SP10_C2	3175	150.216	644	MZ286003	TTV
	SP10_C3	2971	14257.1	661	MZ286004	TTMV
	SP10_C4	2786	441.496	661	MZ286005	TTMDV
SP11	SP11_C1	3649	73.4346	735	MZ286006	TTV
	SP11_C2	2817	1571.38	643	MZ286007	TTMV
SP12	SP12_C1	3566	848.339	648	MZ286008	TTV
	SP12_C2	3515	5664.27	698	MZ286009	TTV
SP13	SP13_C1	3229	576.796	781	MZ286010	TTV
	SP13_C2*	3268	24083.3	662	MZ286238	TTMDV
	SP13_C3	3165	6448.77	758	MZ286011	TTV
	SP13_C4	3006	17.9042	766	MZ286012	TTV
SP14	SP14_C1	3288	2181.54	765	MZ286013	TTV
	SP14_C2	3029	19130.4	765	MZ286014	TTV
	SP14_C3*	2906	9893.72	667	MZ286239	TTMV
	SP14_C4*	2862	4351.38	652	MZ286240	TTMV
	SP14_C5**	1531	50.4161	509	MZ286015	TTV
SP15	SP15_C1	3811	4852.22	766	MZ286016	TTV
	SP15_C2	3806	4958.55	749	MZ286017	TTV
	SP15_C3	3145	395.66	759	MZ286018	TTV
	SP15_C4*	2948	17764.2	668	MZ286241	TTMV
	SP15_C5	2947	72.3441	743	MZ286019	TTV
	SP15_C6	2776	788.885	639	MZ286020	TTMV
	SP15_C7	2514	1483.92	643	MZ286021	TTMV
SP16	SP16_C1*	2859	4200.25	671	MZ286242	TTMV
	SP16_C2	3918	6798.99	741	MZ286022	TTV
	SP16_C3	3443	35.1046	738	MZ286023	TTV
	SP16_C4	3230	201.25	658	MZ286024	TTMDV
	SP16_C5	3174	747.083	743	MZ286025	TTV
	SP16_C6	3157	3879.41	661	MZ286026	TTMDV
	SP16_C7	3134	1446.57	745	MZ286027	TTV
	SP16_C8	3026	237.919	773	MZ286028	TTV
	SP16_C9	3007	133.29	769	MZ286029	TTV
	SP16_C10*	2890	14019.4	653	MZ286243	TTMV
	SP16_C11*	2879	608.655	656	MZ286244	TTMV
	SP16_C12	2928	206.855	735	MZ286030	TTV
	SP16_C13	2917	14.7285	767	MZ286031	TTV
	SP16_C14	2871	313.034	668	MZ286032	TTMDV
	SP16_C15*	2871	2750.23	647	MZ286245	TTMV
	SP16_C16	2830	382.001	664	MZ286033	TTMV
	SP16_C17	2623	206.414	655	MZ286034	TTMV
	SP16_C18	2351	13.8154	670	MZ286035	TTV
	SP16_C19	2127	5.3065	647	MZ286036	TTMV
SP18	SP18_C1	3816	167.447	771	MZ286037	TTV
	SP18_C2	3732	1107.9	749	MZ286038	TTV
	SP18_C3**	2155	5.3434	578	MZ286039	TTV
	SP18_C4**	2072	3405.47	613	MZ286040	TTMDV
SP19	SP19_C1*	2961	124699	681	MZ286246	TTMV
	SP19_C2	2837	1067.6	658	MZ286041	TTMDV
SP20	SP20_C1	3370	231.25	767	MZ286042	TTV
	SP20_C2	3184	460.634	764	MZ286043	TTV
	SP20_C3	2893	2226.38	664	MZ286044	TTMV
	SP20_C4	2889	26.9148	645	MZ286045	TTV
	SP20_C5*	2713	273.977	658	MZ286247	TTMV
SP21	SP21_C1	3507	123.015	742	MZ286046	TTV
	SP21_C2	2988	320.021	759	MZ286047	TTV
	SP21_C3	2890	109216	648	MZ286048	TTMV
SP22	SP22_C1	3501	22.2922	765	MZ286049	TTV
	SP22_C2	3241	6933.94	667	MZ286050	TTMDV
	SP22_C3	3015	16.4499	767	MZ286051	TTV
	SP22_C4*	2825	2145.83	688	MZ286248	TTMV
	SP22_C5	2858	1080.1	658	MZ286052	TTMV
	SP22_C6	2818	4027.17	643	MZ286053	TTMV
	SP22_C7**	2673	8.8987	759	MZ286054	TTV
	SP22_C8	2471	73.4966	667	MZ286055	TTMDV
SP23	SP23_C1	3866	2197.07	773	MZ286056	TTV
	SP23_C2	3515	60.9183	762	MZ286057	TTV
	SP23_C3*	2860	5323.36	664	MZ286249	TTMV
	SP23_C4	2879	5605.43	636	MZ286058	TTMV
SP24	SP24_C1	3766	266.181	644	MZ286059	TTV
	SP24_C2	3537	1461.93	756	MZ286060	TTV
	SP24_C3	3445	655.247	735	MZ286061	TTV
	SP24_C4	3034	88.2759	726	MZ286062	TTV
	SP24_C5	3006	229.975	782	MZ286063	TTV
	SP24_C6	2954	7.3615	748	MZ286064	TTV
	SP24_C7*	2852	6386.53	663	MZ286250	TTMV
	SP24_C8	2680	12.3675	653	MZ286065	TTMV
SP25	SP25_C1	3750	114.532	773	MZ286066	TTV
	SP25_C2	2644	1353.52	670	MZ286067	TTMDV
	SP25_C3	2640	333.583	664	MZ286068	TTMDV
	SP25_C4	2501	158.866	658	MZ286069	TTMDV
SP26	SP26_C1	3872	2176.36	766	MZ286070	TTV
	SP26_C2	2796	1289.66	647	MZ286071	TTMDV
	SP26_C3	2634	22.1739	668	MZ286072	TTMV
SP27	SP27_C1	3400	185.02	786	MZ286073	TTV
	SP27_C2*	2988	438.453	668	MZ286251	TTMV
	SP27_C3	3026	145.827	768	MZ286074	TTV
	SP27_C4	3015	193.071	780	MZ286075	TTV
	SP27_C5	2957	37.2434	759	MZ286076	TTV
	SP27_C6	2936	10.6178	766	MZ286077	TTV
	SP27_C7	2878	106.603	742	MZ286078	TTV
SP28	SP28_C1*	2832	8111.81	662	MZ286252	TTMV
	SP28_C2	3550	27.4223	556	MZ286079	TTV
	SP28_C3	3483	27.9546	765	MZ286080	TTV
	SP28_C4*	2920	1365.27	680	MZ286253	TTMV
	SP28_C5	2544	108.266	671	MZ286081	TTMDV
	SP28_C6	2543	8352.31	659	MZ286082	TTMV
	SP28_C7	2534	281.981	670	MZ286083	TTMDV
SP29	SP29_C1	2803	144.611	668	MZ286084	TTMV
	SP29_C2	1802	53.576	540	MZ286085	TTMDV
SP30	SP30_C1	3770	1042.27	772	MZ286086	TTV
	SP30_C2*	2978	48406.2	673	MZ286254	TTMV
	SP30_C3	2953	1042.45	660	MZ286087	TTMDV
	SP30_C4*	2832	433.064	657	MZ286255	TTMV
	SP30_C5	2871	286.661	659	MZ286088	TTMV
	SP30_C6*	2811	484.986	642	MZ286256	TTMV
	SP30_C7*	2762	565.136	628	MZ286257	TTMV
	SP30_C8	2582	68.0147	670	MZ286089	TTMDV
	SP30_C9	2550	259.842	666	MZ286090	TTMDV
	SP30_C10	2460	49.965	662	MZ286091	TTMDV
SP31	SP31_C1	3733	577.258	621	MZ286092	TTV
	SP31_C2	3690	4647.8	660	MZ286093	TTV
	SP31_C3	3122	694.208	732	MZ286094	TTV
	SP31_C4*	2952	25284.5	675	MZ286258	TTMV
	SP31_C5	2842	18027.7	663	MZ286095	TTMDV
	SP31_C6	2818	181.432	661	MZ286096	TTMDV
SP32	SP32_C1	3823	79.1483	780	MZ286097	TTV
SP33	SP33_C1	3686	2830.19	644	MZ286098	TTV
	SP33_C2	3574	2390.81	767	MZ286099	TTV
	SP33_C3	3546	219.238	753	MZ286100	TTV
	SP33_C4	3172	214.992	744	MZ286101	TTV
	SP33_C5	3136	625.141	789	MZ286102	TTV
	SP33_C6	2157	44.1808	511	MZ286103	TTV
	SP33_C7	2688	4.5521	763	MZ286104	TTV
SP34	SP34_C1*	2821	46784.3	658	MZ286259	TTMV
SP35	SP35_C1	2983	13.8471	768	MZ286105	TTV
	SP35_C2*	2928	17165.6	677	MZ286260	TTMV
	SP35_C3	2976	1081.14	735	MZ286106	TTV
	SP35_C4*	2912	16452.1	660	MZ286261	TTMV
	SP35_C5	2933	9724.29	731	MZ286107	TTV
	SP35_C6*	2849	43126	652	MZ286262	TTMV
	SP35_C8**	2058	1245.28	568	MZ286108	TTMV
	SP35_C9*	3667	2931.01	644	MZ286109	TTV
SP36	SP36_C1	3716	118.15	720	MZ286110	TTV
	SP36_C2*	2878	14977.4	657	MZ286263	TTMV
	SP36_C3*	2851	6745.5	663	MZ286264	TTMV
	SP36_C4	2889	31.6203	667	MZ286111	TTMV
	SP36_C5	2860	39799.4	665	MZ286112	TTMDV
SP37	SP37_C1	3818	3813.24	747	MZ286113	TTV
	SP37_C2	3187	1892.73	782	MZ286114	TTV
	SP37_C3	3113	685.704	756	MZ286115	TTV
	SP37_C4	2961	25799.6	654	MZ286116	TTMDV
	SP37_C5*	2848	17031.4	656	MZ286265	TTMV
	SP37_C6*	2802	45042.5	645	MZ286266	TTMV
	SP37_C7	2592	1232.15	667	MZ286117	TTMDV
SP38	SP38_C1	3237	421.454	780	MZ286118	TTV
	SP38_C2*	2823	35769	659	MZ286267	TTMV
	SP38_C3	2617	19.9985	693	MZ286119	TTV
	SP38_C4**	1778	33.784	533	MZ286120	TTV
SP39	SP39_C1	3630	1268.27	773	MZ286121	TTV
	SP39_C2	3503	20.1222	644	MZ286122	TTV
	SP39_C3	3103	274.989	782	MZ286123	TTV
SP40	SP40_C1	3513	16645.5	751	MZ286124	TTV
	SP40_C2	3171	335.365	767	MZ286125	TTV
	SP40_C3	3169	1684.56	734	MZ286126	TTV
	SP40_C4	2993	103704	655	MZ286127	TTMV
SP41	SP41_C1	3623	1409.47	786	MZ286128	TTV
	SP41_C2*	2965	10182.3	665	MZ286268	TTMV
	SP41_C3	3013	118.266	739	MZ286129	TTV
	SP41_C4*	2888	27901.2	653	MZ286269	TTMV
	SP41_C5*	2781	24788.8	647	MZ286270	TTMV
SP42	SP42_C1	3193	26.9646	750	MZ286130	TTV
	SP42_C2*	2855	4401.99	675	MZ286271	TTMV
	SP42_C3	2545	8.8994	732	MZ286131	TTV
SP43	SP43_C1	3719	122.661	773	MZ286132	TTV
	SP43_C2	2969	569.141	679	MZ286133	TTMV
	SP43_C3	2923	1109.29	672	MZ286134	TTMV
	SP43_C4*	2849	37268.9	664	MZ286272	TTMV
	SP43_C5*	2834	7485.03	658	MZ286273	TTMV
	SP43_C6*	2840	2375.47	662	MZ286274	TTMV
	SP43_C7	2854	21.3497	755	MZ286135	TTV
	SP43_C8*	2762	2638.79	628	MZ286275	TTMV
	SP43_C9	2652	991.04	671	MZ286136	TTMV
	SP43_C10	2575	2197.62	667	MZ286137	TTMDV
	SP43_C11	2557	723.037	664	MZ286138	TTMDV
	SP43_C12	2538	483.317	666	MZ286139	TTMDV
SP44	SP44_C1	3787	283.014	739	MZ286140	TTV
	SP44_C2	3479	1199.62	733	MZ286141	TTV
	SP44_C3	2936	55.5869	744	MZ286142	TTV
SP45	SP45_C1	3605	2865.62	702	MZ286143	TTV
	SP45_C2	3146	906.518	762	MZ286144	TTV
	SP45_C3	2978	20.4933	765	MZ286145	TTV
	SP45_C4	2873	432.813	756	MZ286146	TTV
	SP45_C5	2822	29153.2	662	MZ286147	TTMDV
	SP45_C6	2816	695.101	642	MZ286148	TTMV
	SP45_C7	2645	5136.11	659	MZ286149	TTMDV
	SP45_C8	2517	3213.26	661	MZ286150	TTMDV
	SP45_C9	2895	5.0083	739	MZ286151	TTV
	SP45_C11*	2876	4731.9	655	MZ286276	TTMV
	SP45_C12*	2818	712.158	642	MZ286277	TTMV
SP46	SP46_C1	3705	843.235	756	MZ286152	TTV
	SP46_C2*	2908	17198.9	675	MZ286278	TTMV
	SP46_C3	2963	2622.96	658	MZ286153	TTMDV
	SP46_C4	2600	925.575	662	MZ286154	TTMDV
	SP46_C5**	1866	9.5938	508	MZ286155	TTMV
SP47	SP47_C1	3996	1980	739	MZ286156	TTV
	SP47_C2	3428	2658.26	760	MZ286157	TTV
	SP47_C3	3353	964.859	733	MZ286158	TTV
	SP47_C4	3226	7582.78	667	MZ286159	TTMDV
	SP47_C5	3076	399.693	767	MZ286160	TTV
	SP47_C6	3072	119.609	773	MZ286161	TTV
	SP47_C7	3013	64.4033	780	MZ286162	TTV
	SP47_C8	2906	4461.35	663	MZ286163	TTMV
	SP47_C9	2517	107.422	663	MZ286164	TTMDV
	SP47_C10	2510	56.5685	672	MZ286165	TTMDV
	SP47_C11**	2462	94.5459	539	MZ286166	TTV
	SP47_C12**	2461	579.453	542	MZ286167	TTV
	SP47_C13	2923	6.9436	756	MZ286168	TTV
SP48	SP48_C1	3545	256.117	765	MZ286169	TTV
	SP48_C2	3367	12.2219	742	MZ286170	TTV
	SP48_C3*	2962	246.472	663	MZ286279	TTMV
	SP48_C4	2938	347.714	678	MZ286171	TTMV
	SP48_C5	2921	4484.32	662	MZ286172	TTMDV
	SP48_C6	2783	192.095	671	MZ286173	TTMDV
	SP48_C7**	2755	32708.8	618	MZ286174	TTMV
	SP48_C8	2539	423.298	670	MZ286175	TTMDV
SP49	SP49_C1	3275	14389.2	655	MZ286176	TTMDV
	SP49_C2	3181	35126.9	661	MZ286177	TTMDV
	SP49_C3	3034	723.277	767	MZ286178	TTV
	SP49_C4	3034	164.797	765	MZ286179	TTV
	SP49_C5*	2859	15617.9	652	MZ286280	TTMV
	SP49_C6	2829	24.1216	639	MZ286180	TTMV
SP51	SP51_C1	3738	209.995	741	MZ286181	TTV
	SP51_C2	3651	448.243	780	MZ286182	TTV
	SP51_C3	3621	1705.61	661	MZ286183	TTV
	SP51_C4	3537	99.4083	752	MZ286184	TTV
	SP51_C5	3113	26.0646	648	MZ286185	TTV
	SP51_C6*	2963	11701.4	674	MZ286281	TTMV
	SP51_C7*	2958	5539.36	667	MZ286282	TTMV
	SP51_C8*	2837	44151.2	659	MZ286283	TTMV
	SP51_C9*	2907	2239.29	675	MZ286284	TTMV
	SP51_C10	2946	55.7329	645	MZ286186	TTV
	SP51_C11	2942	3452.89	680	MZ286187	TTMV
	SP51_C12	2932	23.1736	739	MZ286188	TTV
	SP51_C13	2905	11111	676	MZ286189	TTMDV
	SP51_C14	2880	6491.73	653	MZ286190	TTMV
	SP51_C15	2850	3852.73	666	MZ286191	TTMDV
	SP51_C16	2820	1654.5	663	MZ286192	TTMV
	SP51_C17	2775	960.807	645	MZ286193	TTMV
	SP51_C18	2675	596.385	671	MZ286194	TTMV
	SP51_C19	2596	357.82	670	MZ286195	TTMV
	SP51_C20	2581	522.326	663	MZ286196	TTMV
	SP51_C21	2554	251.827	664	MZ286197	TTMDV
	SP51_C22	2546	661.04	662	MZ286198	TTMDV
	SP51_C23	2506	2011.83	655	MZ286199	TTMDV
	SP51_C24	2492	29.6473	634	MZ286200	TTMV
	SP51_C25	2463	45.9724	660	MZ286201	TTMDV
	SP51_C26	2463	24.5404	670	MZ286202	TTMDV
	SP51_C27	2443	16.3246	662	MZ286203	TTMDV
	SP51_C28**	2367	1283.05	503	MZ286204	TTV
SP52	SP52_C1	3778	3782.62	739	MZ286205	TTV
	SP52_C2	3552	349.393	760	MZ286206	TTV
	SP52_C3*	2963	12308.9	681	MZ286285	TTMV
SP53	SP53_C1	3016	30801.4	660	MZ286207	TTMV
SP54	SP54_C1	3762	187.899	767	MZ286208	TTV
SP55	SP55_C1	3813	65.9714	769	MZ286209	TTV
	SP55_C2	2052	10.0653	601	MZ286210	TTMDV
SP56	SP56_C1	3109	13.0267	764	MZ286211	TTV
	SP56_C2	2900	184.663	667	MZ286212	TTMV
	SP56_C3*	2837	8941.9	663	MZ286286	TTMV
	SP56_C4*	2778	1558.48	644	MZ286287	TTMV
	SP56_C5**	1947	8.5537	598	MZ286213	TTV
	SP56_C6*	2898	1236.75	668	MZ286288	TTMV
	SP56_C7	2831	1798.55	661	MZ286214	TTMDV
SP57	SP57_C1	3809	95.6842	779	MZ286215	TTV
	SP57_C2*	2847	5216.81	662	MZ286289	TTMV
SP58	SP58_C1	3703	10.5793	765	MZ286216	TTV
	SP58_C2*	2834	591.285	658	MZ286290	TTMV
	SP58_C3	2818	2304.33	661	MZ286217	TTMDV
SP59	SP59_C1	3161	17.5444	756	MZ286218	TTV
	SP59_C2*	2824	339.397	665	MZ286291	TTMV
	SP59_C3	2861	154.591	653	MZ286219	TTMV
SP60	SP60_C1	3532	26.6996	765	MZ286220	TTV
	SP60_C2	3160	22.3339	763	MZ286221	TTV
	SP60_C3	2959	28.535	735	MZ286222	TTV
	SP60_C4*	2889	6310.69	662	MZ286292	TTMV
	SP60_C5*	2834	7103.48	649	MZ286293	TTMV
	SP60_C6	2861	2349.91	670	MZ286223	TTMDV
	SP60_C7	2849	158.193	657	MZ286224	TTMV
	SP60_C8	2772	73.6205	627	MZ286225	TTMV
