# Supplementary material for: Exploring the Diversity of the Human Blood Virome
Source: Viruses. 2021 Nov 21;13(11):2322. doi: 10.3390/v13112322 (PMC8621239; doi:10.3390/v13112322)
Supplement: Supplementary file 1 [file viruses-13-02322-s001.zip › Supplementary_Table_S3.xlsx]

## Sheet: Hoja1
Supplementary Table S12. List of HPgV isolates downloaded from Genbank and described in the present study. Accession number, isolate name, and origin are indicated. *Isolates described in the present study.
Accession	Isolate	Origin
D90600	T110	Japan
AF121950	Iowan	USA
U44402	PNF2161	USA
D87262	GSI85	Japan
D87709	K1737	Japan
D87710	K1741	Japan
D87711	K1789	Japan
D87712	K1916	Japan
D87714	K1668	Japan
D90601	T230	Japan
AB008342	HGV-IM71	Japan
LT009478	89859249	United Kingdom
LT009479	89859262	United Kingdom
LT009483	67845223	Democratic Republic of the Congo
U36380		West Africa
D87255	HGV-Iw	Japan
AF081782	pHGVqz	China
MK234885	EG	Egypt
JN127373	UU1	USA
U63715	GBV-C(EA)	East Africa
LT009485	56330265	United Kingdom
LT009487	89860237	United Kingdom
LT009481	56330227	South Africa
LT009484	56330260	United Kingdom
LT009480	56330218	United Kingdom
LT009482	56330281	Australia
LT009486	56330292	United Kingdom
LT009494	56330286	United Kingdom
KP259281	H40048	Denmark
AF031827	HGV-T55875	USA
LT009488	56330272	Democratic Republic of the Congo
LT009490	56330276	Democratic Republic of the Congo
AB008336	F1029	Japan
KM670110	EM110	Sierra Leone
KM670096	G3796	Sierra Leone
KM670097	G3795	Sierra Leone
KM670099	G3765.2	Sierra Leone
MN551062	MAL-13279	Mali
KM670109	G3808	Sierra Leone
MK291245	H.sapiens-wt/USA/GBVC-SM2	USA
MH053115	JD2B2C	France
MK291244	H.sapiens-wt/USA/GBVC-SM3	USA
LT009489	56330229	United Kingdom
AY196904	765	USA
AF309966	PEI	Germany
HQ331233	KY117	China
HQ331235	DH028	China
KM670098	G3821	Sierra Leone
KM670102	G3825	Sierra Leone
KM670106	G3819	Sierra Leone
KM670108	EM119	Sierra Leone
KM670100	G3845	Sierra Leone
KM670101	G3850	Sierra Leone
KM670107	G3826	Sierra Leone
KC618401	Hu_21	Uganda
KC618398	Hu_5	Uganda
KC618400	Hu_20	Uganda
KC618399	Hu_6	Uganda
KP710602	469-66	Cameroon
KP710605	CHU2727	Cameroon
D87708	K606	Japan
KP710598	263-26	Cameroon
KP710601	280-10	Cameroon
KP710603	920-49	Cameroon
KP710606	8013815	South Africa
KP710599	740-14	Cameroon
KP710604	833-62	Cameroon
KP710600	62-11	Cameroon
MN215902	P25	Brazil
AB013500	HGV-GA128	Ghana
AB021287	HGV-MY14	Myanmar
AB018667	HGV-VT48	Vietnam
AB013501	HGV-BL230	Bolivia
U94695	HGVCN	China
MH053119	JD2B1I	France
MN215911	P55	Brazil
MH053120	JD2B3C	France
MN551064	NIG-N3559	Niger
MN215903	P26	Brazil
MN215898	P21	Brazil
MH053121	JD2B8C	France
AY949771	D50	South Africa
MH746815	GBV-C-ZJ-180501	China
D87715	K1775	Japan
MN215910	P35	Brazil
U75356	HGVC964	China
MN215907	P32	Brazil
MN215900	P23	Brazil
MH053117	JD2B9I	France
U45966	R10291	USA
MN215897	P13	Brazil
MK684252	BRA-2015-17	Brazil
MH053118	JD2B15C	France
MN551063	MAU-23	Mauritania
MN551061	BUR-19955	Burundi
AF104403	European	France
MH179063	LE-1	Canada
AF006500	HGV-GD (Guangdong)	Hong Kong
AB003291	CG12LC	Japan
AB003289	CG01BD	Japan
AB003290	CG07BD	Japan
MH053116	JD2B7I	France
AB003288	BG1HC	Japan
AB003292	G05BD	Japan
AB003293	G13HC	Japan
MW467971	P9-c1	Spain
MZ420565	HPgV-SP1*	Spain
MZ420566	HPgV-SP3*	Spain
MZ420567	HPgV-SP4*	Spain
MZ420568	HPgV-SP11*	Spain
MZ420569	HPgV-SP13*	Spain
MZ420570	HPgV-SP19*	Spain
MZ420571	HPgV-SP20*	Spain
MZ420572	HPgV-SP29*	Spain
MZ420573	HPgV-SP30*	Spain
MZ420574	HPgV-SP33*	Spain
MZ420575	HPgV-SP38*	Spain
MZ420576	HPgV-SP44*	Spain
MZ420577	HPgV-SP49*	Spain
MZ420578	HPgV-SP53-C1*	Spain
MZ420579	HPgV-SP53-C2*	Spain
MZ420580	HPgV-SP56*	Spain
MZ420581	HPgV-SP58*	Spain
