# Supplementary material for: Exploring the Diversity of the Human Blood Virome
Source: Viruses. 2021 Nov 21;13(11):2322. doi: 10.3390/v13112322 (PMC8621239; doi:10.3390/v13112322)
Supplement: Supplementary file 1 [file viruses-13-02322-s001.zip › Supplementary_Table_S4.xlsx]

## Sheet: Hoja1
Supplementary Table S1. Results of viral taxonomic classification using Centrifuge for controls and samples. Recentrifuge values are also provided for samples. The number of total, eukaryotic, human, bacterial, and viral reads is shown. Subsequent rows show the distribution of reads in the viral fraction, including spiked viruses, viral families, and other taxonomic levels related with unclassifi…
				C01	C02	C03	C04	C05	C06	C07	C09	SP1		SP2		SP3		SP4		SP5		SP6		SP7		SP8		SP9		SP10		SP11		SP12		SP13		SP14		SP15		SP16		SP17		SP18		SP19
			TAXID	centrifuge	centrifuge	centrifuge	centrifuge	centrifuge	centrifuge	centrifuge	centrifuge	centrifuge	recentrifuge	centrifuge	recentrifuge	centrifuge	recentrifuge	centrifuge	recentrifuge	centrifuge	recentrifuge	centrifuge	recentrifuge	centrifuge	recentrifuge	centrifuge	recentrifuge	centrifuge	recentrifuge	centrifuge	recentrifuge	centrifuge	recentrifuge	centrifuge	recentrifuge	centrifuge	recentrifuge	centrifuge	recentrifuge	centrifuge	recentrifuge	centrifuge	recentrifuge	centrifuge	recentrifuge	centrifuge	recentrifuge	centrifuge	recentrifuge
		# Total reads	1	1512364	2934736	2404884	1763621	2638467	2765201	1596780	2102005	2289501	196338	3009998	1605959	3645321	664325	2174634	40895	1703586	73379	2352270	913488	1806835	106086	1625668	134916	3583020	589508	2537874	477639	3403188	336327	1256080	300009	2136784	482381	2904716	714052	2653163	309923	2090336	352193	2462645	303278	2164190	392693	1468005	184927
		# eukaryotic reads	2759	410415	2076213	1054679	925628	1506421	1614744	816573	1200014	1365440	40615	911571	17551	736745	12364	1365133	16428	928592	13928	698134	55111	1053711	19775	812285	30721	979713	11891	415399	35799	1311776	17360	724090	152866	504685	88592	389596	10878	1312859	22386	755959	17926	792252	16363	340349	13550	756341	73916
		# Human reads	9604	967	1631	1088	3655	2607	1263	1274	600	17129	34	9426	16	13568	11	6667	41	13314	24	17419	17	17631	28	14414	0	21177	10	9622	7	7578	7	14985	7	10137	9	11698	0	14249	41	9776	12	9475	11	4095	0	9813	22
		# Bacterial reads	2	978827	702282	1106184	712945	895613	944325	660043	785048	461016	5375	331115	3608	457875	3174	614722	3756	528593	4143	153950	4875	473501	6563	496181	5477	526312	7227	116044	4217	664206	5372	144153	37705	125933	31506	270188	1220	402521	3479	271640	3659	335172	1199	207699	4250	479440	23787
		# Viral reads	10239	593	8022	76410	3589	93531	4588	2964	6731	177442	150289	1610684	1584650	690731	648357	24702	20624	57132	55222	899739	852961	91792	79357	114235	98682	614570	570035	475432	437159	331591	313318	150467	109360	501117	361428	755739	701295	305216	283937	356374	330371	298993	285459	400838	374355	125355	87181
		PhiX174	1910954	0	0	0	0	0	0	0	0	15370	14900	587	570	522092	505441	0	0	0	0	134156	128460	15972	15450	10071	9774	423546	409326	415234	400117	302524	292475	31247	30330	264237	255588	441671	426484	133064	128729	181419	174944	289211	279307	354798	342491	0	0
		VSV	11270	0	0	0	0	0	0	0	0	8540	8291	546	533	7193	6857	6570	6321	7318	7070	5823	5538	723	674	7917	7615	7334	7166	5422	5218	5390	5207	6309	6074	4036	3901	1368	1323	13754	13275	2934	2832	6261	6068	577	562	3038	2945
		Anelloviridae	687329	0	0	0	0	0	0	0	0	116605	101069	1599561	1580534	146099	131969	11940	9992	48508	47927	756627	718633	68474	63139	86357	76204	174076	153491	34619	30175	10908	9787	66197	57559	119903	95922	288028	271731	154350	141896	166121	149985	15	10	29061	24134	109018	74391
		Environmental samples	186616	68	73	166	36	840	748	1017	160	944	0	93	0	71	0	307	0	282	0	47	0	1067	0	107	0	99	0	625	0	134	11	8723	0	6	0	714	0	53	0	1855	0	25	0	50	0	105	0
		CRESS viruses	2202562	400	6012	75998	2312	12260	3217	1729	624	1544	0	249	0	1651	0	381	0	85	0	363	0	5153	0	17	0	8886	0	10923	0	4960	0	18702	0	56199	0	583	0	3583	0	92	0	2756	0	130	125	11	0
		Others	12429	0	615	12	67	43641	10	86	389	9	0	2880	2449	58	55	38	21	135	35	0	0	31	21	594	143	94	22	7	0	267	0	503	486	11	0	1008	1007	0	0	2664	2523	39	0	46	6	46	42
		Baculoviridae	10442	0	0	0	0	0	0	0	0	0	0	0	0	0	0	0	0	16	16	0	0	0	0	0	0	0	0	0	0	0	0	253	252	0	0	0	0	0	0	0	0	0	0	0	0	0	0
		Bicaudaviridae	423358	0	0	0	0	0	0	0	0	0	0	0	0	0	0	0	0	0	0	0	0	0	0	0	0	0	0	0	0	0	0	0	0	0	0	0	0	0	0	0	0	0	0	0	0	0	0
		Lipothrixviridae	10477	0	0	0	0	0	0	0	0	0	0	0	0	0	0	0	0	0	0	0	0	0	0	0	0	0	0	0	0	0	0	0	0	0	0	0	0	0	0	0	0	0	0	0	0	9	9
		Polydnaviridae	10482	0	0	0	0	0	0	0	0	0	0	0	0	0	0	0	0	0	0	0	0	0	0	0	0	0	0	0	0	0	0	0	0	0	0	0	0	0	0	0	0	0	0	0	0	0	0
Duplodnaviria
	Caudovirales		28883	31	307	42	240	30	150	18	4785	154	27	563	540	135	97	44	20	248	11	113	44	173	31	118	65	50	30	52	15	26	0	206	73	1730	1705	33	8	59	0	23	9	82	64	9	0	83	57
		Ackermannviridae	2169529	0	0	0	0	0	0	0	0	0	0	0	0	0	0	0	0	0	0	0	0	0	0	0	0	0	0	0	0	0	0	0	0	0	0	0	0	0	0	0	0	0	0	0	0	0	0
		Autographiviridae	2731643	0	0	0	0	0	0	0	0	0	0	0	0	0	0	0	0	0	0	0	0	0	0	0	0	0	0	0	0	7	0	0	0	0	0	0	0	0	0	0	0	0	0	0	0	0	0
		Drexlerviridae	2731691	0	0	0	0	0	0	0	0	0	0	0	0	0	0	0	0	0	0	0	0	0	0	0	0	0	0	0	0	0	0	0	0	0	0	0	0	0	0	0	0	0	0	0	0	0	0
		Herelleviridae	2560065	0	0	0	0	0	0	0	0	0	0	0	0	18	0	0	0	0	0	0	0	0	0	0	0	0	0	0	0	0	0	0	0	0	0	0	0	0	0	0	0	0	0	0	0	0	0
		Myoviridae	10662	26	16	16	230	18	43	8	12	114	0	8	0	34	22	32	20	231	0	42	33	122	6	6	0	43	30	39	7	11	0	11	0	51	35	10	0	9	0	6	0	44	39	6	0	62	48
		Podoviridae	10744	0	0	0	0	0	0	0	3535	0	0	0	0	18	17	0	0	0	0	0	0	0	0	0	0	0	0	0	0	0	0	6	6	1636	1635	0	0	0	0	0	0	0	0	0	0	0	0
		Siphoviridae	10699	0	0	16	0	0	6	0	0	30	27	544	540	62	58	0	0	12	11	14	11	26	25	111	65	0	0	10	8	0	0	69	67	41	35	13	8	0	0	13	9	33	25	0	0	11	9
	Herpesvirales		548681	0	0	27	0	0	10	0	0	0	0	0	0	0	0	0	0	0	0	0	0	0	0	0	0	10	0	0	0	0	0	0	0	10	8	7	7	0	0	0	0	0	0	0	0	0	0
		Herpesviridae	10292	0	0	27	0	0	10	0	0	0	0	0	0	0	0	0	0	0	0	0	0	0	0	0	0	10	0	0	0	0	0	0	0	10	8	7	7	0	0	0	0	0	0	0	0	0	0
Riboviria
		Closteroviridae	69973	0	0	0	0	0	0	0	0	0	0	0	0	0	0	0	0	0	0	0	0	0	0	0	0	0	0	0	0	0	0	0	0	0	0	0	0	0	0	0	0	0	0	0	0	0	0
		Hepeviridae	291484	0	0	0	0	0	0	0	0	17	17	7	7	8	8	9	9	0	0	0	0	7	7	0	0	0	0	0	0	0	0	7	7	0	0	0	0	6	6	7	7	0	0	0	0	10	10
		Flaviviridae	11050	0	0	6	0	0	0	0	0	33898	25965	0	0	4370	3669	5220	4250	0	0	0	0	14	14	0	0	0	0	0	0	6846	5706	0	0	1392	1173	0	0	0	0	9	9	0	0	0	0	420	339
		Leviviridae	11989	0	0	6	0	0	0	0	0	0	0	0	0	0	0	0	0	0	0	0	0	0	0	0	0	0	0	0	0	0	0	0	0	0	0	9	9	0	0	0	0	0	0	0	0	0	0
		Luteoviridae	119163	25	41	116	34	9	0	0	0	45	0	329	0	0	0	0	0	0	0	0	0	0	0	82	0	0	0	0	0	0	0	0	0	0	0	0	0	0	0	23	0	0	0	18	0	12	0
		Mitoviridae	2732892	0	0	0	0	0	0	0	0	0	0	0	0	0	0	0	0	0	0	21	21	0	0	0	0	0	0	0	0	0	0	0	0	0	0	0	0	0	0	0	0	0	0	0	0	0	0
		Orthomyxoviridae	11308	0	0	0	0	0	0	0	0	0	0	0	0	0	0	0	0	0	0	0	0	0	0	0	0	0	0	0	0	0	0	0	0	0	0	0	0	0	0	0	0	0	0	0	0	0	0
		Picobirnaviridae	585893	0	0	0	0	0	0	0	0	0	0	0	0	0	0	0	0	0	0	0	0	0	0	0	0	0	0	0	0	0	0	0	0	0	0	0	0	0	0	0	0	0	0	0	0	0	0
		Potyviridae	39729	0	0	0	0	0	0	0	0	0	0	0	0	0	0	11	11	0	0	0	0	0	0	0	0	0	0	0	0	0	0	0	0	0	0	0	0	0	0	0	0	0	0	0	0	7	7
		Reoviridae	10880	0	0	0	0	8	0	0	0	7	0	0	0	0	0	0	0	0	0	15	14	0	0	0	0	0	0	31	31	0	0	21	18	19	19	0	0	0	0	0	0	0	0	0	0	0	0
		Solemoviridae	2169577	0	0	0	0	57	0	0	0	44	0	0	0	0	0	91	0	0	0	0	0	0	0	0	0	0	0	0	0	0	0	0	0	0	0	0	0	0	0	0	0	0	0	0	0	0	0
		Tombusviridae	39738	0	0	0	0	0	0	0	0	0	0	0	0	0	0	0	0	0	0	0	0	0	0	0	0	0	0	0	0	0	0	0	0	0	0	0	0	0	0	0	0	0	0	0	0	0	0
		Virgaviridae	675071	0	0	0	0	0	0	9	0	0	0	0	0	0	0	0	0	0	0	0	0	0	0	0	0	0	0	0	0	0	0	0	0	0	0	0	0	0	0	0	0	0	0	0	0	0	0
	Bunyavirales		1980410	0	0	0	0	0	0	16	0	11	7	10	0	132	124	8	0	13	9	17	10	9	0	11	0	7	0	10	6	0	0	11	0	12	10	0	0	16	8	14	9	18	10	0	0	9	0
		Nairoviridae	1980415	0	0	0	0	0	0	0	0	7	7	0	0	0	0	0	0	10	9	10	10	0	0	0	0	0	0	6	6	0	0	0	0	10	10	0	0	8	8	9	9	10	10	0	0	0	0
		Peribunyaviridae	1980416	0	0	0	0	0	0	0	0	0	0	0	0	125	124	0	0	0	0	0	0	0	0	0	0	0	0	0	0	0	0	0	0	0	0	0	0	0	0	0	0	6	0	0	0	0	0
		Phenuiviridae	1980418	0	0	0	0	0	0	14	0	0	0	0	0	0	0	0	0	0	0	0	0	0	0	0	0	0	0	0	0	0	0	0	0	0	0	0	0	0	0	0	0	0	0	0	0	0	0
	Ghabrivirales		2732540	0	0	0	0	0	0	0	0	0	0	0	0	0	0	0	0	0	0	0	0	0	0	0	0	0	0	0	0	0	0	0	0	0	0	100	100	0	0	0	0	0	0	0	0	0	0
		Totiviridae	11006	0	0	0	0	0	0	0	0	0	0	0	0	0	0	0	0	0	0	0	0	0	0	0	0	0	0	0	0	0	0	0	0	0	0	100	100	0	0	0	0	0	0	0	0	0	0
	Mononegavirales		11157	0	0	0	0	0	0	40	0	14	13	5	0	2	0	1	0	2	0	4	0	6	0	6	6	5	0	3	0	11	11	20	20	3	0	1	0	11	10	6	0	1	0	1	0	1	0
		Paramyxoviridae	11158	0	0	0	0	0	0	40	0	14	13	0	0	0	0	0	0	0	0	0	0	6	0	6	6	0	0	0	0	11	11	6	6	0	0	0	0	11	10	6	0	0	0	0	0	0	0
	Nidovirales		76804	0	0	0	0	0	19	8	0	0	0	0	0	0	0	0	0	0	0	0	0	0	0	0	0	0	0	0	0	0	0	0	0	0	0	0	0	0	0	0	0	0	0	0	0	0	0
		Coronaviridae	11118	0	0	0	0	0	19	8	0	0	0	0	0	0	0	0	0	0	0	0	0	0	0	0	0	0	0	0	0	0	0	0	0	0	0	0	0	0	0	0	0	0	0	0	0	0	0
	Picornavirales		464095	0	0	0	0	0	0	0	0	0	0	0	0	76	76	0	0	0	0	0	0	0	0	8	8	0	0	0	0	0	0	0	0	9	0	0	0	0	0	0	0	0	0	0	0	0	0
		Dicistroviridae	232795	0	0	0	0	0	0	0	0	0	0	0	0	0	0	0	0	0	0	0	0	0	0	0	0	0	0	0	0	0	0	0	0	0	0	0	0	0	0	0	0	0	0	0	0	0	0
		Marnaviridae	324901	0	0	0	0	0	0	0	0	0	0	0	0	66	66	0	0	0	0	0	0	0	0	8	8	0	0	0	0	0	0	0	0	0	0	0	0	0	0	0	0	0	0	0	0	0	0
		Picornaviridae	12058	0	0	0	0	0	0	0	0	0	0	0	0	10	10	0	0	0	0	0	0	0	0	0	0	0	0	0	0	0	0	0	0	0	0	0	0	0	0	0	0	0	0	0	0	0	0
		Secoviridae	675072	0	0	0	0	0	0	0	0	0	0	0	0	0	0	0	0	0	0	0	0	0	0	0	0	0	0	0	0	0	0	0	0	0	0	0	0	0	0	0	0	0	0	0	0	0	0
	Ortervirales		2169561	0	12	0	0	6	90	0	0	0	0	0	0	7	0	0	0	33	0	0	0	0	0	0	0	0	0	28	0	27	20	0	0	0	0	63	0	89	0	22	0	0	0	8	0	8	0
		Retroviridae	11632	0	12	0	0	6	90	0	0	0	0	0	0	7	0	0	0	33	0	0	0	0	0	0	0	0	0	28	0	27	20	0	0	0	0	63	0	89	0	22	0	0	0	8	0	7	0
Varidnaviria
		Adenoviridae	10508	0	0	0	0	0	0	0	0	0	0	0	0	0	0	0	0	0	0	0	0	0	0	0	0	0	0	0	0	0	0	0	0	0	0	0	0	0	0	0	0	0	0	0	0	0	0
		Asfarviridae	137992	0	0	0	0	0	0	0	0	0	0	0	0	0	0	0	0	0	0	0	0	0	0	0	0	0	0	0	0	0	0	0	0	0	0	0	0	0	0	0	0	0	0	0	0	0	0
		Iridoviridae	10486	0	0	0	8	0	0	0	0	0	0	28	0	0	0	0	0	0	0	0	0	0	0	0	0	0	0	0	0	0	0	0	0	0	0	15	0	0	0	0	0	0	0	0	0	0	0
		Marseilleviridae	944644	0	0	0	0	0	0	0	0	0	0	0	0	0	0	0	0	0	0	7	6	0	0	0	0	0	0	0	0	0	0	0	0	0	0	0	0	0	0	0	0	0	0	0	0	0	0
		Mimiviridae	549779	0	0	0	101	0	33	0	20	7	0	24	17	8464	14	0	0	163	124	0	0	26	21	55	46	11	0	0	0	0	0	10	0	0	0	32	21	0	0	20	17	11	0	0	0	48	46
		Phycodnaviridae	10501	0	0	0	0	0	0	0	0	0	0	0	0	0	0	0	0	0	0	32	32	0	0	2213	2213	0	0	0	0	0	0	0	0	0	0	0	0	0	0	0	0	0	0	0	0	0	0
		Poxviridae	10240	0	0	0	86	0	0	0	0	0	0	0	0	0	0	0	0	9	8	0	0	0	0	2487	2483	0	0	0	0	0	0	0	0	0	0	0	0	0	0	0	0	0	0	0	0	0	0
Monodnaviria
		Circoviridae	39724	0	0	14	0	5270	0	0	733	0	0	30	0	63	0	0	0	0	0	0	0	0	0	0	0	0	0	1607	1597	0	0	14541	14541	3997	3096	598	598	0	0	46	45	0	0	7037	7037	9303	9299
		Geminiviridae	10811	0	0	0	0	0	0	0	0	0	0	0	0	0	0	0	0	0	0	0	0	0	0	0	0	0	0	0	0	0	0	0	0	0	0	0	0	0	0	0	0	0	0	0	0	10	10
		Genomoviridae	1910928	0	0	0	44	0	0	0	0	0	0	0	0	0	0	0	0	0	0	0	0	0	0	86	86	0	0	0	0	0	0	0	0	0	0	7	7	0	0	0	0	0	0	0	0	0	0
		Inoviridae	10860	0	0	0	0	0	0	0	0	0	0	0	0	0	0	0	0	0	0	0	0	0	0	0	0	0	0	0	0	0	0	0	0	0	0	0	0	0	0	0	0	0	0	0	0	0	0
		Microviridae	10841	6	108	0	0	9	287	0	0	1	0	0	0	12	0	0	0	0	0	684	130	0	0	1	0	18	0	5425	0	287	0	5	0	24	0	26	0	45	13	7	0	5	0	10	0	949	0
		Nanoviridae	251095	0	0	0	0	0	0	0	0	0	0	0	0	47	47	0	0	0	0	0	0	0	0	0	0	0	0	0	0	62	62	0	0	0	0	0	0	0	0	0	0	0	0	0	0	0	0
		Papillomaviridae	151340	0	0	0	0	0	0	0	0	0	0	0	0	0	0	0	0	0	0	63	63	0	0	0	0	0	0	0	0	0	0	0	0	0	0	0	0	0	0	0	0	0	0	0	0	0	0
		Parvoviridae	10780	0	0	0	0	0	0	0	0	0	0	0	0	0	0	0	0	0	0	0	0	0	0	0	0	0	0	0	0	0	0	0	0	0	0	0	0	0	0	0	0	0	0	0	0	0	0
[truncated: 82 more columns]
