# Supplementary material for: Exploring the Diversity of the Human Blood Virome
Source: Viruses. 2021 Nov 21;13(11):2322. doi: 10.3390/v13112322 (PMC8621239; doi:10.3390/v13112322)
Supplement: Supplementary file 1 [file viruses-13-02322-s001.zip › Supplementary_Table_S5.xlsx]

## Sheet: Hoja1
Supplementary Table S2. Summary of taxonomic classification results for the 60 pools analyzed. For each pool, the total number of reads and those classified by Centrifuge/Recentrifuge is given. Bacterial reads and those classified as belonging to spiked viruses, anelloviruses, HPgV, and other viruses is also provided. The last column indicates the number of detected anellovirus contigs larger tha…
Pool	total reads	Centrifuge	Recentrifuge	Bacterial	PhiX174	Anelloviridae	VSV	Pegivirus (HPgV)	Other viruses	Anellovirus contigs
SP1	3796324	2289501	196338	5375	14900	101069	8291	25965	64	8
SP2	3951915	3009998	1605959	3608	570	1580534	533	0	3013	5
SP3	4215441	3645321	664325	3174	505441	131969	6857	3669	421	18
SP4	3180562	2174634	40895	3756	0	9992	6321	4250	61	2
SP5	2608994	1703586	73379	4143	0	47927	7070	0	225	0
SP6	3893547	2352270	913488	4875	128460	718633	5538	0	330	6
SP7	2528739	1806835	106086	6563	15450	63139	674	0	94	9
SP8	2350928	1625668	134916	5477	9774	76204	7615	0	5089	3
SP9	4387599	3583020	589508	7227	409326	153491	7166	0	52	1
SP10	3633923	2537874	477639	4217	400117	30175	5218	0	1649	4
SP11	4250621	3403188	336327	5372	292475	9787	5207	5706	143	2
SP12	3456585	1256080	300009	37705	30330	57559	6074	0	15397	2
SP13	3438397	2136784	482381	31506	255588	95922	3901	1173	4844	4
SP14	3769870	2904716	714052	1220	426484	271731	1323	0	1757	5
SP15	3993353	2653163	309923	3479	128729	141896	13275	0	37	7
SP16	2960429	2090336	352193	3659	174944	149985	2832	9	2610	19
SP17	3314601	2462645	303278	1199	279307	10	6068	0	74	0
SP18	3142482	2164190	392693	4250	342491	24134	562	0	7168	4
SP19	3346781	1468005	184927	23787	0	74391	2945	339	9506	2
SP20	4304944	2874315	204697	5419	116413	73067	2737	373	21	5
SP21	2848576	1620534	287086	2022	112415	124389	3476	0	4952	3
SP22	4513506	2837903	244255	8041	139621	51168	4494	0	3428	8
SP23	4191762	2616319	166220	8066	75990	51730	7835	0	557	4
SP24	4195034	2682450	181668	12326	50653	71389	13502	0	7583	8
SP25	4774020	3958641	552444	6461	518371	4269	6391	0	262	4
SP26	2961597	2153180	218589	2857	150641	27676	9324	0	84	3
SP27	4720294	3795709	537956	1406	492616	7659	17783	0	3030	7
SP28	4420638	2589902	132856	4860	4519	96187	7726	0	270	7
SP29	4468044	3009670	405675	10921	12780	334689	10732	6606	18366	2
SP30	2766617	1691202	220625	41791	84210	69110	5252	6924	156	10
SP31	4543572	2953662	375489	4564	12811	332437	11146	0	816	6
SP32	4662292	4100077	739216	3105	718107	1011	7691	0	223	1
SP33	4456048	3552422	518434	2888	424637	72784	7138	2033	68	7
SP34	4866588	3891973	919742	5095	621233	270083	12170	0	57	1
SP35	4647955	3844985	1007257	7813	559561	419986	1752	0	317	8
SP36	4401355	3457519	727701	8255	519212	185281	880	0	144	5
SP37	4643037	3527621	1064823	6624	349624	666063	1540	0	1311	7
SP38	4159775	3319762	628727	6083	342638	242853	5389	2261	479	4
SP39	3931912	2840786	228841	2607	195223	15756	5769	0	200	3
SP40	4770060	2992303	622902	16713	179118	342193	15685	0	3390	4
SP41	4849893	3264386	678818	11305	464220	169614	9499	0	2815	5
SP42	3469522	2200183	66645	6298	46725	4519	1649	0	118	3
SP43	3917963	2218912	461267	16457	110080	206185	18313	0	99	12
SP44	4109295	3351431	511830	1197	467694	7975	5019	10713	19	3
SP45	4230790	3243435	511783	3353	356945	124171	4286	0	210	11
SP46	3181949	2124491	59863	5568	2947	29728	1794	0	431	5
SP47	3414671	2376752	287398	3127	108505	150531	4863	0	3731	13
SP48	3430250	2152348	77709	6728	742	45430	6694	0	676	8
SP49	3076385	1962889	154398	7627	0	94919	6057	5226	255	6
SP50	2867783	1965626	72605	4468	24487	0	23414	0	340	0
SP51	4181778	2963079	479914	9516	143009	299530	14	0	17	28
SP52	4269721	3642875	592766	1714	505400	59852	10082	0	16	3
SP53	3638891	2240385	82204	4105	27525	14323	9117	5344	68	1
SP54	2516869	1615783	50067	3896	9528	2404	5666	0	7634	1
SP55	4849874	4449218	798063	4688	769991	663	10235	0	121	2
SP56	3304364	2899770	511032	2733	462071	25673	3235	3523	131	7
SP57	4409543	3723327	637365	8402	552605	52296	9619	0	1737	2
SP58	3986156	3504429	578610	2747	547211	1232	13997	2158	241	3
SP59	4345041	3860655	769231	3929	594727	157753	3884	0	46	3
SP60	3519597	2418885	111895	5052	23	36470	1806	0	324	8
