# Supplementary material for: Exploring the Diversity of the Human Blood Virome
Source: Viruses. 2021 Nov 21;13(11):2322. doi: 10.3390/v13112322 (PMC8621239; doi:10.3390/v13112322)
Supplement: Supplementary file 1 [file viruses-13-02322-s001.zip › Supplementary_Table_S6.xlsx]

## Sheet: Hoja1
Supplementary Table S3. Summary of the best blastp hits for the six putative ORFs found at the new microvirus sequence.
ORF	Length (aa)	best hit (Accession number)	Query cover (%)	identity (%)
ORF1	531	Major capsid protein (AXH73967)	100	60.3
ORF2	319	Replication initiator protein (AXH73970)	100	54.1
ORF3	224	DNA pilot protein (QJB19348)	85	49.5
ORF4	157	Internal scaffolding protein (AXH73969)	94	48.3
ORF5	97	Non-estructural protein (QJB19603)	80	48.7
ORF6	39	Hypothetical protein (QJB18752)	100	61.5
