# Supplementary material for: Exploring the Diversity of the Human Blood Virome
Source: Viruses. 2021 Nov 21;13(11):2322. doi: 10.3390/v13112322 (PMC8621239; doi:10.3390/v13112322)
Supplement: Supplementary file 1 [file viruses-13-02322-s001.zip › Supplementary_Table_S7.xlsx]

## Sheet: Hoja1
Supplementary Table S5. List of anellovirus isolates downloaded from Genbank. Accession number, isolate name, anellovirus genus, and origin are indicated. The last column shows the number of sequences from our study clustering with each particular isolate. *Isolates identified as potential novel species from our previous study [18].
Accession number	Isolate name	Genus	Origin	Sequences clustering from our study
KJ082064	TTV-Hebei-1	TTV	China	1
AB025946	TTV19-SANBAN	TTV	Japan	3
AY666122	HEL32	TTV	Finland	13
AF261761	PMV	TTV	United Kingdom	1
AF435014	KAV	TTV	Germany	1
AB041007	VT416	TTV	Japan	4
AF348409	TCHN-B	TTV	China	2
AF345526	TCHN-A	TTV	China	15
AF345523	TCHN-C1	TTV	China	5
AB041958	Mf-TTV3	TTV	Japan (macaque)	0
AB064607	JT34F	TTV	Japan	1
AB060597	SAa-01	TTV	Japan	25
AB060594	SAa-10	TTV	Japan	6
AB049608	s-TTV_CH71	TTV	Japan (Chimpanzee)	0
AB041959	Mf-TTV9	TTV	Japan (Macaque)	0
AB041957	Pt-TTV6	TTV	Japan (Chimpanzee)	0
AB037926	s-TTV_CH65-1	TTV	Japan (Chimpanzee)	0
AB028668	TJN01	TTV	Japan	2
AB038621	TTVyon-KC009	TTV	Japan	18
DQ187006	TTV9-BM1C-18	TTV	United States	0
AX025830	TTV17-SENV-G	TTV	Italy	0
AX025718	TTV18-SENV-C	TTV	Italy	20
KP296857	VWP00522.2	TTV	Saint Kitts and Nevis (African green monkey)	0
KP296856	VGA00120.1	TTV	Gambia (African green monkey)	0
KP296853	VGA00123.3	TTV	Gambia (African green monkey)	0
KP296854	VGA00154.2	TTV	Gambia (African green monkey)	0
MW455346	P1-c2*	TTV	Spain	0
MW455455	P2-c10*	TTV	Spain	10
MW455379	P3-c6*	TTV	Spain	0
MW455393	P7-c2*	TTV	Spain	5
MW455435	P9-c4*	TTV	Spain	2
MW455417	P8-c4*	TTV	Spain	3
MK212031	vzttmv4	TTMV	Viet Nam	0
KY462770	SHA	TTMV	China	0
KX810064	Emory2	TTMV	United States	1
KX810063	Emory1	TTMV	United States	0
KU041847	222	TTMV	China	4
JX134046	TTMV_LY3	TTMV	France	6
JX134044	TTMV_LY1	TTMV	France	0
MH017563	BNI-700835-G3-CSF	TTMV	Ghana	0
MH017546	BNI-700620-G1-CSF	TTMV	Ghana	1
AB038625	TLMV-CLC062	TTMV	Japan	2
EF538882	LIL-y3	TTMV	France	1
EF538881	LIL-y2	TTMV	France	2
EF538880	LIL-y1	TTMV	France	3
KM259874	ALH8	TTMV	Spain	0
KM259873	ALA22	TTMV	Spain	0
AF291073	PB4TL	TTMV	France	0
AB041963	Pt-TTV8-II	TTMV	¿?(Chimpanzee)	0
AB041962	TGP96	TTMV	Japan	0
AB038630	TLMV-NLC026	TTMV	Japan	0
AB038629	TLMV-NLC023	TTMV	Japan	6
AB038627	TLMV-CLC156	TTMV	Japan	1
AB026931	TLMV-CBD279	TTMV	Japan	10
AB026929	TLMV-CBD203	TTMV	Japan	0
KF764701	D11	TTMV	Netherlands	0
KY856742	zhenjiang	TTMV	China	0
LC381845	KS025	TTMV	Japan	0
MH648907	ctcf040	TTMV	United States	3
MH648989	ctga035	TTMV	United States	6
MH648910	ctcd026	TTMV	United States	0
MH649141	ctbc019	TTMV	United States	2
MH648986	ctbd020	TTMV	United States	0
MH648912	ctea38	TTMV	United States	0
MH649017	ctbb016	TTMV	United States	4
MH649029	ctbi042	TTMV	United States	0
MH649114	ctbf050	TTMV	United States	1
MH648966	ctei055	TTMV	United States	0
MH649209	ctbg056	TTMV	United States	1
MH648982	ctbf014	TTMV	United States	5
KT027936	Cpz1cl2	TTMV	Czech Republic (Chimpanzee)	0
KT027938	Cpz2cl2	TTMV	Czech Republic (Chimpanzee)	0
KT027941	GorMcl4	TTMV	Czech Republic (Gorilla)	0
MW455358	P1-c16*	TTMV	Spain	0
MW455453	P1-c22*	TTMV	Spain	0
MW455381	P3-c8*	TTMV	Spain	4
MW455388	P5-c2*	TTMV	Spain	0
MW455402	P7-c12*	TTMV	Spain	0
MW455403	P7-c14*	TTMV	Spain	1
MW455409	P7-c21*	TTMV	Spain	2
MW455424	P8-c16*	TTMV	Spain	3
MW455427	P8-c22*	TTMV	Spain	0
MW455431	P8-c26*	TTMV	Spain	1
MW455445	P10-c9*	TTMV	Spain	1
AB449062	Pt-TTMDV210	TTMDV	Japan (Chimpanzee)	1
AB303566	MDJN97	TTMDV	Japan	2
AB303564	MDJN69	TTMDV	Japan	2
AB303562	MDJN51	TTMDV	Japan	3
AB303561	MDJN47	TTMDV	Japan	1
AB303560	MDJN14	TTMDV	Japan	0
AB303559	MDJN2	TTMDV	Japan	0
AB303558	MDJN1	TTMDV	Japan	8
AB303554	MDJHem3-2	TTMDV	Japan	0
AB303553	MDJHem3-1	TTMDV	Japan	3
AB303552	MDJHem2	TTMDV	Japan	1
AB290917	MD1-032	TTMDV	Japan	2
EF538876	6PoSMA	TTMDV	France	0
EF538875	2PoSMA	TTMDV	France	0
AB290919	MD2-013	TTMDV	Japan	0
MW455361	P1-c19*	TTMDV	Spain	1
MW455362	P1-c23*	TTMDV	Spain	0
MW455378	P3-c5*	TTMDV	Spain	0
MW455394	P7-c3*	TTMDV	Spain	1
MW455406	P7-c18*	TTMDV	Spain	5
MW455410	P7-c22*	TTMDV	Spain	3
MW455412	P7-c24*	TTMDV	Spain	2
MW455436	P9-c5*	TTMDV	Spain	1
MW455450	P12-c3*	TTMDV	Spain	1
