# Supplementary material for: Exploring the Diversity of the Human Blood Virome
Source: Viruses. 2021 Nov 21;13(11):2322. doi: 10.3390/v13112322 (PMC8621239; doi:10.3390/v13112322)
Supplement: Supplementary file 1 [file viruses-13-02322-s001.zip › Supplementary_Table_S8.xlsx]

## Sheet: Hoja1
Supplementary Table S6. Pairwise nucleotide identity matrix obtained using ORF1 from TTV sequences belonging to reference species and sequences described in our previous study [18].
	TTV31-Hebei1	TTV6-KAV	TTV7-PMV	TTV9-BM1C18	P8-c9	P10-c4	P7-c2	TTV10-JT34F	P8-c4	P10-c6	P7-c9	TTV1-VT416	P8-c3	P9-c1	P10-c5	P9-c6	TTV3-HEL32	P1-c17	P10-c2	P4-c1	P8-c13	P2-c4	P1-c14	P3-c2	P10-c7	P4-c3	P7-c16	TTV2-CH71	TTV4-PtTTV6	TTV5-TCHNC1	P8-c2	P11-c1	P7-c8	P3-c3	P7-c4	TTV13-TCHNA	P8-c5	P6-c1	P6-c2	P11-c2	P8-c8	TTV14-CH651	TTV15-TJN01	P8-c10	P1-c3	P12-c2	P1-c2	P8-c20	TTV18-SENVC
TTV31-Hebei1	100.001
TTV6-KAV	63.601	100.001
TTV7-PMV	63.501	66.001	100.001
TTV9-BM1C18	60.901	63.901	63.701	100.001
P8-c9	60.801	61.301	60.701	69.401	100.001
P10-c4	62.201	61.301	61.301	68.001	88.001	100.001
P7-c2	63.401	62.501	62.401	68.901	69.701	69.601	100.001
TTV10-JT34F	62.601	62.401	62.501	68.601	68.401	69.001	67.301	100.001
P8-c4	62.701	62.001	63.501	67.501	68.001	68.601	66.901	68.501	100.001
P10-c6	61.201	63.401	62.301	66.101	67.901	69.101	65.601	69.701	77.001	100.001
P7-c9	62.101	63.201	62.701	65.701	68.601	69.501	66.501	69.601	77.201	93.801	100.001
TTV1-VT416	62.101	62.501	60.301	61.301	60.701	60.501	62.401	61.601	60.901	62.301	61.701	100.001
P8-c3	61.901	61.901	61.901	62.001	62.301	61.901	61.701	62.701	62.201	61.401	60.501	74.401	100.001
P9-c1	62.501	62.101	60.801	62.501	61.601	60.301	60.801	62.701	61.301	61.401	61.901	73.701	91.301	100.001
P10-c5	63.901	62.701	62.201	61.001	63.001	62.501	60.901	62.501	62.701	61.801	60.701	74.401	91.901	95.401	100.001
P9-c6	62.601	61.701	60.901	62.701	61.001	61.601	60.401	62.901	60.801	61.901	61.601	73.301	75.401	74.701	75.101	100.001
TTV3-HEL32	61.301	63.501	61.501	61.901	61.001	62.101	61.701	63.001	62.301	61.601	61.401	68.401	66.901	67.501	67.901	67.101	100.001
P1-c17	61.201	60.601	62.501	61.601	62.701	61.501	62.601	62.201	62.401	59.801	60.401	67.601	66.301	66.801	66.501	67.501	72.301	100.001
P10-c2	59.901	61.201	62.601	61.601	61.601	62.201	63.201	61.701	63.501	60.801	61.601	67.201	67.301	66.401	67.101	66.501	72.301	94.301	100.001
P4-c1	61.301	60.601	62.301	62.001	64.001	62.701	63.401	62.101	63.101	60.401	60.601	67.901	67.501	68.001	67.701	67.001	72.401	93.901	94.401	100.001
P8-c13	61.601	60.801	62.201	61.001	61.601	62.201	61.801	63.101	62.301	60.501	60.601	67.301	67.101	67.301	67.401	67.101	72.001	93.101	93.701	94.201	100.001
P2-c4	60.801	60.801	61.901	61.401	60.301	62.201	61.401	63.301	62.801	61.001	59.701	68.401	67.301	66.701	67.601	67.801	71.001	87.901	87.701	88.201	87.201	100.001
P1-c14	62.201	62.401	61.801	63.101	61.501	62.101	62.601	63.101	62.801	59.801	61.501	69.201	67.801	68.601	68.601	67.801	70.801	70.501	70.001	70.101	70.001	69.701	100.001
P3-c2	62.001	63.601	63.401	63.901	63.201	62.101	64.001	61.501	63.701	59.801	60.201	66.901	66.901	67.601	67.601	67.501	71.001	70.301	70.701	71.601	70.701	70.701	87.601	100.001
P10-c7	62.401	64.001	62.601	63.501	64.301	62.901	63.401	62.401	64.501	61.701	61.201	68.101	66.401	67.101	67.301	67.401	70.201	70.601	70.401	71.501	70.201	71.701	87.501	97.401	100.001
P4-c3	62.901	62.501	62.201	61.501	61.701	61.801	63.901	62.201	63.701	61.001	61.901	68.201	68.001	68.401	68.701	68.301	71.101	70.501	69.701	69.901	69.401	70.301	85.001	86.201	85.801	100.001
P7-c16	62.801	62.501	61.701	61.301	62.501	62.501	63.501	60.801	62.501	61.101	61.601	67.501	67.601	68.301	68.401	67.201	70.601	70.801	70.301	70.301	71.101	69.801	85.101	85.401	85.401	95.901	100.001
TTV2-CH71	61.601	61.701	60.901	62.301	61.801	61.001	61.501	60.501	62.801	60.101	60.601	66.401	67.501	66.701	67.301	68.001	68.901	66.601	67.301	67.301	67.201	65.901	68.201	68.201	68.301	67.201	67.701	100.001
TTV4-Pt-TTV6	62.001	61.901	63.201	62.401	62.201	61.701	62.401	62.401	61.701	60.501	60.801	63.401	66.101	64.901	64.901	64.701	65.401	65.101	65.201	65.101	64.401	64.501	66.501	66.101	65.801	65.001	66.301	67.701	100.001
TTV5-TCHNC1	61.601	62.401	62.201	60.801	62.201	63.101	61.901	61.401	61.801	62.101	61.101	64.201	67.501	65.501	67.201	67.001	66.701	63.801	63.301	63.501	63.201	64.601	67.501	67.701	67.901	68.201	67.701	66.201	63.201	100.001
P8-c2	63.001	63.101	61.901	62.201	62.501	62.701	62.501	61.801	62.501	61.101	61.901	64.001	66.301	65.801	66.101	67.101	67.601	64.901	63.901	65.501	65.301	65.201	67.901	67.601	67.501	67.701	68.301	66.501	63.101	94.801	100.001
P11-c1	63.101	62.301	62.401	61.701	61.501	63.101	62.701	62.301	62.401	60.901	61.201	63.901	67.201	65.501	66.301	66.001	68.601	65.201	65.001	64.701	65.001	64.901	66.601	66.601	66.101	67.901	66.901	66.901	63.701	94.601	97.001	100.001
P7-c8	65.101	63.301	62.201	61.301	61.501	62.001	62.901	62.401	61.801	60.501	61.401	68.801	64.301	64.301	66.201	65.701	67.001	66.101	64.701	66.201	65.101	64.801	67.601	67.001	66.401	66.701	67.401	65.801	64.201	71.201	73.401	74.701	100.001
P3-c3	63.501	61.501	62.801	61.201	62.701	61.801	62.601	61.801	62.801	61.601	62.201	65.101	64.901	64.401	64.801	65.201	65.701	64.901	65.201	65.501	65.101	65.301	65.501	65.301	65.701	65.601	65.301	65.001	64.301	71.401	71.701	72.201	71.501	100.001
P7-c4	64.901	60.001	62.401	61.901	61.801	61.501	61.501	62.701	63.801	61.601	62.901	64.701	65.601	65.101	65.601	65.801	65.301	64.801	63.901	64.301	64.301	65.301	66.501	65.501	66.301	67.001	67.001	65.301	66.401	71.501	72.201	71.501	71.701	86.401	100.001
TTV13-TCHNA	60.501	59.401	59.101	60.801	58.501	60.301	59.801	58.101	57.601	59.901	60.601	59.501	60.701	59.301	59.401	61.601	61.101	59.901	61.501	61.401	60.701	60.601	62.301	61.401	61.801	62.101	62.101	62.101	60.601	60.101	59.501	61.101	61.301	60.001	60.401	100.001
P8-c5	59.301	60.101	59.901	61.601	59.801	60.201	59.201	58.901	59.001	60.801	60.101	59.801	61.301	59.801	60.301	60.601	60.601	60.001	60.601	61.601	59.901	61.701	62.101	61.901	61.501	62.001	60.801	63.301	61.501	60.201	59.801	61.901	60.101	61.101	60.101	95.701	100.001
P6-c1	61.701	59.001	59.901	61.001	61.201	61.601	59.901	60.301	58.701	60.301	58.501	60.001	61.701	61.601	62.301	60.801	62.901	62.101	62.901	61.001	61.801	61.801	61.701	61.201	60.401	60.301	60.301	61.101	62.601	62.001	60.301	63.001	60.401	60.701	61.101	83.301	85.501	100.001
P6-c2	61.501	59.901	60.001	59.701	59.601	60.701	59.301	61.901	59.701	59.501	60.301	59.201	61.001	59.801	61.001	62.501	61.001	61.801	62.901	62.401	62.701	61.101	61.101	61.401	60.501	62.101	61.301	61.401	62.401	62.301	61.201	61.201	60.801	60.201	62.801	78.601	79.401	79.801	100.001
P11-c2	61.201	58.901	60.001	60.101	59.701	60.901	59.501	60.801	59.301	58.601	60.701	60.801	61.601	60.201	61.501	61.601	60.601	61.901	62.801	61.901	63.101	61.901	61.501	60.901	60.301	61.701	61.201	62.401	62.501	61.101	61.801	61.601	60.901	59.801	61.901	78.801	79.301	80.001	98.001	100.001
P8-c8	61.101	61.301	60.501	59.801	60.001	60.101	59.501	60.001	59.401	61.701	61.601	59.901	61.301	61.401	61.101	60.701	61.801	62.101	62.301	62.401	62.101	61.501	62.001	60.601	61.001	61.801	61.501	62.001	59.901	61.501	59.501	62.001	61.801	61.601	63.001	78.601	79.601	79.101	79.601	79.601	100.001
TTV14-CH651	60.201	60.001	60.701	58.301	59.001	61.701	60.301	61.301	59.601	61.501	59.601	60.701	61.101	59.501	60.401	60.301	62.201	61.301	60.901	62.501	61.301	60.301	61.401	62.301	61.101	61.701	61.101	62.201	62.101	63.001	61.801	61.501	61.901	62.501	63.001	66.501	65.901	67.301	66.801	66.801	67.801	100.001
TTV15-TJN01	61.401	59.001	60.501	61.201	60.301	61.301	61.401	60.801	61.001	59.201	60.701	59.401	59.601	60.201	59.601	59.601	61.201	59.801	60.501	60.801	60.501	59.701	63.201	61.901	61.701	61.801	62.701	60.901	62.201	62.101	61.601	62.101	61.401	61.101	60.601	63.201	62.601	61.901	63.001	63.101	62.701	62.601	100.001
P8-c10	62.001	58.501	60.801	62.201	61.501	61.201	60.201	60.401	60.501	59.901	60.301	60.401	59.401	60.101	60.901	59.301	61.101	60.901	62.501	62.201	61.301	59.701	61.201	61.901	62.001	62.401	62.401	61.701	62.201	61.201	62.101	62.201	61.501	60.901	61.301	62.701	63.701	62.401	62.701	63.201	63.301	62.501	93.001	100.001
P1-c3	61.601	59.701	62.001	62.601	60.501	61.501	61.401	60.301	61.901	60.901	60.801	60.301	62.401	62.601	62.501	60.301	62.201	59.301	59.001	59.301	60.401	60.201	64.101	62.701	63.701	62.401	61.601	62.601	62.201	62.401	59.901	60.501	62.501	60.401	62.801	63.201	63.501	62.801	63.401	63.601	63.501	62.701	78.801	78.201	100.001
P12-c2	61.401	61.301	60.901	61.201	61.501	61.901	61.101	59.701	62.401	61.401	60.901	59.801	63.001	62.901	62.501	61.901	62.101	60.101	61.101	60.701	60.901	60.901	64.501	63.701	62.801	62.601	62.001	63.101	61.301	61.101	60.501	60.301	62.101	60.801	62.001	63.301	63.401	63.501	62.801	63.201	63.601	62.301	79.101	78.601	96.401	100.001
P1-c2	61.901	60.701	61.701	60.801	61.401	60.201	59.701	61.001	60.901	60.201	60.501	59.701	60.201	61.201	61.901	60.701	61.101	61.701	61.701	62.001	62.101	61.401	60.901	61.101	61.001	60.901	61.501	62.301	62.001	61.701	61.401	61.301	60.201	60.201	61.701	60.701	61.701	62.401	62.701	63.001	62.701	61.101	67.601	67.401	68.301	68.701	100.001
P8-c20	63.701	61.601	61.401	62.701	60.201	61.301	61.101	61.901	62.601	60.801	60.901	60.001	61.101	60.401	60.401	60.201	62.101	62.701	62.201	64.101	63.201	62.501	62.601	63.901	63.601	64.401	63.101	62.401	61.801	63.701	62.501	64.701	62.801	62.001	61.801	62.801	64.101	63.001	65.001	65.001	63.301	62.901	68.701	68.301	67.701	68.401	69.001	100.001
TTV18-SENVC	62.901	60.101	59.601	63.701	60.601	59.501	61.301	60.301	61.801	60.401	60.901	60.901	62.101	61.101	62.401	59.501	63.601	61.401	61.901	60.901	61.901	62.401	62.301	61.901	62.001	62.201	62.401	61.201	62.601	62.001	61.901	62.801	61.401	62.801	63.101	62.201	63.201	64.001	64.701	63.801	63.301	63.301	65.301	66.201	65.601	64.901	67.201	68.401	100.001
P1-c13	61.701	61.901	61.001	60.901	60.801	61.701	60.701	60.501	62.901	61.401	62.401	63.001	62.601	62.201	62.201	61.901	63.101	62.001	61.801	60.601	61.401	62.001	62.101	61.701	63.101	63.101	62.301	62.301	61.801	62.301	61.101	60.101	60.701	63.601	63.701	62.001	63.201	63.301	63.401	63.301	64.101	63.101	68.001	67.801	68.201	68.101	66.501	65.901	79.801
P5-c1	61.801	62.301	61.201	61.601	62.601	60.001	60.901	60.301	62.701	61.801	61.101	62.301	63.901	63.401	63.001	62.401	63.401	64.501	62.801	62.501	62.901	62.001	63.301	62.801	62.301	62.901	62.801	64.001	62.301	61.201	61.601	60.601	61.901	63.801	62.801	61.401	62.801	63.501	62.501	62.301	63.101	64.601	67.401	66.401	68.301	67.801	67.601	66.401	79.601
P1-c6	61.001	61.301	60.301	62.601	61.801	62.101	61.301	60.101	61.601	62.701	61.601	60.401	62.601	62.801	62.101	61.701	62.401	61.301	60.901	63.001	61.401	61.701	61.901	61.801	61.901	61.601	61.401	63.101	60.701	60.901	61.801	61.801	62.401	61.001	61.101	61.301	62.601	62.901	61.301	62.501	62.801	63.301	65.901	65.701	65.401	65.601	67.701	66.001	73.601
P8-c1	60.601	60.701	60.101	61.701	60.801	61.401	61.901	60.801	62.601	62.801	62.501	61.501	63.001	62.801	61.801	60.901	62.401	61.401	62.401	62.101	62.201	61.501	61.101	61.801	62.001	61.201	60.901	63.201	61.201	59.401	60.601	60.601	61.901	59.901	60.801	62.201	63.601	62.301	62.401	63.901	63.501	63.201	66.801	66.201	65.801	65.701	68.301	66.001	73.901
P3-c7	61.001	60.501	61.001	60.701	60.201	61.101	60.801	60.401	61.901	62.601	62.301	61.201	62.301	61.901	61.801	60.801	62.301	61.501	61.601	61.401	61.601	61.601	60.701	61.701	61.601	60.501	60.701	62.701	60.101	60.501	61.501	62.101	61.601	59.701	60.201	61.201	61.901	63.001	62.201	61.601	62.501	61.901	66.701	65.201	64.701	65.701	67.201	65.601	73.201
TTV17-SENVG	62.601	62.601	60.901	60.101	58.901	59.601	60.301	60.101	62.401	61.201	62.501	61.701	61.701	61.901	62.801	61.601	61.201	62.201	62.701	62.301	61.801	60.601	61.101	62.201	62.301	62.501	61.901	59.501	61.501	63.701	62.101	62.101	63.501	61.401	61.601	61.901	62.701	63.001	62.901	62.501	63.701	63.301	66.101	65.601	66.301	66.601	66.501	66.501	66.101
TTV19-SANBAN	60.301	58.701	61.301	61.101	63.901	61.601	60.601	60.001	61.901	61.401	60.101	59.501	61.201	60.701	61.101	58.801	62.801	63.601	62.101	63.901	62.301	63.001	62.201	62.201	61.001	61.201	61.901	61.901	60.101	61.201	61.601	61.601	60.601	59.901	60.601	63.901	63.901	62.901	63.501	63.301	62.701	63.101	64.301	62.001	64.601	64.701	63.901	64.301	64.201
P3-c1	61.401	60.401	61.801	62.901	61.801	61.301	61.001	61.501	61.301	60.401	60.701	60.501	61.501	62.201	61.401	60.201	61.901	60.201	60.401	61.401	60.701	59.901	63.101	63.201	62.901	62.101	62.401	62.601	62.101	61.101	62.001	62.101	60.801	60.501	61.901	63.501	63.701	64.301	64.401	63.801	64.101	63.801	64.701	64.601	64.901	64.401	65.901	65.101	64.901
P7-c1	62.201	61.901	58.601	61.601	61.701	59.901	60.301	60.501	59.901	58.601	59.301	61.501	62.201	60.801	62.201	61.101	63.401	62.901	62.301	62.501	61.901	62.401	63.201	62.001	62.301	63.401	62.201	62.301	62.801	62.901	63.001	63.001	61.701	61.201	60.801	61.901	62.301	63.501	63.801	63.601	63.301	62.701	66.401	66.201	65.701	66.301	64.401	64.801	64.301
P3-c6	63.201	61.101	62.801	60.601	60.601	60.801	61.001	60.501	60.801	60.001	60.001	59.701	60.701	60.401	60.301	61.901	61.701	60.901	60.601	61.101	61.101	61.101	61.301	61.101	61.701	62.201	63.001	61.401	62.601	61.201	61.001	62.001	61.701	60.801	61.501	62.001	64.301	62.701	61.901	61.501	62.401	61.001	64.201	64.501	64.101	63.301	64.301	65.501	63.401
TTV20-SAa10	60.201	60.901	62.301	62.201	59.701	60.701	60.901	61.101	61.001	60.001	60.701	60.701	62.101	61.301	60.701	59.101	60.201	59.301	59.401	60.301	61.101	59.601	60.701	61.101	61.101	61.301	60.501	61.601	61.501	60.901	60.901	61.401	61.601	62.101	60.901	60.701	61.301	62.101	61.901	61.901	61.801	62.701	63.101	62.401	63.901	64.101	62.001	62.901	63.901
P1-c10	62.501	61.401	62.201	62.901	62.401	61.901	63.101	61.101	63.801	60.501	61.901	61.301	61.301	60.901	60.801	61.201	60.701	59.801	60.901	60.401	61.201	59.801	60.701	61.901	62.001	62.501	62.701	60.901	61.301	59.601	59.701	59.401	60.901	62.201	61.301	61.501	62.901	64.301	62.201	62.501	63.101	62.201	63.501	64.001	64.401	64.701	62.201	61.901	62.201
P2-c5	59.801	57.401	61.601	62.201	61.301	60.801	60.401	63.101	62.101	60.101	60.601	59.601	61.601	61.601	61.601	59.801	62.801	62.501	62.601	63.601	62.401	62.101	61.001	60.901	60.801	61.901	60.301	61.601	61.801	61.501	60.101	61.601	60.101	59.701	61.001	62.901	64.301	64.701	65.701	65.901	64.501	62.101	63.201	64.401	63.901	64.301	63.601	63.601	64.501
P12-c1	60.901	57.901	61.001	61.501	60.701	60.601	60.201	62.801	62.101	61.501	62.501	60.001	61.401	60.501	61.301	61.201	62.401	61.501	62.001	62.101	61.701	61.401	60.101	61.801	60.601	61.201	60.301	62.601	62.701	61.801	61.001	61.701	59.901	60.201	61.101	64.001	64.901	65.401	65.801	65.201	64.101	62.301	63.101	64.101	65.001	65.101	63.401	63.501	64.301
P9-c4	63.301	60.401	61.201	63.501	59.901	59.601	61.601	62.101	62.001	61.401	61.801	61.701	61.401	61.201	61.401	60.701	62.401	62.701	62.601	62.401	63.001	62.401	62.601	61.101	62.401	61.401	59.801	61.701	62.001	61.701	61.001	63.301	62.501	61.101	63.501	66.101	66.001	64.901	64.801	64.301	64.101	64.101	64.801	64.201	65.301	65.301	62.701	63.801	62.901
P7-c6	61.101	60.701	59.901	60.901	60.601	60.001	61.001	61.401	60.601	61.301	60.601	60.801	60.801	60.901	60.801	60.601	63.201	62.301	61.201	62.001	62.801	60.801	60.601	59.301	59.201	61.901	61.701	61.801	62.001	60.901	61.701	61.801	59.301	60.201	61.201	64.601	65.401	64.601	64.401	65.001	64.701	63.701	64.001	63.201	64.801	64.301	64.301	62.401	62.901
TTV21-TCHNB	61.301	61.001	62.601	61.401	60.601	60.301	61.201	61.901	61.001	61.701	61.401	61.801	60.601	59.501	60.101	60.701	60.501	59.501	59.701	60.001	59.201	60.701	59.201	60.801	61.101	60.701	60.601	59.801	60.901	61.401	60.301	61.401	61.801	60.001	60.601	62.201	62.401	61.201	60.701	60.901	61.001	59.701	62.001	60.901	62.801	62.501	61.201	61.701	63.001
P4-c2	61.401	61.401	62.201	61.301	60.701	60.301	63.101	61.101	62.601	61.701	61.601	62.201	61.301	60.901	62.401	62.201	62.701	61.701	60.001	60.801	60.801	61.301	61.701	61.001	61.001	61.401	61.801	60.701	62.201	63.401	61.601	61.501	61.401	61.501	62.001	63.201	63.601	62.701	62.201	61.401	61.801	61.301	63.501	63.001	63.301	63.201	61.501	62.001	62.601
P7-c10	61.601	60.301	60.901	61.601	59.901	59.801	62.101	61.901	62.101	60.801	62.001	61.401	59.801	58.701	59.901	62.901	63.101	60.701	59.701	60.701	61.101	60.201	62.401	61.101	61.601	61.001	61.601	59.801	61.501	61.901	60.801	61.401	62.801	62.101	60.401	61.601	62.201	62.701	62.901	62.201	62.001	60.701	62.101	63.201	62.301	63.101	62.301	65.101	62.401
TTV24-SAa01	61.401	60.401	59.701	60.401	61.001	59.001	62.601	60.801	61.501	58.801	59.601	60.201	62.401	61.001	62.101	61.201	62.501	61.901	61.401	61.801	61.601	60.801	62.601	61.401	61.101	62.601	61.301	62.401	62.901	62.001	62.801	62.101	63.101	60.801	61.201	62.301	63.001	62.901	63.001	63.201	62.001	61.301	64.701	64.501	64.901	64.201	64.801	63.601	63.701
P1-c1	60.301	60.901	60.101	60.801	60.801	60.901	60.801	61.301	61.501	61.001	61.401	61.401	61.701	61.901	61.501	60.301	61.801	60.701	61.701	60.701	60.601	61.201	61.801	62.701	62.901	62.201	63.301	61.301	62.401	61.601	61.801	62.701	63.201	61.101	62.401	62.301	63.401	62.801	63.601	63.701	64.201	62.101	64.801	65.401	65.301	65.001	66.201	64.101	63.601
P2-c6	60.101	60.001	61.001	61.301	61.001	59.101	61.001	62.601	61.301	59.801	59.701	61.301	61.301	60.801	61.701	60.901	63.301	60.201	60.801	60.601	60.101	61.501	61.901	61.501	62.101	61.201	62.001	62.501	62.001	62.701	62.501	63.201	62.001	62.101	62.501	61.201	62.201	63.801	64.501	64.001	62.601	62.701	64.901	65.001	65.501	64.601	65.901	63.901	64.601
P7-c5	60.901	60.801	60.301	61.301	59.701	60.201	60.201	61.101	61.701	60.001	59.501	60.701	60.801	61.001	61.001	60.901	63.501	60.201	60.601	60.001	59.801	61.701	61.101	61.001	62.601	62.401	62.801	61.901	61.301	61.901	61.901	61.501	61.901	62.401	62.801	62.901	63.401	64.201	65.501	64.901	62.801	62.001	64.701	64.001	63.901	63.901	65.701	64.501	64.101
P1-c4	61.001	59.201	60.601	60.101	59.301	58.901	62.301	59.401	61.401	60.301	60.501	59.501	60.701	59.401	59.901	60.801	60.101	62.201	60.701	60.201	61.001	58.901	58.801	58.701	58.901	60.101	60.701	59.801	61.401	63.501	61.701	61.901	60.501	62.301	62.101	60.901	61.301	61.901	62.301	61.301	62.301	62.301	66.001	65.601	64.801	64.001	65.201	62.801	61.801
P1-c7	59.901	58.901	58.301	60.201	59.401	59.001	61.101	60.601	60.001	59.901	60.101	58.001	59.901	57.301	58.301	58.701	60.601	59.101	58.701	57.901	58.701	58.701	60.001	61.501	61.701	60.501	60.001	61.001	60.101	61.601	61.401	60.301	60.501	59.701	61.301	60.801	61.701	62.001	61.801	62.001	61.701	62.501	64.101	64.001	64.201	63.501	64.501	61.301	62.001
P2-c10	60.501	60.301	56.901	60.201	58.001	60.701	60.601	59.101	59.901	60.401	60.001	57.601	60.101	58.001	57.901	59.401	60.601	59.101	59.401	59.001	59.401	58.801	61.501	61.101	60.601	60.001	59.501	61.401	58.901	60.901	61.501	60.201	58.901	59.701	60.301	61.001	60.301	61.201	62.801	63.301	62.201	60.501	63.401	63.501	63.901	63.101	64.701	61.801	62.701
P1-c8	61.601	61.401	59.301	62.001	59.601	60.501	61.201	60.001	60.901	60.401	61.301	61.001	60.801	61.201	61.101	61.901	60.901	61.401	60.001	59.901	61.301	60.201	62.101	61.601	60.901	62.201	63.601	61.901	63.501	60.501	62.001	62.701	63.101	61.501	63.901	61.501	62.201	63.401	62.001	62.301	60.601	62.601	63.901	63.201	63.801	63.401	64.201	63.301	62.301
P2-c9	62.001	61.401	60.301	62.501	61.201	62.201	60.201	60.601	62.101	60.801	59.301	60.401	58.901	59.401	59.201	61.601	61.501	60.901	59.001	61.301	61.701	60.801	59.701	60.701	60.501	59.801	62.401	61.901	63.701	61.401	60.701	59.801	60.801	61.601	62.601	62.901	63.201	62.901	61.701	60.901	63.301	60.901	63.801	65.201	64.501	64.801	63.301	64.201	62.401
TTCV-1VWP00522.2	60.301	57.501	59.101	57.101	59.001	58.601	58.101	59.501	60.201	59.801	61.201	59.101	58.401	59.401	59.001	60.301	59.201	57.701	59.501	58.701	59.001	58.401	58.601	60.001	59.701	60.701	59.201	60.001	60.101	62.101	60.601	57.301	60.001	59.701	60.401	60.601	59.901	59.601	59.601	59.201	58.701	61.401	59.601	58.601	58.201	59.301	57.901	60.401	58.101
TTV25-Mf-TTV9	59.101	59.701	59.401	60.701	61.801	60.401	58.601	60.401	59.701	59.301	59.301	58.101	59.701	60.001	60.201	60.701	61.801	61.101	60.701	61.801	61.201	60.101	60.301	60.201	60.401	59.201	60.001	62.601	61.501	61.601	59.401	59.801	59.801	60.701	60.101	57.501	59.301	59.201	60.301	59.801	59.101	57.901	58.701	58.701	59.401	59.701	58.301	60.101	59.001
TTCV2-VGA00120.1	58.701	58.801	57.601	59.301	59.301	59.401	58.201	59.001	60.001	58.901	59.701	59.401	59.701	59.701	60.201	60.101	58.601	58.501	60.001	59.101	58.601	58.701	59.201	60.301	60.601	59.101	60.001	60.501	58.801	61.501	59.101	59.601	59.001	58.001	58.401	60.201	58.701	58.101	60.301	59.601	60.501	57.801	60.001	59.001	57.101	57.901	60.001	61.201	59.101
TTV29-TTVyonK-c009	60.801	59.101	59.501	59.001	60.201	59.501	59.801	60.001	60.001	58.201	58.401	60.901	61.601	60.401	60.901	61.501	60.001	61.101	60.201	61.101	61.101	59.401	60.301	61.701	60.801	61.201	60.901	60.601	59.101	60.901	61.201	60.601	61.201	60.501	61.401	60.101	60.801	61.501	60.301	59.801	59.901	61.101	62.901	62.401	60.901	62.001	59.601	61.101	59.601
P9-c2	61.901	60.401	59.701	59.401	59.401	59.801	60.501	59.601	60.601	59.101	58.701	60.301	59.301	60.701	60.001	61.201	60.601	61.801	60.901	61.101	61.301	60.101	60.901	60.001	59.701	63.101	62.501	61.201	60.401	62.601	61.801	60.801	61.801	60.901	60.201	60.501	60.901	61.901	60.601	61.501	60.701	59.801	60.101	61.001	60.101	60.001	60.401	60.601	61.201
P10-c3	63.701	60.601	59.901	59.201	60.301	61.301	59.901	59.901	60.801	59.101	59.001	60.601	59.601	59.901	59.701	61.001	60.601	61.401	61.001	61.001	61.201	60.001	61.001	60.401	59.801	63.401	62.801	60.501	60.401	62.601	61.201	60.501	61.401	60.601	61.401	60.801	61.301	61.901	61.301	61.501	60.401	59.701	60.601	60.901	60.401	60.401	60.401	61.501	61.101
P1-c20	61.501	60.301	59.501	59.901	59.801	62.301	59.901	61.201	61.901	59.801	60.501	59.301	61.201	60.201	60.901	61.801	60.801	60.501	60.801	61.301	60.401	61.301	60.401	59.001	60.501	63.001	63.501	62.101	62.001	60.801	59.301	58.101	59.701	59.501	60.201	61.201	60.901	62.001	60.601	60.401	63.201	59.201	60.201	59.101	60.601	60.401	60.401	60.401	59.001
P2-c7	61.401	60.601	58.901	59.301	59.201	60.601	59.601	59.001	60.601	60.101	59.501	59.901	59.801	58.801	60.101	60.101	61.301	60.201	59.901	60.301	60.701	59.501	60.401	59.701	59.601	62.101	62.301	61.001	59.901	62.001	60.901	60.501	60.101	60.401	61.501	60.301	60.201	61.301	60.701	60.701	61.101	59.901	59.801	60.601	59.901	60.801	59.701	60.301	60.201
P1-c5	62.201	59.401	58.601	59.801	59.901	59.601	59.701	59.701	61.001	59.501	59.501	61.601	61.901	61.301	61.201	59.801	60.701	61.701	60.401	61.601	60.901	58.701	59.801	62.001	61.901	61.801	62.201	61.701	60.201	61.601	61.701	61.001	63.401	61.301	61.701	61.101	61.701	62.301	60.801	60.101	61.701	59.701	60.401	60.001	61.701	61.401	60.301	61.401	60.801
P2-c2	61.601	60.301	59.301	61.001	59.301	60.401	61.301	60.901	60.401	61.201	59.401	60.801	61.001	61.501	61.601	61.301	62.801	62.001	61.201	60.401	59.301	59.901	60.301	61.401	62.001	61.801	62.601	62.501	61.901	62.301	61.601	62.801	61.401	61.501	61.501	59.801	60.701	62.701	61.401	62.101	60.801	60.101	60.701	59.701	60.301	60.601	60.401	62.501	61.601
P12-c4	62.301	62.101	60.901	60.501	61.101	61.801	60.401	58.901	61.901	60.101	61.301	61.601	61.501	61.501	62.101	61.101	63.001	60.801	61.001	60.801	61.201	60.101	61.501	61.401	61.101	62.501	62.601	61.601	60.701	61.201	63.001	61.901	63.301	62.701	62.101	61.301	62.701	61.301	61.801	61.001	62.001	60.301	62.901	61.901	58.701	61.101	62.901	60.101	60.801
P1-c21	61.201	58.901	57.501	59.101	58.101	60.201	59.601	60.001	61.201	60.301	61.601	59.101	60.301	58.801	59.501	58.501	61.601	62.001	62.701	62.201	61.301	60.501	61.701	62.001	62.201	60.701	60.901	62.401	60.801	60.501	61.201	61.701	59.901	60.001	61.101	58.301	59.501	59.401	60.101	59.801	60.101	59.601	60.301	60.001	60.601	60.601	61.001	60.101	60.401
P2-c3	60.701	59.501	58.501	60.201	59.601	60.601	60.801	60.201	61.501	61.801	62.201	60.301	60.801	59.501	59.801	60.101	58.501	60.201	59.201	59.701	58.301	57.901	61.601	62.801	60.801	61.601	60.901	60.101	60.201	60.801	61.601	62.901	62.701	60.101	62.001	59.801	61.701	60.401	59.101	59.601	60.501	58.701	62.901	62.301	61.801	60.501	60.501	62.701	60.301
P1-c18	62.001	58.401	60.201	60.701	59.001	59.801	61.001	61.601	60.801	61.201	61.001	61.501	61.201	61.001	61.501	59.201	60.101	60.301	59.501	59.601	59.601	59.001	60.601	61.001	59.701	59.801	59.801	60.101	60.601	63.001	62.301	62.201	62.201	62.601	59.801	59.401	59.901	60.001	59.401	59.101	58.801	60.901	61.701	61.501	60.501	60.401	58.901	62.001	59.201
TTV26-MfTTV3	58.601	58.901	61.101	59.501	58.301	60.101	60.201	59.801	59.401	59.301	60.001	57.701	57.601	56.901	57.701	57.901	58.801	58.301	58.901	58.501	57.001	58.801	59.001	59.801	59.701	59.301	58.901	60.101	59.101	58.501	59.101	61.201	60.101	59.201	59.201	60.501	60.601	59.201	58.601	58.801	61.401	58.901	60.501	60.201	58.301	58.501	60.101	60.201	60.901
TTCV3-VGA00123.3	60.101	58.801	58.301	59.101	59.901	58.901	58.801	58.701	59.401	58.801	58.501	58.201	58.801	57.901	57.301	57.901	58.401	60.201	60.101	59.601	59.401	60.301	59.501	59.501	60.101	59.801	59.401	62.001	59.401	60.001	57.801	59.601	56.901	58.601	59.801	59.301	59.001	60.801	61.401	61.001	60.501	59.201	60.901	58.601	59.101	59.501	59.801	59.401	58.901
TTCV5-VGA00154.2	60.201	57.801	59.301	58.901	59.401	59.401	58.201	59.101	59.701	59.601	58.701	58.601	59.601	59.401	59.101	58.801	60.401	60.401	59.501	60.701	59.801	60.401	58.901	58.401	58.801	58.701	60.001	60.101	58.601	60.401	59.301	59.201	58.801	58.701	59.001	60.301	60.901	58.501	61.801	60.801	59.001	60.001	59.801	58.801	59.901	61.401	58.901	59.101	58.201
[truncated: 45 more columns]
