# Supplementary material for: Exploring the Diversity of the Human Blood Virome
Source: Viruses. 2021 Nov 21;13(11):2322. doi: 10.3390/v13112322 (PMC8621239; doi:10.3390/v13112322)
Supplement: Supplementary file 1 [file viruses-13-02322-s001.zip › Supplementary_Table_S9.xlsx]

## Sheet: Hoja1
Supplementary Table S7. Pairwise nucleotide identity matrix obtained using ORF1 from TTMV sequences belonging to reference species and sequences described in our previous study [18].
	TTMV6-CBD203	P1-c25	TTMV24-ctbc019	P7-c7	P8-c6	P3-c8	P7-c14	TTMV8-PB4TL	TTMV9-ClC062	P1-c12	P5-c2	TTMV27-ALA22	TTMV12-LIL-y3	P9-c3	P1-c24	TTMV26-SHA	TTMV7-CLC156	P8-c22	TTMV4-Pt-TTV8-II	TTMV23-Emory1	Cpz1cl2	TTMV19_LY3	P3-c4	TTMV20-ctga035	P8-c25	TTMV5-TGP96	TTMV22-vzttmv4	TTMV21-ctcd026	TTMV13-zhenjiang	TTMV14-BNI-700620-G1-CS	TTMV16-ALH8	TTMV15-LY1	TTMV17-ctcf040	TTMV18-D11	TTMV1-CBD279	P7-c23	P6-c3	P8-c24	P8-c16	P3-c9	TTMV31-ctbb016	P8-c17	P10-c8	TTMV32-222	TTMV28-BNI-700835-G3-CSF	P8-c26	TTMV34-ctbf050	TTMV2-NLC023	P4-c4
TTMV6-cBD203	100.001
P1-c25	83.701	100.001
TTMV24-ctbc019	67.901	67.801	100.001
P7-c7	68.601	66.601	88.001	100.001
P8-c6	64.901	64.401	64.101	64.401	100.001
P3-c8	64.901	65.001	65.601	66.501	70.201	100.001
P7-c14	63.301	63.501	64.201	63.001	66.001	63.201	100.001
TTMV8-PB4TL	63.601	64.501	62.901	63.301	63.801	64.401	63.401	100.001
TTMV9-CLC062	64.301	64.901	65.101	63.501	63.001	62.301	63.901	65.901	100.001
P1-c12	61.101	62.201	62.401	63.001	60.601	63.101	62.601	67.101	67.201	100.001
P5-c2	64.301	61.201	64.101	63.301	63.301	62.601	64.501	66.101	67.101	74.701	100.001
TTMV27-ALA22	64.001	65.601	64.201	63.401	64.201	64.801	63.101	66.501	67.401	66.201	65.501	100.001
TTMV12-LIL-y3	65.301	64.301	62.701	63.201	62.901	61.201	62.201	64.701	60.501	62.601	61.701	62.501	100.001
P9-c3	64.401	64.001	63.101	63.201	62.801	61.501	62.401	64.301	62.101	61.901	62.701	62.801	93.701	100.001
P1-c24	64.901	64.201	63.001	63.301	63.901	60.701	62.201	63.201	61.601	62.501	62.601	62.601	87.001	88.501	100.001
TTMV26-SHA	64.501	65.401	61.701	62.301	64.601	65.501	62.301	64.701	65.101	62.301	64.401	64.001	66.001	66.701	65.601	100.001
TTMV7-CLC156	64.601	65.601	63.801	65.301	62.801	63.101	62.601	64.201	62.801	63.001	63.701	63.901	63.301	63.801	63.401	63.001	100.001
P8-c22	62.801	63.901	61.401	61.501	63.501	62.901	62.301	63.101	63.201	62.301	63.501	63.201	62.701	62.301	62.701	62.901	64.601	100.001
TTMV4-Pt-TTV8-II	63.901	63.401	64.801	64.401	64.601	65.501	62.301	64.401	63.801	62.101	63.201	64.201	61.901	62.901	63.601	63.001	64.001	63.701	100.001
TTMV23-Emory1	61.401	61.701	63.701	64.601	65.001	65.101	63.501	63.401	62.701	60.901	62.801	61.101	63.201	61.601	60.601	61.201	63.901	63.501	63.301	100.001
Cpz1Cl2	64.301	63.501	64.301	63.101	62.901	66.201	62.201	64.801	62.301	61.901	63.801	64.901	63.101	63.001	62.801	64.001	63.601	61.201	66.401	66.101	100.001
TTMV19-LY3	62.801	64.101	62.901	62.701	62.401	63.101	61.501	63.001	61.301	61.701	62.301	63.001	61.801	61.301	61.401	63.401	62.901	62.201	64.701	63.701	64.701	100.001
P3-c4	62.701	62.501	62.901	63.101	63.901	61.601	61.701	63.501	62.401	61.901	63.801	64.601	61.101	61.401	61.001	62.401	61.901	62.601	63.701	62.201	61.301	69.201	100.001
TTMV20-ctga035	64.001	62.401	63.201	64.501	63.901	64.201	65.001	62.601	62.901	63.401	64.201	63.001	61.801	61.301	61.901	62.101	63.801	61.901	63.701	63.201	63.901	63.501	63.801	100.001
P8-c25	62.201	63.601	61.401	61.301	60.401	60.001	59.801	62.101	62.601	63.201	62.601	61.301	61.701	64.701	63.001	62.101	62.701	62.201	64.701	62.401	64.201	65.101	61.301	69.201	100.001
TTMV5-TGP96	60.001	60.701	60.801	60.201	60.301	63.901	60.401	63.001	62.501	60.301	63.301	63.101	60.801	61.001	63.101	63.801	62.201	61.801	63.801	63.301	63.401	60.601	64.001	60.401	61.701	100.001
TTMV22-vzttmv4	60.601	60.601	61.001	60.101	62.101	60.901	62.301	62.801	61.101	60.101	61.801	62.901	59.901	61.901	61.701	61.201	64.001	63.301	63.201	64.901	62.001	62.901	62.801	63.201	62.601	65.601	100.001
TTMV21-ctcd026	62.901	64.401	64.001	64.101	63.601	63.701	62.901	62.101	65.501	63.901	65.501	63.701	62.501	63.601	64.301	62.201	65.201	60.901	65.001	65.101	63.501	61.601	63.001	63.301	63.701	65.601	65.401	100.001
TTMV13-zhenjiang	61.701	62.901	62.101	63.301	64.501	62.101	63.601	62.901	62.701	62.901	62.001	63.801	61.001	61.301	60.801	62.501	62.301	62.601	63.601	64.601	62.901	62.501	63.801	63.201	62.301	62.901	63.401	64.001	100.001
TTMV14-BNI-700620-G1-cSF	62.601	62.001	59.801	61.201	62.901	63.801	62.501	63.701	60.601	62.201	65.301	63.501	61.101	60.701	61.001	61.601	63.401	63.501	65.601	63.101	64.701	62.701	62.601	63.601	62.901	63.701	63.601	65.401	64.601	100.001
TTMV16-ALH8	60.901	62.801	62.101	60.501	60.801	63.601	64.201	62.901	60.601	61.301	63.601	63.501	62.301	62.201	62.701	62.901	63.301	64.701	64.401	63.401	62.201	63.801	62.001	62.701	61.301	62.701	63.501	63.501	62.601	65.901	100.001
TTMV15-LY1	61.101	62.801	62.501	62.401	61.901	62.601	62.501	63.501	61.701	61.101	60.801	63.801	61.601	61.401	61.301	62.301	61.601	62.501	63.601	63.801	62.301	65.101	62.101	62.701	63.201	61.501	62.701	62.001	64.001	63.601	65.201	100.001
TTMV17-ctcf040	62.801	63.201	61.801	60.801	63.801	63.101	62.401	62.701	60.301	61.801	63.101	61.801	61.101	62.401	62.401	62.901	63.501	63.701	63.301	63.301	62.801	62.401	63.701	63.201	62.401	62.901	63.001	63.801	62.001	62.601	63.001	64.101	100.001
TTMV18-D11	61.301	61.201	60.801	61.201	64.001	62.701	63.201	63.601	61.001	63.701	63.101	63.701	61.501	62.201	62.501	62.901	64.801	63.301	65.001	63.701	63.801	65.101	63.101	60.801	60.601	64.501	61.201	62.801	64.001	64.401	63.901	64.501	65.801	100.001
TTMV1-CBD279	62.501	62.801	62.001	62.501	60.201	64.201	63.501	65.001	63.401	61.501	62.301	62.601	62.101	63.801	63.101	63.301	63.701	62.201	64.001	62.101	61.501	63.001	61.901	61.601	62.301	62.201	62.501	62.401	63.001	63.801	62.201	61.501	63.701	63.701	100.001
P7-c23	61.601	62.601	63.001	62.001	62.301	62.801	63.101	63.301	61.001	63.301	61.501	63.801	63.001	62.901	63.501	62.201	63.601	63.001	62.701	60.101	61.701	63.201	62.201	63.401	63.701	62.401	63.301	63.901	62.001	63.701	61.101	61.501	63.001	62.101	77.101	100.001
P6-c3	62.801	63.301	63.201	62.101	63.701	64.701	64.201	64.201	60.601	61.101	63.001	63.301	59.701	60.801	62.001	61.701	65.901	63.401	63.001	62.101	64.301	63.001	62.801	64.001	61.101	62.101	62.901	63.901	62.401	64.801	65.101	62.001	62.001	61.101	70.701	70.701	100.001
P8-c24	63.901	63.201	62.701	61.601	64.401	65.401	64.901	62.901	62.701	62.301	61.501	62.701	62.101	62.401	61.701	62.601	65.001	64.101	64.301	63.001	63.801	61.801	63.101	62.501	61.701	63.401	60.701	63.701	62.801	64.401	62.701	63.601	63.501	60.701	71.401	70.401	87.101	100.001
P8-c16	61.001	62.501	63.401	62.001	61.301	62.601	64.901	64.001	61.801	62.301	64.601	62.801	63.701	64.601	62.801	62.801	64.001	60.801	62.701	61.701	62.901	61.801	62.601	62.701	62.201	63.101	63.401	63.701	61.901	63.001	63.101	63.201	62.101	65.001	68.201	67.301	68.701	68.001	100.001
P3-c9	61.101	62.501	62.801	60.901	61.501	63.101	62.901	64.501	62.501	60.801	63.401	63.601	63.101	64.901	63.201	62.701	64.901	63.901	62.401	62.701	62.201	62.001	62.601	61.001	62.101	63.101	61.501	63.401	62.501	64.201	62.001	63.501	62.601	63.301	68.301	67.801	67.501	68.801	95.101	100.001
TTMV31-ctbb016	62.601	64.401	63.301	63.201	64.601	62.501	64.001	64.401	63.301	62.601	65.201	64.401	62.701	63.401	64.301	66.301	64.801	62.101	62.301	62.701	62.401	63.101	63.001	64.001	64.301	64.301	63.001	60.801	62.601	62.001	63.501	64.101	62.801	63.301	65.501	64.601	64.901	66.401	63.901	64.201	100.001
P8-c17	62.301	65.001	62.901	62.101	62.101	62.201	63.701	63.401	63.101	62.901	65.301	64.501	61.901	61.901	62.401	65.801	63.801	62.801	63.401	62.901	62.901	63.601	62.401	63.601	62.401	63.101	62.101	62.901	63.301	63.701	63.301	63.401	63.701	64.201	66.201	64.801	65.201	65.901	63.501	63.201	89.901	100.001
P10-c8	61.501	62.701	63.401	62.901	64.201	62.001	64.701	63.501	63.601	62.901	65.601	63.801	61.601	61.101	61.901	65.401	64.501	60.901	62.001	64.201	62.401	62.301	63.801	63.301	62.801	64.301	63.301	61.501	62.601	63.001	62.701	61.901	63.401	63.601	65.701	64.001	67.201	65.401	65.301	63.601	86.801	85.801	100.001
TTMV32-222	61.701	63.001	63.401	63.001	62.201	63.001	63.301	64.201	62.401	62.701	62.101	62.501	61.601	61.101	62.501	63.301	64.001	63.201	63.001	63.701	64.801	62.901	63.301	61.601	60.601	62.901	63.601	63.501	62.001	63.101	62.301	62.001	64.501	63.201	66.401	66.401	68.001	66.701	66.701	66.901	66.601	66.601	67.201	100.001
TTMV28-BNI-700835-G3-cSF	62.401	61.601	64.201	62.801	60.901	63.701	63.401	62.301	60.701	62.101	62.001	61.901	60.101	61.701	60.801	62.001	63.901	62.601	63.001	62.701	63.501	61.301	60.801	62.201	62.001	61.201	61.901	64.001	61.901	61.301	63.901	63.101	64.101	63.201	64.801	65.101	65.801	65.901	66.901	67.401	64.601	65.301	64.401	66.001	100.001
P8-c26	61.401	61.401	62.701	61.901	62.401	61.801	63.201	63.201	61.801	60.801	61.601	62.501	58.601	60.401	61.701	61.701	62.501	63.401	63.301	64.201	62.401	62.001	63.201	63.201	63.301	61.001	62.901	62.201	62.601	63.201	62.301	62.501	61.401	61.101	64.001	63.501	62.801	64.601	63.501	64.801	63.201	62.901	62.901	63.401	67.701	100.001
TTMV34-ctbf050	62.101	62.501	63.201	62.201	62.801	62.101	62.801	64.901	62.401	62.701	61.601	64.101	61.001	61.201	61.901	64.201	62.501	60.801	64.001	63.701	63.901	61.701	63.401	63.301	61.201	64.301	64.401	60.501	62.801	63.101	62.001	63.701	63.501	62.501	64.201	64.001	65.301	66.401	67.201	66.901	66.201	65.801	65.401	64.401	67.101	65.301	100.001
TTMV2-NLC023	62.301	62.201	62.801	61.801	62.501	61.301	62.701	65.001	62.301	61.501	63.701	62.401	60.701	61.801	61.501	62.201	63.301	61.401	62.701	61.901	63.301	60.501	61.001	62.901	63.801	60.901	63.001	62.301	64.001	63.801	64.501	62.701	64.801	62.601	64.301	63.101	65.601	64.501	63.401	63.301	64.201	65.101	64.201	65.301	66.901	63.401	63.701	100.001
P4-c4	64.401	62.201	62.501	60.801	61.101	60.901	63.101	63.501	62.801	61.601	64.501	63.101	61.801	61.801	62.901	62.001	65.201	63.201	62.101	61.901	64.401	61.201	62.701	65.301	61.901	61.301	62.901	64.701	62.801	64.801	64.201	62.001	64.301	62.501	64.801	62.501	67.201	66.401	63.501	62.901	65.501	65.201	64.001	63.601	65.801	63.601	64.001	85.901	100.001
P1-c22	60.901	62.701	61.301	60.201	62.501	62.801	63.701	63.701	62.101	61.801	61.001	62.501	60.301	60.901	60.601	62.001	63.901	59.901	63.701	62.101	63.601	62.101	63.501	63.101	60.301	62.801	60.901	61.401	63.801	62.101	61.601	63.001	59.201	60.601	64.401	63.601	62.901	65.701	63.701	62.801	63.701	62.301	62.801	63.001	64.801	62.901	65.301	68.901	68.501
TTMV3-NLC026	61.101	63.101	62.701	64.601	62.701	62.001	64.501	63.801	63.701	61.201	60.701	64.601	63.201	62.501	62.401	62.501	63.201	61.801	61.901	62.601	63.401	61.501	62.601	63.001	62.801	61.801	62.401	63.901	62.401	63.001	62.501	62.801	63.501	62.001	64.101	64.301	64.201	65.101	65.801	64.301	64.501	63.601	63.001	64.501	64.801	63.301	65.001	64.201	65.301
TTMV29-Emory2	63.301	62.501	62.401	64.301	63.601	62.801	62.401	62.801	63.301	62.701	63.901	62.101	62.501	61.501	61.901	63.001	63.201	62.801	62.901	63.001	62.101	64.301	62.601	63.901	62.601	63.701	63.001	62.901	62.101	64.901	64.201	62.701	61.101	63.901	64.001	63.201	65.601	65.401	63.101	61.201	64.301	63.501	63.001	64.301	64.501	63.001	64.301	63.501	65.201
TTMV10-LIL-y1	60.501	61.201	60.801	60.501	61.801	60.201	64.601	64.601	59.801	61.301	61.601	62.801	60.501	61.701	62.001	61.001	62.401	63.101	61.201	61.201	62.401	61.401	60.701	61.801	62.001	63.401	63.801	61.201	60.601	63.401	62.301	62.801	63.001	62.401	62.101	61.101	63.301	62.001	64.101	62.601	62.101	63.701	62.001	63.801	63.201	63.201	63.301	61.301	63.601
P1-c15	61.801	60.501	61.701	60.601	61.801	60.801	62.901	63.401	59.401	60.901	62.701	61.801	61.301	62.501	61.701	61.401	63.001	63.101	62.001	60.601	61.801	61.101	61.001	62.001	62.901	63.401	63.801	61.801	61.601	64.101	62.801	63.201	62.301	62.301	62.601	60.801	63.101	62.301	62.301	63.801	62.201	64.401	61.701	64.001	62.501	63.401	61.901	62.101	62.901
Cpz2Cl2	62.401	61.001	61.601	62.101	61.701	61.501	62.601	64.201	62.001	61.201	61.101	63.001	60.601	61.601	60.701	61.001	64.101	62.601	63.001	61.501	63.301	61.201	62.001	60.801	62.701	63.701	61.101	62.801	60.801	63.001	62.001	62.201	61.201	61.101	63.201	62.501	66.001	63.601	63.101	63.701	61.601	63.901	63.801	62.201	61.501	63.401	62.801	63.301	62.801
TTMV35-ctei055	60.601	62.601	62.901	62.301	63.701	63.501	62.301	63.901	62.601	63.601	64.401	62.401	60.701	62.001	61.201	62.601	63.101	62.301	65.701	63.701	61.901	61.401	62.701	61.001	63.501	61.401	64.101	60.001	61.101	64.501	61.201	63.701	63.201	64.801	62.201	64.001	61.901	63.901	63.601	63.201	62.901	62.901	62.201	63.701	65.501	65.401	65.401	63.801	64.401
P10-c9	59.401	61.701	60.701	61.001	62.401	62.401	61.801	61.201	60.901	61.401	61.001	60.901	60.801	61.101	64.401	60.601	62.801	62.101	64.701	61.001	61.201	63.101	61.501	63.901	63.001	61.301	63.301	63.001	61.201	64.301	62.201	62.901	61.401	62.301	61.601	61.801	61.201	62.101	63.801	64.601	60.701	61.701	61.901	64.301	63.601	61.301	62.501	61.101	61.801
TTMV11-LIL-y2	61.901	61.701	61.801	63.701	61.901	60.901	61.901	62.001	60.301	59.201	60.501	60.901	60.001	59.701	59.901	62.301	62.701	60.601	63.801	60.601	62.301	61.701	61.401	60.101	59.601	62.601	62.701	61.801	61.601	63.601	62.401	60.601	61.401	60.701	61.901	62.801	64.901	64.301	63.601	63.601	63.301	64.001	62.701	61.301	61.801	62.601	63.201	61.401	63.101
P8-c23	62.201	64.001	62.001	61.801	63.401	63.601	64.101	64.001	62.301	62.201	61.301	62.501	62.401	63.001	63.001	64.301	65.001	61.801	65.001	60.701	64.001	64.101	62.401	60.801	62.201	64.401	61.901	62.201	61.501	62.101	65.701	62.801	62.501	61.901	65.701	63.001	63.401	64.601	62.101	63.101	64.501	63.501	64.901	64.201	63.201	63.101	65.001	63.001	66.301
P7-c21	60.001	62.101	61.301	61.401	63.501	61.101	61.401	62.201	59.901	60.301	59.201	59.301	60.601	60.501	60.001	60.901	61.401	60.201	61.901	61.301	62.201	60.301	62.501	61.701	60.901	60.101	61.301	63.601	61.401	62.401	61.201	62.301	61.901	62.001	61.101	61.701	62.701	61.501	61.801	62.401	63.001	63.901	62.501	63.301	61.201	60.101	64.101	60.501	62.501
TTMV33-ctbi042	63.601	64.201	61.201	61.201	61.401	63.001	61.901	63.001	63.401	62.501	62.601	63.601	62.601	62.501	62.201	63.501	63.801	63.501	62.401	63.801	61.601	62.001	62.901	61.701	62.001	63.401	62.301	59.901	64.501	64.701	62.701	63.201	61.801	60.601	62.801	62.801	64.501	62.401	64.301	64.001	62.201	60.901	62.801	63.901	62.401	63.201	65.401	62.401	61.901
P1-c16	63.701	62.501	63.601	61.401	64.101	64.501	63.801	61.201	60.901	61.701	63.601	63.301	62.701	61.601	62.901	62.801	63.701	65.001	64.001	63.101	63.701	62.401	63.201	62.501	63.201	63.701	64.201	63.001	64.301	65.101	64.201	61.501	64.101	63.301	63.501	63.201	65.701	65.001	63.301	63.101	61.601	62.801	62.201	64.001	62.901	61.901	62.801	61.201	63.901
GorMCl4	61.501	63.401	64.701	64.601	62.901	61.401	63.601	60.401	63.301	63.401	64.401	61.701	63.501	62.801	63.301	61.701	63.401	62.601	64.901	63.601	64.801	63.001	63.401	63.401	62.201	62.901	62.501	62.901	64.201	64.801	62.901	63.401	60.901	60.901	63.901	64.101	62.701	62.001	64.001	64.701	62.901	62.801	64.001	63.801	63.601	62.801	63.901	64.401	65.101
TTMV25-ctbd020	62.301	61.301	61.201	60.701	61.201	61.601	61.501	60.401	63.101	62.501	63.901	61.401	61.101	60.801	62.101	61.301	60.201	60.301	61.001	62.401	60.101	60.801	61.601	62.001	61.401	63.901	63.001	61.301	62.301	63.101	61.501	61.801	62.101	64.501	61.801	60.501	62.001	61.801	62.001	62.701	62.701	63.501	63.701	62.701	62.201	65.301	61.601	62.701	61.701
TTMV30-ctea38	60.501	60.201	62.801	61.401	61.201	59.401	61.401	61.801	60.701	62.201	62.101	60.201	61.201	60.301	58.601	60.901	63.901	61.301	61.301	60.901	60.601	61.101	61.601	61.801	60.001	63.101	61.701	62.301	59.701	60.101	59.601	59.301	60.501	62.001	61.101	63.301	61.601	60.601	62.501	61.101	59.701	60.401	62.501	62.501	61.001	63.001	62.801	62.101	61.101
P8-c21	61.301	60.001	61.701	61.801	61.801	60.101	62.801	62.301	59.801	60.801	61.001	61.101	60.301	61.001	59.701	59.601	62.201	61.001	61.201	59.701	61.501	60.301	60.601	62.001	60.101	62.201	60.101	62.601	61.501	61.101	58.901	58.801	60.001	60.101	62.701	62.401	62.101	59.901	59.901	59.901	60.401	60.501	61.501	61.601	60.701	62.401	62.001	60.501	61.001
TTMV36-KS025	63.101	60.901	60.401	60.601	60.701	62.501	63.301	62.001	61.601	63.601	62.001	65.201	62.301	62.601	62.101	62.401	62.301	61.301	63.101	64.501	62.501	61.901	60.701	61.101	59.701	63.001	62.601	62.501	62.801	64.101	61.601	62.401	61.901	59.401	62.901	62.701	61.601	61.701	62.601	63.101	62.301	62.001	60.801	63.201	61.001	62.501	62.801	60.001	62.801
P7-c12	62.601	59.901	62.101	61.901	62.201	63.101	62.001	63.201	62.201	62.301	61.901	64.501	59.801	58.501	59.301	62.501	62.401	60.501	61.001	61.501	60.401	58.501	59.401	61.901	62.001	60.401	61.001	59.501	62.701	64.001	60.401	61.901	63.401	61.301	64.101	62.101	61.101	60.601	61.801	61.801	62.201	60.801	61.501	61.801	62.101	60.201	63.001	61.601	61.601
TTMV38-ctbf014	61.301	61.901	62.401	61.501	62.201	62.401	60.901	62.101	62.901	62.601	63.401	63.101	63.401	62.001	62.001	60.801	62.001	62.701	63.001	61.601	63.101	60.101	63.501	62.401	62.801	61.601	60.301	62.201	61.701	63.401	63.001	63.101	62.501	62.601	63.701	60.301	60.201	60.701	65.201	63.601	65.501	65.401	63.301	63.501	62.801	62.701	62.601	62.601	63.801
TTMV37-ctbg056	63.801	62.101	61.601	62.601	63.501	62.701	60.801	63.301	62.201	63.301	63.901	63.001	61.801	62.201	61.701	61.501	62.601	61.801	61.301	63.801	60.501	63.101	63.901	62.501	61.701	63.701	64.501	62.101	63.101	63.301	62.601	66.101	61.701	64.101	63.801	62.901	64.201	62.601	64.201	64.001	64.201	65.001	64.201	64.601	65.301	64.801	65.501	63.701	62.201
[truncated: 21 more columns]
