# Supplementary material for: Exploring the Diversity of the Human Blood Virome
Source: Viruses. 2021 Nov 21;13(11):2322. doi: 10.3390/v13112322 (PMC8621239; doi:10.3390/v13112322)
Supplement: Supplementary file 1 [file viruses-13-02322-s001.zip › Supplementary_Table_S10.xlsx]

## Sheet: Hoja1
Supplementary Table S8. Pairwise nucleotide identity matrix obtained using ORF1 from TTMDV sequences belonging to reference species and sequences described in our previous study [18].
	P1-c23	TTMDV5-MDJHem2	P7-c3	P7-c22	P1-c19	TTMDV8-MDJN1	P8-c18	P7-c25	P1-c27	P9-c5	TTMDV7-MDJHem32	TTMDV12-MDJN51	P12-c3	TTMDV14-MDJN97	P7-c17	TTMDV6-MDJHem31	P2-c8	TTMDV10-MDJN14	P1-c26	TTMDV1-MD1032	P7-c24	TTMDV3-2PoSMA	TTMDV4-6PoSMA	P3-c5	TTMDV2-MD2013	TTMDV13-MDJN69	TTMDV9-MDJN2	TTMDV11-MDJN47	P7-c19	P7-c18	P7-c20	TTMDV15-Pt-TTMDV210
P1-c23	100.001
TTMDV5-MDJHem2	64.201	100.001
P7-c3	61.901	67.601	100.001
P7-c22	62.901	65.701	67.101	100.001
P1-c19	64.401	64.801	67.901	66.901	100.001
TTMDV8-MDJN1	64.901	65.801	64.801	64.601	64.101	100.001
P8-c18	63.401	65.601	66.001	66.301	64.801	76.901	100.001
P7-c25	63.301	66.901	64.801	64.701	65.001	76.301	88.501	100.001
P1-c27	65.901	66.301	66.001	64.801	64.601	71.901	71.601	72.101	100.001
P9-c5	62.501	65.101	66.501	65.801	65.901	67.701	69.301	69.401	67.301	100.001
TTMDV7-MDJHem32	63.901	63.201	64.401	63.901	65.501	63.601	64.401	65.901	63.101	64.501	100.001
TTMDV12-MDJN51	61.601	63.701	64.101	62.701	63.501	63.501	64.001	61.401	64.501	63.801	65.301	100.001
P12-c3	61.301	63.201	64.801	61.501	64.001	64.301	64.201	64.401	64.001	62.601	65.801	66.301	100.001
TTMDV14-MDJN97	62.501	63.001	64.701	63.101	64.901	65.101	65.801	64.701	64.001	66.001	64.801	64.401	66.201	100.001
P7-c17	62.001	64.401	65.801	62.901	65.401	63.601	63.501	63.501	63.801	65.001	65.701	64.101	63.301	70.201	100.001
TTMDV6-MDJHem31	63.801	65.101	65.101	61.901	65.501	64.801	65.801	64.901	65.001	63.801	63.901	62.201	62.401	65.101	65.001	100.001
P2-c8	61.601	63.901	64.001	62.401	65.101	64.601	64.101	64.101	63.601	63.401	64.201	64.801	61.801	64.001	65.801	72.101	100.001
TTMDV10-MDJN14	63.001	64.501	64.201	62.401	65.201	63.101	64.101	63.801	63.501	63.001	61.701	62.901	62.801	62.201	63.601	64.301	65.101	100.001
P1-c26	62.401	65.601	63.901	63.601	64.301	63.401	65.401	64.601	64.401	63.301	64.101	61.001	62.601	64.901	63.301	65.601	63.501	77.301	100.001
TTMDV1-MD1032	62.701	65.601	65.601	65.201	64.201	65.101	65.101	66.801	65.201	65.901	63.601	62.201	64.401	64.101	63.801	66.901	65.101	64.401	65.301	100.001
P7-c24	62.701	62.501	61.701	63.601	64.301	65.701	65.401	64.801	63.401	65.301	62.501	61.501	62.601	63.701	62.801	64.101	63.001	64.101	63.201	67.101	100.001
TTMDV3-2PoSMA	63.301	64.601	63.701	63.601	64.801	63.501	63.301	64.601	65.101	65.301	65.401	64.301	62.001	61.801	62.801	63.301	63.301	63.901	63.901	67.301	65.001	100.001
TTMDV4-6PoSMA	64.001	63.401	64.201	64.901	63.701	62.601	64.301	62.101	64.201	64.101	62.801	63.301	63.201	63.901	63.101	63.901	62.301	63.101	63.201	64.001	62.801	66.501	100.001
P3-c5	65.401	64.801	65.201	65.201	65.801	66.001	66.701	67.201	66.001	64.501	65.401	64.101	64.601	66.101	65.501	65.601	63.801	65.301	65.301	64.801	67.001	64.801	66.201	100.001
TTMDV2-MD2013	64.501	63.401	62.301	65.401	65.601	63.801	64.701	63.201	63.701	64.701	63.401	66.101	63.601	65.101	64.701	65.401	64.701	64.001	66.101	66.001	65.801	62.701	64.201	65.701	100.001
TTMDV13-MDJN69	64.101	63.301	63.401	62.801	65.601	63.601	65.201	64.201	64.901	64.501	63.401	62.901	64.701	64.201	63.301	64.001	63.601	62.001	64.901	64.301	64.101	65.001	63.501	65.701	66.601	100.001
TTMDV9-MDJN2	63.701	64.701	64.101	63.401	63.001	62.901	64.401	64.601	63.801	62.401	64.701	63.201	62.701	62.001	63.401	62.701	63.401	62.301	61.401	63.101	63.201	63.301	62.201	64.901	63.501	62.701	100.001
TTMDV11-MDJN47	63.601	63.301	64.201	63.001	64.901	63.101	64.301	64.601	65.701	64.301	64.801	63.001	61.001	62.301	63.801	62.901	61.201	61.801	63.301	62.401	63.301	62.901	64.601	64.001	64.701	63.501	65.901	100.001
P7-c19	63.601	64.401	62.601	64.201	63.301	62.201	64.301	65.201	64.701	65.001	64.201	63.701	61.701	63.901	65.201	62.801	63.001	62.501	63.801	64.301	63.801	63.401	62.501	64.701	63.901	62.801	64.601	71.001	100.001
P7-c18	64.001	64.601	62.201	62.001	62.401	64.201	65.601	65.201	64.001	63.901	64.701	62.001	63.101	64.601	62.801	65.201	63.301	63.701	64.801	65.001	64.001	63.701	63.401	65.001	65.401	61.801	66.801	66.401	67.901	100.001
P7-c20	64.301	66.301	63.901	63.501	64.401	65.701	65.701	66.601	65.501	65.701	64.301	63.401	63.501	64.101	64.101	64.601	62.201	64.801	64.801	64.301	62.401	63.801	61.201	64.301	66.801	64.501	66.501	68.701	67.801	72.501	100.001
TTMDV15-Pt-TTMDV210	60.501	61.201	62.201	61.501	63.101	60.901	62.101	61.101	62.201	62.301	63.001	60.201	61.501	59.901	60.301	61.801	58.401	61.301	61.501	60.901	60.101	61.201	61.901	61.501	61.901	62.401	62.701	61.201	60.401	61.701	61.601	100.001
