# Supplementary material for: Exploring the Diversity of the Human Blood Virome
Source: Viruses. 2021 Nov 21;13(11):2322. doi: 10.3390/v13112322 (PMC8621239; doi:10.3390/v13112322)
Supplement: Supplementary file 1 [file viruses-13-02322-s001.zip › Supplementary_Table_S11.xlsx]

## Sheet: Hoja1
Supplementary Table S9. Pairwise nucleotide identity matrix obtained using ORF1 from TTV sequences belonging to reference species, potential novel species from our previous study [18], and sequences described in the present study.
	SP1-C4	SP52-C1	SP16-C3	SP31-C1	SP45-C9	SP47-C1	SP51-C12	TTV3-HEL32	SP3-C17	SP42-C3	SP31-C3	SP35-C5	SP47-C3	SP60-C3	SP2-C1	SP16-C9	TTV1-VT416	SP20-C2	SP47-C5	SP3-C9	SP55-C1	SP18-C1	SP45-C1	TTV5-TCHNC1	SP60-C2	TTV2-CH71	TTV4-Pt-TTV6	SP3-C1	TTV6-KAV	SP36-C1	SP40-C3	TTV7-PMV	SP11-C1	SP35-C3	SP16-C12	SP24-C3	SP44-C1	SP16-C5	SP24-C6	SP16-C7	SP24-C2	P7-c2	SP51-C1	TTV9-BM1C18	SP15-C2	SP15-C5	P8-c4	SP40-C1	SP24-C4
SP1-C4	100.001
SP52-C1	94.301	100.001
SP16-C3	94.101	94.001	100.001
SP31-C1	93.201	93.201	93.701	100.001
SP45-C9	93.701	93.701	94.101	93.601	100.001
SP47-C1	93.601	94.101	94.101	93.601	94.301	100.001
SP51-C12	92.801	93.001	93.501	93.301	92.701	93.401	100.001
TTV3-HEL32	71.801	71.801	71.301	70.701	72.101	72.501	71.401	100.001
SP3-C17	69.601	69.901	70.101	69.401	70.001	69.901	69.301	71.201	100.001
SP42-C3	70.301	70.201	70.301	69.201	70.301	70.001	69.601	71.101	98.201	100.001
SP31-C3	69.401	69.501	70.301	69.101	70.101	69.301	68.901	71.101	97.701	97.901	100.001
SP35-C5	69.801	70.301	70.301	69.301	70.301	69.901	69.601	69.501	89.401	89.701	89.701	100.001
SP47-C3	69.601	70.901	70.501	70.301	70.701	69.601	69.301	71.001	85.801	85.801	85.701	86.301	100.001
SP60-C3	72.701	73.301	72.901	72.001	72.501	73.601	72.401	71.601	73.801	73.701	73.201	73.501	74.201	100.001
SP2-C1	67.201	66.401	66.501	66.301	66.901	66.801	66.901	68.501	68.501	68.401	67.801	68.201	68.701	65.001	100.001
SP16-C9	67.501	66.901	66.801	66.201	67.401	67.501	66.801	69.001	68.801	68.701	68.301	67.801	68.301	65.201	99.001	100.001
TTV1-VT416	67.601	67.401	67.201	67.201	68.901	67.601	67.301	68.401	69.201	69.301	69.201	67.501	66.701	65.301	85.601	85.101	100.001
SP20-C2	67.501	68.001	68.601	66.801	68.201	67.301	68.001	67.201	67.201	67.601	67.701	66.201	67.601	68.201	74.501	74.101	72.901	100.001
SP47-C5	67.501	66.901	67.001	66.401	67.101	66.501	66.901	67.601	67.701	67.601	67.301	66.901	66.701	67.901	74.701	74.401	74.401	75.001	100.001
SP3-C9	64.701	64.301	65.401	65.201	65.001	64.501	64.901	65.001	66.201	66.701	66.601	65.601	65.801	63.901	65.701	65.301	64.401	65.501	65.401	100.001
SP55-C1	64.001	64.501	65.501	64.401	64.401	64.601	64.701	64.701	66.501	66.401	66.401	65.701	66.801	63.601	64.601	65.401	64.301	66.301	66.301	95.801	100.001
SP18-C1	65.101	65.001	66.001	65.101	65.101	64.801	65.101	66.601	65.901	66.301	65.901	65.201	66.801	64.601	65.201	65.701	64.601	65.901	66.501	85.901	86.101	100.001
SP45-C1	63.601	64.701	65.701	65.301	63.701	64.701	64.801	65.601	65.001	64.301	65.801	63.601	65.201	62.501	64.301	64.501	64.901	65.401	64.801	83.801	84.201	94.101	100.001
TTV5-TCHNC1	62.001	62.801	63.001	63.601	63.001	63.601	63.701	66.701	66.801	67.501	67.001	67.101	68.501	65.601	65.301	66.401	64.201	66.401	67.501	71.001	71.301	71.001	72.801	100.001
SP60-C2	64.401	64.901	65.301	64.501	64.801	65.401	65.001	67.001	67.601	66.901	67.301	66.401	65.701	65.801	65.501	65.301	68.501	66.401	66.401	69.601	70.501	71.401	70.901	70.301	100.001
TTV2-CH71	67.601	67.601	66.501	66.601	66.901	67.301	66.101	68.901	67.501	67.501	67.601	68.801	68.501	66.301	66.401	66.001	66.401	68.001	67.101	65.701	65.701	65.901	64.701	66.201	65.001	100.001
TTV4-Pt-TTV6	64.801	64.701	65.801	64.301	65.201	65.001	64.801	65.401	65.901	66.301	66.201	65.801	65.801	65.901	65.101	64.801	63.401	64.701	64.001	63.801	65.001	65.301	64.301	63.201	64.101	67.701	100.001
SP3-C1	60.801	61.001	61.301	60.601	61.701	61.301	61.201	62.401	62.501	62.301	63.301	63.101	63.701	62.201	62.501	63.101	62.101	61.301	63.001	62.401	61.301	60.801	61.401	62.701	62.301	61.401	62.701	100.001
TTV6-KAV	61.101	61.701	61.001	61.001	61.301	60.601	60.301	63.501	63.101	62.901	63.201	62.901	63.401	63.101	62.601	62.501	62.501	61.501	62.501	61.201	60.601	61.301	61.701	62.401	64.001	61.701	61.901	93.701	100.001
SP36-C1	63.701	64.101	63.801	62.501	63.601	63.501	63.501	65.601	64.801	64.701	65.101	65.401	64.901	63.701	64.501	64.201	62.801	64.301	64.001	61.101	61.701	61.301	61.601	63.801	63.901	64.201	61.801	67.101	67.001	100.001
SP40-C3	60.101	60.401	60.601	59.501	61.001	61.601	61.501	62.401	62.301	62.101	61.601	62.901	62.201	60.601	63.401	63.401	62.501	62.401	60.601	60.801	60.601	62.001	60.901	63.001	61.701	61.201	62.101	66.901	65.701	67.701	100.001
TTV7-PMV	62.701	61.901	62.701	61.601	62.701	62.801	62.001	61.501	62.201	61.801	61.801	61.501	62.001	61.601	61.001	60.901	60.301	62.301	60.501	62.301	62.001	63.001	61.101	62.201	61.601	60.901	63.201	65.801	66.001	65.501	72.701	100.001
SP11-C1	61.001	60.201	61.701	61.101	60.401	61.101	60.301	60.601	62.001	62.501	62.301	61.201	62.201	60.201	63.201	62.401	60.601	62.501	62.901	62.101	62.401	62.601	62.301	62.501	60.001	60.601	61.101	60.601	61.401	63.501	62.501	63.401	100.001
SP35-C3	60.301	60.101	60.501	61.501	60.401	61.201	61.101	59.901	62.501	62.901	62.701	62.201	62.001	61.001	63.401	62.201	61.201	61.901	63.501	61.801	61.801	62.301	62.401	62.401	60.001	61.101	61.901	60.001	60.501	63.101	62.201	63.001	94.701	100.001
SP16-C12	60.601	60.201	61.101	60.801	60.101	60.701	60.401	60.201	63.101	64.301	64.101	62.801	61.801	61.401	62.801	62.801	62.401	62.201	63.701	62.101	62.501	63.401	62.601	64.101	59.301	61.501	61.601	61.501	61.601	63.301	62.401	63.201	92.501	92.601	100.001
SP24-C3	60.701	61.801	60.901	60.801	61.501	61.201	61.001	60.501	63.201	63.701	64.101	62.701	62.801	61.201	62.901	62.901	62.101	61.701	63.601	62.001	63.501	63.701	62.901	63.101	58.801	61.801	61.001	61.601	61.801	63.201	63.101	63.701	92.501	93.101	95.901	100.001
SP44-C1	58.901	59.901	60.901	59.601	61.501	60.901	59.701	61.901	62.601	62.801	62.701	63.701	64.201	62.701	62.201	61.801	61.301	60.701	62.201	63.401	62.701	62.401	61.101	60.501	61.901	61.601	60.201	62.101	62.201	63.701	61.901	63.801	70.201	71.101	71.001	71.101	100.001
SP16-C5	62.301	61.301	62.601	62.401	63.201	62.901	62.401	62.001	62.801	61.901	62.101	61.901	64.001	61.501	60.601	62.001	61.401	62.601	63.501	60.801	61.801	62.401	61.701	61.601	62.801	62.301	63.001	63.201	61.701	64.501	61.601	63.101	67.801	67.601	68.701	68.301	69.801	100.001
SP24-C6	63.201	64.001	65.001	63.401	64.301	63.901	64.101	63.301	63.001	63.301	62.701	63.201	62.101	61.801	62.401	62.001	63.301	62.801	64.001	61.801	62.001	62.501	61.301	62.401	62.201	63.301	64.701	62.401	62.301	64.401	63.101	62.401	68.401	68.401	68.901	69.101	70.201	73.301	100.001
SP16-C7	62.201	62.201	62.601	61.601	62.501	61.701	62.801	62.901	64.301	64.601	63.801	64.701	64.701	62.301	62.701	62.801	62.001	62.001	63.501	62.301	62.901	63.101	62.001	64.301	62.201	63.101	64.301	61.901	62.101	63.901	62.401	63.301	69.601	69.601	70.101	70.301	71.701	72.501	73.201	100.001
SP24-C2	62.901	63.401	63.001	62.401	63.301	62.201	62.801	63.101	62.701	62.101	62.401	62.501	62.701	62.001	63.101	63.601	61.701	61.801	64.201	60.301	60.501	63.301	63.001	61.401	59.701	62.901	62.101	62.201	62.601	63.601	62.601	64.001	69.701	69.901	70.501	69.001	73.001	73.201	72.701	72.801	100.001
P7-c2	61.901	62.101	62.901	60.401	62.101	62.601	62.201	61.701	62.401	62.101	62.901	63.801	64.101	62.101	61.501	62.201	62.401	60.201	61.901	62.401	62.001	62.001	61.301	61.901	61.801	61.501	62.401	63.201	62.501	62.801	63.201	62.401	66.801	67.601	67.101	67.301	70.801	71.701	72.901	74.301	76.601	100.001
SP51-C1	61.801	61.001	62.001	61.501	61.801	61.501	61.201	61.601	63.401	63.901	62.901	63.001	63.101	61.501	62.101	62.101	60.701	59.601	62.301	60.601	62.501	61.301	59.901	63.001	61.501	62.401	61.701	62.901	62.201	63.601	64.001	61.901	69.201	70.101	69.301	69.801	69.001	68.501	69.801	70.801	69.401	69.901	100.001
TTV9-BM1C18	60.601	61.501	61.801	60.501	60.901	62.201	61.501	61.901	63.501	62.901	63.401	61.301	62.501	60.601	62.601	62.501	61.301	60.301	62.201	61.201	60.801	61.201	59.801	60.801	63.301	62.301	62.401	62.901	63.901	64.601	63.401	63.701	67.701	68.301	67.201	67.201	68.101	68.301	71.001	70.701	69.801	68.901	68.101	100.001
SP15-C2	62.701	62.701	63.501	61.801	62.901	62.501	63.201	62.301	64.001	63.101	63.501	63.601	63.101	61.301	62.801	61.901	62.101	61.301	61.801	63.001	63.801	63.601	62.901	63.901	61.801	62.301	60.401	61.901	60.201	65.801	63.001	61.501	67.601	67.301	67.801	67.801	66.301	68.401	68.301	67.401	68.901	66.801	68.001	66.601	100.001
SP15-C5	60.001	59.301	61.001	60.701	60.501	59.801	60.801	60.901	61.901	62.401	61.801	61.801	62.501	62.001	62.301	62.501	63.001	61.201	62.201	63.001	63.001	61.601	61.301	60.801	61.201	61.601	62.001	63.201	63.501	63.801	61.201	63.501	67.701	67.401	68.101	67.501	67.701	67.501	67.401	66.801	70.001	66.601	69.201	66.101	73.201	100.001
P8-c4	63.001	63.201	63.401	62.101	63.601	63.301	62.801	62.301	64.001	64.501	63.801	62.501	64.201	62.401	62.501	62.601	60.901	62.401	62.201	62.901	63.101	63.301	62.301	61.801	61.901	62.801	61.701	62.301	62.001	64.001	62.801	63.501	66.001	65.501	66.801	66.901	69.101	66.401	68.201	67.801	69.601	66.901	67.201	67.501	73.601	76.901	100.001
SP40-C1	61.301	61.801	61.601	60.201	60.201	61.701	60.701	62.401	60.901	61.101	61.101	61.501	62.301	62.001	62.701	62.601	63.201	61.401	62.201	61.601	62.701	62.001	61.901	64.101	61.601	62.601	61.801	62.301	62.601	63.001	62.301	63.101	68.301	68.601	69.201	69.501	68.501	68.901	67.201	67.101	70.301	68.101	69.201	67.001	74.401	75.101	74.701	100.001
SP24-C4	62.301	62.301	62.201	61.401	63.201	62.701	62.101	63.001	62.301	61.901	61.701	61.701	62.701	62.101	63.801	63.501	62.301	62.701	62.401	62.101	61.501	61.401	61.301	61.201	60.601	59.601	61.501	61.601	61.901	62.601	63.701	63.001	69.801	69.701	69.301	68.801	68.101	71.701	69.401	68.701	68.801	67.901	68.601	68.401	70.001	70.101	68.301	70.501	100.001
SP44-C3	61.601	62.801	63.501	62.001	62.801	62.601	61.301	63.201	63.501	63.501	64.201	62.201	61.401	63.201	63.601	64.301	61.901	61.601	62.801	60.301	62.401	63.401	59.901	63.001	63.801	62.401	61.501	63.001	61.601	63.701	63.601	62.201	70.201	70.001	69.901	70.001	68.801	68.801	68.401	66.801	68.301	68.401	68.801	68.401	68.601	68.101	67.201	71.901	69.301
TTV10-JT34F	62.001	62.201	62.901	62.001	61.901	62.201	61.801	63.001	62.701	62.801	62.501	61.601	62.801	62.101	63.601	65.001	61.601	62.601	62.701	60.801	62.201	62.401	60.301	61.401	64.001	60.501	62.401	61.801	62.401	63.501	63.201	62.501	67.401	68.501	68.201	68.801	67.401	67.901	67.901	67.201	67.701	67.301	67.601	68.601	69.701	69.501	68.501	69.901	68.101
SP44-C2	61.801	63.001	63.101	62.501	63.801	63.101	62.601	61.501	62.501	63.201	63.101	63.201	64.301	62.901	62.001	62.001	63.401	63.601	64.801	64.901	64.301	63.901	63.801	62.601	63.201	62.701	63.001	63.201	63.301	65.301	63.401	62.401	63.401	63.301	63.101	62.501	62.101	61.701	64.601	63.101	61.801	62.501	62.701	62.401	62.701	62.701	64.401	62.401	63.901
TTV31-Hebei1	61.201	60.701	60.701	59.001	62.301	60.601	61.101	61.301	62.701	62.801	62.601	62.101	63.501	64.301	63.101	63.201	62.101	62.701	63.101	63.401	64.201	64.101	62.401	61.601	63.301	61.601	62.001	62.801	63.601	64.101	63.401	63.501	62.301	61.901	63.001	62.701	61.601	60.801	62.801	61.901	62.901	63.401	62.101	60.901	62.601	61.601	62.701	61.801	62.501
SP1-C5	60.601	60.601	59.901	61.001	60.401	60.701	60.901	61.301	63.001	63.001	62.301	62.801	61.201	60.401	61.701	61.601	60.901	60.101	61.101	62.301	62.201	61.301	61.601	62.101	61.601	61.901	63.301	60.501	61.101	62.901	60.501	61.801	62.401	61.101	60.801	62.501	61.001	59.701	61.501	62.501	62.201	61.501	61.601	60.601	62.001	60.701	62.601	62.301	62.801
SP60-C1	60.901	60.401	60.401	61.501	60.201	60.501	60.901	61.201	62.901	63.301	62.901	63.101	61.501	60.101	61.001	60.901	61.601	59.601	61.501	61.601	61.801	61.101	61.101	62.001	61.801	61.201	62.501	61.201	60.801	62.001	60.401	61.101	62.701	61.601	62.001	62.801	60.101	59.401	60.701	61.801	61.601	60.801	61.201	59.701	61.301	60.301	62.701	61.001	61.201
SP56-C1	60.201	61.601	61.201	60.701	60.801	60.901	60.801	62.101	61.501	62.801	61.701	62.601	62.301	60.201	61.901	60.701	61.101	60.101	61.001	62.101	62.101	60.601	61.501	61.601	62.601	61.901	61.801	60.601	62.401	62.901	60.801	60.701	62.301	61.701	60.901	61.901	60.501	60.301	60.701	61.501	63.001	62.001	60.501	60.101	62.501	60.401	61.801	61.601	61.501
SP14-C2	61.601	61.201	61.001	62.401	61.201	61.701	61.101	61.801	63.701	64.001	62.701	62.501	62.401	60.201	60.201	59.901	60.201	59.501	61.301	62.201	62.301	61.701	63.401	62.001	62.301	61.201	62.501	61.501	61.601	61.801	60.001	61.101	62.501	60.701	61.301	62.401	62.501	60.901	60.901	63.001	61.601	60.901	62.101	59.801	62.101	60.001	63.501	61.901	60.501
SP14-C5	62.401	62.001	62.901	63.401	62.301	62.601	62.501	63.501	65.101	64.501	64.101	64.201	62.601	61.201	63.001	63.801	64.101	60.201	62.001	61.201	61.201	60.101	62.401	64.901	63.901	64.001	61.401	60.501	60.901	62.401	61.101	62.501	62.401	61.201	64.701	62.201	62.001	61.901	63.001	62.701	60.801	60.901	63.501	61.001	64.701	61.001	63.501	63.201	63.101
SP58-C1	60.201	60.401	60.401	60.901	60.901	60.201	60.201	63.001	63.101	63.501	63.101	61.801	61.701	59.401	61.801	61.001	62.101	59.401	61.101	61.201	61.801	62.201	61.601	61.701	62.601	62.001	62.801	61.401	60.601	61.801	59.901	61.801	60.201	61.001	61.901	61.301	61.401	59.101	61.501	61.901	61.301	61.401	62.101	60.201	62.301	59.501	61.401	62.201	62.201
SP45-C3	60.501	59.301	60.201	60.701	60.301	59.501	59.501	61.801	62.701	62.801	61.801	61.801	61.801	59.801	61.901	61.601	61.201	60.401	61.101	60.401	61.101	61.001	60.801	61.801	63.601	62.701	61.401	61.101	61.401	62.801	59.501	60.501	61.801	61.701	62.501	62.101	61.601	59.701	61.601	62.301	60.101	61.401	62.401	60.701	63.101	59.801	61.201	61.201	62.501
SP48-C1	60.601	60.301	60.801	62.001	61.301	60.801	60.601	62.501	62.301	62.401	62.001	61.901	62.501	59.601	62.101	61.701	61.401	59.701	61.801	61.101	61.201	61.301	61.001	61.401	63.301	62.201	62.301	61.101	61.101	63.301	59.601	59.701	62.401	62.101	62.401	62.001	60.501	59.901	61.301	62.801	60.201	61.801	62.401	60.501	63.001	60.501	62.001	62.001	61.601
SP3-C4	60.901	60.901	60.401	61.801	61.101	60.901	60.801	62.301	62.301	62.501	62.501	61.601	60.901	60.901	61.501	61.601	61.601	60.201	61.001	61.901	62.501	61.101	60.901	61.701	62.401	62.001	61.601	59.701	60.301	62.701	61.301	61.201	61.301	60.301	60.201	60.701	61.401	61.001	61.201	62.501	61.601	61.001	62.001	61.301	62.401	60.301	63.001	61.401	61.701
SP16-C13	59.201	60.101	60.001	60.201	59.401	60.301	59.501	62.101	63.301	63.101	62.501	61.901	61.301	59.401	61.101	61.101	59.801	60.301	60.101	61.301	62.101	61.701	60.901	61.501	63.301	61.201	61.001	60.701	60.801	62.901	61.301	61.501	61.201	60.601	61.001	62.001	60.701	59.901	61.401	61.401	60.801	61.101	61.401	60.801	62.101	59.201	62.001	60.601	61.601
SP20-C1	60.901	61.901	61.201	60.501	59.901	60.401	59.801	62.501	61.501	62.501	61.901	61.601	61.001	59.901	61.401	61.301	60.901	60.501	60.601	61.701	61.801	60.901	61.101	62.801	63.501	61.701	62.701	61.001	61.301	62.501	61.101	60.301	61.601	61.501	61.401	62.101	59.601	60.301	60.301	63.001	60.101	61.601	60.901	61.001	62.601	59.701	62.501	61.201	61.201
SP6-C1	62.301	61.601	61.501	61.901	62.301	61.801	63.101	64.301	62.401	61.701	62.201	62.401	61.301	59.501	61.701	61.401	62.501	61.201	62.201	60.601	61.201	62.101	63.601	62.701	63.601	61.301	62.401	62.801	62.001	63.401	63.301	61.001	61.101	61.001	60.001	62.001	60.701	61.101	61.801	63.401	61.701	63.801	63.201	61.201	60.301	59.801	61.501	62.001	62.801
SP7-C3	60.201	61.301	61.501	61.701	60.301	60.301	61.301	63.301	61.701	62.001	61.501	62.001	61.101	60.001	61.401	61.101	61.101	60.401	60.901	61.301	61.701	61.901	61.901	61.701	63.801	62.201	61.901	61.601	60.601	61.901	60.201	61.201	60.901	61.201	61.801	61.801	60.301	59.501	60.201	63.301	60.401	61.701	62.001	61.601	62.701	59.601	61.401	61.001	62.101
SP22-C3	60.401	60.501	60.901	61.101	60.901	60.301	60.801	63.401	62.001	62.401	63.001	61.501	61.401	59.401	61.401	61.001	61.001	60.201	61.601	62.701	62.901	62.801	62.101	63.001	63.301	61.901	62.001	61.301	60.701	62.701	60.001	60.001	60.001	60.601	60.701	61.601	60.101	59.801	60.801	62.401	61.401	60.601	61.901	60.201	62.301	59.601	62.301	61.601	61.501
SP33-C2	60.001	61.001	60.801	61.601	60.701	60.701	61.301	63.301	61.901	62.001	62.101	62.001	61.701	60.001	61.101	61.201	60.601	60.401	60.601	62.601	63.401	63.501	62.101	62.301	64.401	62.001	61.001	61.501	60.601	63.301	60.401	60.501	60.401	60.401	60.801	62.301	59.501	59.601	60.801	62.301	62.101	61.101	61.801	61.001	62.201	58.601	61.901	60.701	61.501
SP54-C1	60.301	60.701	60.401	61.401	60.601	60.501	61.501	63.101	62.201	61.801	62.301	61.801	61.301	59.301	61.101	61.301	61.101	60.301	60.801	63.701	63.401	62.301	61.801	62.101	64.301	61.901	61.501	61.401	61.201	62.801	59.901	60.301	60.201	60.601	60.701	61.401	60.001	60.101	61.301	62.501	61.601	60.401	62.001	60.801	62.201	59.401	61.901	60.801	61.401
SP40-C2	60.201	59.901	60.801	60.501	60.001	60.301	60.301	63.101	62.201	62.401	63.201	62.601	61.301	58.601	61.201	61.201	60.701	60.201	61.001	63.501	63.301	62.901	62.701	62.101	64.501	62.101	61.501	62.001	61.301	63.201	60.701	60.601	60.601	61.701	61.001	61.701	60.001	59.301	61.501	62.701	61.501	60.501	61.701	61.101	62.101	59.901	62.301	61.001	61.901
SP49-C3	60.001	60.701	60.801	60.701	60.801	60.201	61.101	63.001	62.701	62.801	62.301	61.901	61.201	59.801	61.101	60.701	60.601	60.201	60.401	63.801	64.101	63.201	61.901	61.801	63.801	61.801	61.401	61.101	61.101	62.901	60.401	60.301	60.801	61.201	61.301	62.201	60.501	59.701	60.801	63.001	61.401	61.101	61.801	60.301	62.301	59.901	61.701	60.801	61.701
SP13-C4	60.701	60.801	60.901	61.601	59.401	60.301	61.201	62.401	62.401	62.001	62.601	61.101	61.401	59.701	61.001	60.701	61.101	60.101	61.601	62.301	63.001	62.401	61.501	62.601	63.101	61.601	61.701	60.801	59.801	62.401	61.601	62.401	60.901	60.201	60.001	61.201	60.301	60.601	60.801	62.001	61.601	61.101	62.501	60.101	62.201	59.001	61.201	60.901	61.801
SP18-C3	61.101	61.501	61.001	62.301	61.001	59.801	61.001	63.501	63.501	64.001	63.601	62.101	61.801	61.101	61.101	61.701	61.401	61.901	63.201	63.801	63.801	63.201	61.401	57.501	64.701	64.601	62.201	62.201	62.601	62.801	61.301	62.801	61.701	62.201	61.301	62.801	62.001	61.501	62.101	62.901	65.201	61.401	63.801	63.301	62.301	59.901	63.501	62.901	63.301
SP35-C1	61.101	60.401	60.701	61.601	60.101	60.901	61.101	62.101	63.301	63.901	62.801	62.501	62.001	59.901	60.301	60.401	60.101	59.201	60.901	62.301	61.801	61.501	61.701	62.501	62.701	62.801	61.701	61.701	60.801	62.501	60.201	60.901	62.101	61.701	61.901	61.301	60.001	61.001	60.901	62.101	60.301	60.101	63.001	61.001	62.101	60.101	61.701	63.501	61.601
TTV24-SAa01	60.201	61.901	62.101	60.801	61.901	61.301	62.701	62.501	61.601	61.301	61.601	61.601	61.601	60.601	62.101	61.901	60.201	62.301	61.901	61.001	61.001	61.101	60.501	62.001	62.001	62.401	62.901	63.201	60.401	60.501	61.101	59.701	61.301	61.501	61.001	60.501	61.401	59.801	60.601	62.201	61.001	62.601	62.001	60.401	61.401	59.301	61.501	61.901	62.101
SP21-C1	60.801	62.501	62.601	62.301	61.401	61.201	60.201	62.001	61.901	62.001	62.201	62.801	62.301	61.901	61.501	61.001	61.501	60.901	60.701	60.501	60.701	60.701	60.801	61.801	64.301	62.001	62.301	60.701	60.301	62.601	61.001	61.601	62.101	62.601	62.701	63.101	60.601	60.301	60.201	62.301	61.001	60.501	62.501	62.901	60.401	61.101	62.401	62.801	61.301
SP27-C7	61.601	62.001	62.301	61.501	61.301	61.001	60.801	61.301	63.201	63.601	62.501	61.701	61.001	61.901	62.601	61.501	61.301	61.801	61.101	61.101	61.801	61.701	61.201	61.701	63.901	62.601	62.701	60.901	60.301	61.801	60.801	61.301	62.401	62.701	63.501	63.601	60.701	60.001	60.301	63.301	61.601	60.901	62.001	63.201	60.201	61.801	61.601	61.901	61.701
SP48-C2	61.401	61.001	61.901	61.601	60.701	60.701	60.601	62.301	61.901	62.101	62.501	61.301	61.201	60.301	62.101	61.701	60.801	60.501	59.801	60.101	59.501	60.901	61.001	62.001	64.101	61.901	62.001	61.001	60.501	61.601	60.401	60.901	63.001	62.101	62.701	62.701	61.001	60.901	60.301	62.801	62.301	60.601	61.601	63.001	60.401	60.901	62.201	61.901	61.401
SP37-C1	59.301	59.001	60.001	60.501	58.901	58.401	59.601	62.501	60.801	61.101	61.501	61.101	60.701	60.501	60.501	60.001	60.501	59.501	60.701	60.101	60.001	59.401	58.201	61.201	60.301	60.201	58.901	60.201	59.401	60.201	61.401	61.201	59.901	60.301	59.401	59.201	58.501	58.401	60.101	59.701	59.201	59.301	60.301	59.401	60.201	60.101	61.401	62.301	60.201
SP1-C7	61.601	62.301	63.301	60.301	61.601	62.901	63.101	63.401	63.801	62.301	62.501	62.801	63.301	60.701	61.501	61.901	61.301	62.201	63.401	63.601	62.701	62.101	61.701	61.201	63.001	61.601	62.401	61.701	62.301	61.501	63.001	60.801	61.101	61.001	61.601	62.701	61.301	60.401	62.101	62.301	61.301	63.101	59.901	60.701	62.101	61.801	61.301	62.501	61.601
SP2-C4	60.101	59.701	61.601	60.401	59.901	61.101	60.401	60.401	61.501	61.601	61.901	61.301	62.301	61.101	60.901	61.301	60.601	61.901	61.301	63.201	62.701	62.901	62.001	61.101	62.001	61.001	63.201	61.801	62.101	61.201	60.901	59.801	61.101	61.901	61.501	61.801	61.101	58.701	59.901	61.001	60.701	61.201	61.001	62.001	60.801	62.201	61.701	61.401	61.801
SP1-C8	59.701	60.801	60.501	58.401	62.201	61.101	61.601	60.901	60.801	60.901	60.701	60.101	60.601	60.601	61.201	61.401	60.901	63.601	62.201	61.001	61.101	61.301	62.201	61.501	61.401	60.601	63.501	61.301	60.401	60.601	63.001	60.701	60.901	60.801	61.201	61.201	60.701	62.801	61.101	63.201	60.701	62.101	60.801	61.601	61.201	61.901	59.201	61.601	61.701
SP6-C6	60.501	60.201	59.601	59.601	59.501	60.701	60.201	61.201	59.801	59.801	60.301	59.201	61.801	60.001	58.301	58.501	59.901	61.801	59.601	60.601	60.901	60.601	60.101	61.801	60.701	61.101	62.801	61.901	61.301	60.001	60.501	60.501	61.201	60.701	61.101	61.801	61.301	60.701	60.001	63.301	62.301	61.601	61.301	62.501	60.001	61.301	60.401	62.801	61.601
SP3-C8	60.701	60.301	59.801	59.501	60.101	60.401	59.401	61.001	59.701	60.001	59.901	60.201	62.901	59.901	59.501	59.701	61.001	60.701	61.201	61.701	61.601	62.001	60.601	61.301	60.401	60.801	62.501	62.601	62.001	60.001	60.101	59.901	61.201	61.001	61.301	61.101	62.201	60.401	60.001	62.201	61.401	60.501	61.001	62.601	60.301	61.001	61.001	63.001	61.501
SP33-C7	60.101	59.901	59.801	58.701	60.401	60.801	59.301	60.601	60.101	60.701	59.901	59.801	62.401	60.001	58.101	59.301	60.101	61.501	60.501	60.401	60.901	61.001	59.701	63.201	61.401	60.801	63.501	62.101	60.901	59.301	60.401	59.601	62.501	60.301	61.201	61.801	61.401	60.101	61.101	62.201	61.401	61.601	61.801	61.801	60.101	61.401	61.901	62.401	61.001
SP27-C3	59.901	59.501	60.101	59.201	58.801	59.701	59.801	60.801	59.701	59.301	59.801	60.301	59.701	60.301	60.801	60.801	60.401	59.401	61.301	61.901	62.101	61.301	60.401	60.601	61.201	61.201	63.901	61.101	60.201	62.801	61.101	59.701	60.801	61.301	60.401	60.301	60.401	60.601	60.801	61.601	61.001	59.401	61.801	61.801	61.801	61.301	62.101	62.201	62.801
P2-c10	59.701	59.401	59.801	59.501	58.801	58.601	61.801	60.601	60.601	59.501	59.801	59.101	60.101	58.501	56.801	57.501	57.601	60.201	58.301	60.801	60.501	60.601	59.401	60.901	60.701	61.401	58.901	60.201	60.301	60.501	60.101	56.901	59.101	59.501	59.101	58.201	58.401	57.401	59.701	59.001	60.201	60.601	60.001	60.201	60.101	60.401	59.901	61.401	58.501
SP3-C10	60.801	61.601	61.901	61.901	60.701	60.801	61.401	60.701	61.101	62.101	62.301	61.901	61.801	60.801	59.701	59.701	59.101	60.201	60.901	61.701	61.301	60.901	61.501	62.501	60.101	60.301	62.001	60.101	60.401	60.701	60.901	61.601	60.501	60.201	60.801	60.301	63.301	61.501	61.201	61.301	60.601	60.701	60.301	60.801	60.601	61.801	62.401	60.401	62.401
SP30-C1	61.301	59.901	61.101	61.401	60.601	60.801	61.301	60.801	59.801	59.501	61.101	60.601	60.101	60.301	59.301	59.101	57.501	60.001	62.001	61.801	63.301	61.401	59.701	62.201	59.501	60.601	61.801	60.001	58.601	60.401	61.401	59.701	60.701	60.901	61.201	60.701	61.201	59.801	60.801	61.901	61.201	61.201	61.101	59.601	62.901	59.901	62.401	60.901	61.901
SP47-C6	61.201	61.001	61.801	60.601	60.401	60.701	61.401	61.101	59.801	60.701	61.001	60.901	60.901	59.101	59.501	59.401	59.401	59.401	61.201	61.501	62.801	61.201	60.201	63.601	58.901	61.301	61.801	57.901	58.701	61.501	61.101	60.901	60.401	60.701	61.401	60.401	63.001	60.201	61.801	62.301	62.101	61.801	59.901	59.901	61.401	61.301	62.001	61.001	61.001
SP2-C3	61.301	60.701	60.301	61.601	59.801	60.601	60.101	62.601	61.801	61.401	62.301	62.701	62.501	60.201	62.101	62.401	61.301	61.401	61.101	62.001	61.201	62.901	62.001	63.401	63.001	61.601	63.001	60.301	60.801	63.701	61.301	62.101	59.701	59.601	59.801	59.801	59.901	61.201	62.101	62.801	61.901	62.501	61.101	61.901	61.401	62.201	61.601	62.001	60.801
SP18-C2	60.701	60.201	59.901	60.601	59.601	60.301	59.501	61.801	61.901	61.201	62.301	62.401	62.201	60.201	61.901	61.901	61.401	61.501	60.301	61.901	61.201	62.901	61.801	63.801	62.701	61.401	62.201	60.001	60.001	63.601	61.001	62.201	59.901	59.701	59.901	59.601	60.301	61.801	61.001	62.801	62.101	62.501	60.901	61.701	62.601	62.701	61.901	61.301	60.001
SP16-C2	60.001	61.501	61.601	61.001	60.201	60.601	61.401	61.201	60.501	60.501	61.501	62.001	62.901	60.801	60.801	61.201	60.601	60.801	60.201	60.601	60.001	61.501	61.701	61.601	61.401	60.301	61.901	59.301	60.101	62.201	60.701	63.501	61.301	60.701	60.701	60.401	60.901	61.801	60.701	61.901	62.601	60.001	61.301	61.701	62.101	61.201	64.201	61.501	61.001
SP33-C4	59.701	60.901	60.301	59.001	60.101	59.301	59.801	61.701	63.001	63.501	62.901	61.501	61.601	61.301	61.601	61.001	60.101	61.801	60.901	60.701	62.001	61.301	62.501	62.101	61.801	58.701	61.701	60.201	60.901	60.901	61.301	60.401	59.101	60.101	59.101	59.201	61.501	61.101	60.501	60.201	62.101	61.301	59.401	61.901	61.101	60.801	63.001	60.601	62.701
TTV21-TCHNB	59.701	59.001	59.301	59.301	59.801	59.401	59.301	60.501	61.201	60.301	60.201	60.401	60.701	59.901	59.701	60.601	61.801	61.101	60.701	59.801	60.101	60.401	59.401	61.401	60.801	59.801	60.901	61.001	61.001	60.901	59.801	62.601	61.401	60.501	60.901	60.201	60.101	62.201	61.401	61.801	62.301	61.201	62.101	61.401	61.401	61.101	61.001	61.701	61.001
SP2-C5	61.701	62.801	62.901	62.401	63.101	62.801	63.101	63.101	63.501	63.001	63.501	62.401	64.201	63.001	60.701	61.601	61.101	61.901	61.001	61.001	61.001	62.601	61.401	61.601	62.501	62.601	61.801	60.901	59.801	62.701	61.801	60.101	60.801	60.701	61.201	61.401	60.501	60.801	61.301	62.201	60.701	60.601	60.701	63.301	63.001	62.701	63.101	60.101	61.701
SP3-C7	61.901	62.901	63.901	63.201	63.401	63.601	63.801	63.201	62.901	62.701	62.701	62.601	63.701	63.101	60.901	60.401	61.201	61.801	60.601	61.501	61.701	63.301	60.901	61.801	62.001	61.101	62.101	61.801	61.001	62.401	62.301	61.001	60.401	60.001	61.101	60.401	61.601	60.101	62.001	61.901	60.201	62.001	60.501	64.101	62.701	62.401	62.801	61.301	60.901
SP3-C6	60.701	61.401	62.501	62.201	61.001	61.901	62.001	62.601	62.001	62.601	62.501	61.501	62.101	62.001	60.901	60.201	58.601	60.601	60.501	59.001	59.601	59.301	58.501	62.501	59.401	62.101	63.101	61.001	60.601	61.401	59.901	59.201	60.701	59.401	58.401	58.601	60.301	58.201	60.201	60.301	60.501	61.601	62.401	61.401	61.301	60.201	60.901	59.601	60.801
TTV19-SANBAN	63.501	63.201	63.801	63.201	63.001	63.501	62.601	62.801	62.101	62.401	62.601	60.801	61.301	62.301	59.801	59.601	59.501	58.901	62.401	60.601	60.901	60.801	60.201	61.201	60.101	61.901	60.101	59.001	58.701	60.401	61.401	61.301	61.401	60.501	61.701	62.301	60.201	60.701	61.501	61.201	60.601	60.601	61.101	61.101	62.901	61.001	61.901	61.901	60.701
SP3-C16	60.601	61.001	61.101	59.401	61.001	60.501	59.601	62.401	60.101	61.001	61.001	61.101	60.701	61.901	59.401	59.801	60.601	60.101	61.601	59.401	59.201	58.701	58.401	63.001	59.901	62.801	63.701	60.101	60.401	60.601	62.101	59.301	60.001	60.801	59.701	60.601	59.601	61.201	57.901	59.901	61.201	61.501	58.801	62.201	60.101	60.801	61.001	61.501	60.201
SP27-C5	61.801	60.601	61.001	60.401	61.101	60.901	60.401	62.101	60.201	60.201	59.801	60.001	60.101	60.901	59.901	60.001	60.401	61.301	61.501	60.101	59.301	58.501	57.901	62.801	60.201	62.901	62.801	59.601	59.901	60.901	60.901	59.101	60.101	59.801	60.101	60.401	59.501	60.301	58.001	60.201	60.301	61.501	58.701	61.201	58.601	60.801	58.801	60.901	60.701
SP22-C7	60.701	60.701	60.901	59.401	60.201	61.101	61.301	61.201	61.101	62.101	61.301	62.901	61.301	61.301	61.001	62.001	59.501	61.101	61.401	59.401	60.601	59.901	60.001	63.101	62.101	61.501	62.101	59.701	58.701	63.201	61.001	60.101	60.601	61.201	59.701	60.901	61.901	61.701	61.601	61.401	60.401	62.001	61.301	60.001	60.201	60.301	61.401	61.101	62.801
SP33-C3	60.201	60.101	60.401	59.501	59.601	61.601	61.301	61.501	60.701	61.201	60.201	59.901	60.901	61.201	62.101	61.401	60.701	59.801	59.501	59.701	59.901	59.501	60.901	60.801	61.001	61.401	62.401	60.501	60.801	60.901	60.601	61.301	61.101	59.901	60.401	59.601	59.501	62.801	63.201	61.801	60.801	61.301	61.701	61.901	63.201	61.001	61.001	61.501	60.601
SP42-C1	59.701	60.201	61.201	59.901	60.201	60.101	61.001	61.201	61.101	60.901	60.801	59.701	61.301	62.301	61.401	61.101	59.401	59.401	61.401	60.901	60.101	60.001	60.201	62.301	61.201	61.101	61.501	59.901	60.001	60.701	60.201	61.401	59.101	59.801	58.901	59.201	60.701	61.101	62.401	59.801	60.701	62.601	62.001	63.001	63.001	60.401	60.601	63.401	61.101
TTV20-SAa10	59.901	59.601	61.001	60.101	59.101	60.901	61.001	60.201	60.701	60.501	60.801	60.201	60.801	61.201	61.401	61.801	60.701	58.401	60.501	60.601	60.401	61.801	60.801	60.901	60.101	61.601	61.501	62.401	60.901	61.301	58.901	62.301	60.501	60.201	59.901	60.901	60.001	60.701	60.301	60.501	61.301	60.901	61.201	62.201	62.201	61.101	61.001	61.701	61.201
SP51-C4	59.801	60.401	59.101	60.201	60.401	60.001	59.701	60.501	60.701	61.801	60.301	60.901	61.301	60.601	60.301	61.001	61.401	60.901	61.001	60.301	60.501	61.001	59.501	60.501	60.301	61.001	61.001	61.301	60.701	64.001	62.201	62.401	60.101	60.101	60.001	61.201	62.801	61.601	61.601	62.501	61.301	61.801	61.901	62.401	62.901	62.401	63.501	62.401	60.601
SP41-C3	62.101	62.201	62.901	60.301	62.601	62.401	62.501	62.601	61.101	62.001	62.501	60.001	61.301	59.301	59.501	59.601	59.101	60.401	61.401	60.701	61.201	60.001	61.101	61.201	60.601	61.601	61.401	58.501	58.301	63.901	62.101	61.601	59.501	60.401	59.901	59.801	60.201	59.501	61.801	61.301	60.001	60.601	61.101	62.101	62.101	61.501	61.901	62.601	61.201
SP43-C7	60.801	62.001	62.101	60.301	61.001	61.701	61.501	62.301	60.601	60.501	60.701	61.701	61.401	60.801	60.101	59.801	59.901	61.201	61.201	60.201	60.101	60.901	60.701	62.801	58.701	61.701	61.501	60.701	60.001	64.101	60.601	61.101	61.101	60.601	60.101	60.801	61.001	60.601	60.401	60.501	59.801	60.401	61.501	60.601	63.601	60.001	59.701	60.601	61.301
P9-c4	62.101	61.901	62.501	63.201	63.601	62.401	61.501	62.401	62.301	62.601	62.401	61.001	60.701	62.401	62.001	61.601	61.701	61.301	62.001	60.601	61.501	61.201	60.001	61.701	60.901	61.701	62.001	62.001	60.401	64.001	62.601	61.201	63.001	61.701	61.301	61.401	61.601	60.701	61.001	60.601	60.701	61.601	61.701	63.501	61.301	61.001	62.001	60.401	62.601
P3-c6	60.101	61.101	59.601	61.401	60.601	61.301	60.301	61.701	62.101	61.601	61.101	62.701	62.201	61.501	61.901	61.901	59.701	60.901	61.801	59.901	61.101	62.101	60.801	61.201	60.601	61.401	62.601	61.601	61.101	61.901	63.201	62.801	61.301	61.201	61.301	62.501	60.801	61.701	60.601	60.401	60.201	61.001	63.201	60.601	62.901	60.001	60.801	62.901	61.101
SP3-C3	60.901	62.401	61.401	59.201	61.201	62.901	61.301	62.401	62.401	62.101	61.901	61.101	61.701	60.901	60.601	60.401	59.301	59.601	63.001	61.401	62.101	60.501	60.101	61.701	61.701	63.601	60.001	62.201	59.901	61.501	60.001	60.001	61.001	60.401	60.401	60.701	61.901	59.801	60.001	62.501	60.001	60.301	60.001	61.401	61.701	60.401	61.801	63.301	61.201
SP47-C13	61.101	61.601	62.601	59.801	61.201	62.601	61.201	63.201	61.301	61.701	60.901	60.401	61.601	60.801	61.801	61.601	59.201	61.701	62.101	61.801	63.001	61.201	61.001	60.101	61.801	63.301	61.301	62.501	60.401	62.601	62.201	60.701	61.901	62.501	61.401	61.601	60.501	60.301	59.801	62.301	60.001	60.401	61.301	61.501	61.101	62.601	62.901	63.201	60.401
SP37-C3	62.101	63.201	62.701	60.601	61.901	62.201	61.501	63.201	61.501	61.401	61.301	60.701	61.001	61.401	59.901	59.501	59.501	61.401	63.501	61.301	61.701	60.401	60.601	61.101	61.601	62.701	60.501	62.201	59.901	62.801	61.301	60.201	61.501	61.901	62.401	62.101	60.301	60.101	60.801	62.401	60.501	60.001	60.501	62.301	61.301	61.901	62.701	63.701	60.801
SP38-C4	60.401	62.401	62.001	60.501	62.701	62.701	62.101	63.701	62.501	62.601	61.801	62.401	64.801	63.201	59.101	59.201	61.401	63.701	63.301	60.601	62.101	60.701	61.101	61.001	62.801	63.401	62.101	63.301	61.101	62.501	62.301	61.301	61.801	62.801	62.001	62.801	62.101	60.501	62.701	61.701	61.201	59.501	60.701	63.701	61.601	62.601	62.601	61.701	59.501
SP46-C1	59.901	61.001	61.501	58.801	61.101	60.901	60.701	62.801	62.401	62.501	61.801	61.201	62.001	61.501	60.901	61.701	61.001	62.001	61.801	60.801	61.801	61.401	61.101	60.501	61.801	63.201	61.601	62.001	59.301	61.401	61.501	59.801	61.901	61.901	61.901	61.401	61.401	60.201	60.601	61.501	59.801	60.801	61.101	62.101	62.301	61.501	62.501	62.501	60.301
SP45-C4	60.601	61.301	62.101	60.501	61.301	61.201	61.101	62.601	61.401	61.301	61.201	60.201	61.901	61.601	61.001	60.801	60.001	62.701	62.201	61.501	62.201	61.501	60.801	59.701	63.801	62.801	61.001	63.001	61.101	62.501	61.901	60.201	60.601	61.801	60.401	61.001	62.301	61.701	60.601	61.001	61.501	60.201	61.401	62.301	61.801	61.901	63.401	62.501	60.501
SP59-C1	61.501	61.301	61.901	61.101	61.401	61.301	61.601	62.401	61.301	61.201	61.201	59.601	61.101	61.501	61.201	61.401	60.701	62.201	62.501	61.801	62.201	61.201	62.201	59.701	62.701	62.801	61.001	62.301	60.501	62.601	60.901	60.501	61.001	61.801	60.901	61.201	62.201	60.401	60.101	61.701	60.901	59.701	61.301	62.101	61.801	61.901	62.501	62.501	60.701
SP15-C3	60.501	61.801	61.901	59.601	61.701	62.101	62.701	62.801	60.901	61.101	61.001	60.701	61.801	61.401	61.101	61.601	61.601	60.601	60.201	60.801	61.801	60.601	60.101	62.301	62.101	61.801	61.701	61.901	60.701	62.701	61.001	60.601	59.901	60.301	59.101	59.601	59.301	61.001	60.401	61.201	59.901	60.101	61.701	60.201	61.201	60.001	61.601	61.101	61.601
SP3-C12	61.201	62.201	61.801	60.801	62.201	63.201	62.001	62.801	63.201	62.501	62.901	63.001	63.801	62.501	61.901	61.601	64.001	62.501	63.201	62.001	62.801	62.901	63.501	62.401	61.901	60.901	61.901	61.301	61.001	62.201	62.201	60.501	61.401	61.901	60.201	59.401	61.301	60.601	61.701	61.301	61.101	62.201	60.701	62.701	61.401	60.101	61.801	61.801	61.301
SP45-C2	60.901	62.701	61.001	60.901	62.001	62.301	62.501	63.101	63.301	62.701	63.301	62.301	63.401	62.101	61.101	62.701	63.001	63.801	63.801	61.101	61.601	63.401	62.801	60.401	61.101	62.801	61.801	60.701	61.501	62.101	62.301	59.801	60.601	60.801	59.501	59.901	60.101	61.201	62.101	61.701	61.701	62.001	61.301	62.301	61.301	60.301	61.101	62.001	60.201
SP23-C2	61.701	61.201	61.201	59.201	62.001	61.201	60.801	63.101	62.801	62.201	62.601	63.601	62.801	62.901	62.101	61.301	63.301	62.401	63.901	63.701	64.601	63.401	61.901	61.501	62.501	63.001	61.601	62.201	61.401	62.101	60.901	61.001	60.201	61.001	61.001	60.101	60.801	60.701	62.501	62.101	62.601	60.601	60.601	62.101	62.101	60.501	62.201	60.801	60.001
SP16-C18	61.701	61.201	61.301	58.801	60.701	61.501	60.601	63.501	62.301	62.001	63.101	62.501	63.001	63.301	60.701	59.901	61.601	61.001	62.301	62.301	62.701	62.201	61.901	61.301	62.201	62.701	62.001	62.901	61.901	63.201	62.701	60.201	60.901	60.301	58.801	59.301	59.501	61.801	60.501	61.301	59.601	61.701	59.801	60.701	62.501	59.901	60.801	60.801	60.501
SP15-C1	62.301	62.601	62.001	59.801	61.701	61.601	62.001	62.501	63.101	62.701	62.901	62.201	62.701	62.101	60.201	60.901	62.201	61.601	63.101	62.301	62.601	63.801	61.901	61.301	61.301	62.401	61.801	61.501	61.301	61.901	61.001	59.901	59.901	59.501	59.201	59.301	61.001	59.801	61.401	61.801	61.301	60.801	60.601	63.801	61.401	61.301	62.201	61.501	60.101
SP27-C6	62.701	62.301	62.501	60.301	61.201	62.001	62.001	61.701	62.901	62.201	62.701	62.701	62.701	63.201	61.301	61.101	62.801	62.101	62.901	62.401	62.901	62.801	62.801	62.201	61.901	63.201	61.701	62.401	61.801	62.501	62.101	60.801	60.601	60.301	59.201	60.501	61.301	60.701	61.401	61.101	60.801	61.601	60.601	62.001	61.401	60.301	61.901	61.601	61.001
SP26-C1	62.501	62.101	62.001	59.801	61.601	62.201	61.901	61.501	63.501	63.501	63.701	63.201	62.301	62.601	61.301	61.801	62.301	61.301	62.601	63.101	63.101	62.801	62.501	59.601	62.301	62.901	62.001	61.501	61.101	62.901	61.201	60.701	58.801	59.801	59.301	59.601	61.801	60.401	61.601	61.201	61.201	60.801	60.501	63.501	62.201	60.401	61.801	61.801	60.601
SP14-C1	62.401	61.901	63.401	62.501	63.301	64.001	63.201	62.601	63.301	63.101	63.701	62.601	63.301	62.501	61.701	63.001	63.501	62.801	62.201	63.201	63.501	63.401	60.901	61.601	62.501	61.901	61.301	61.201	62.501	62.201	62.701	61.201	60.201	59.501	59.001	59.501	61.501	61.901	60.401	62.201	60.601	60.601	60.101	61.401	62.201	59.101	62.201	61.101	60.601
SP22-C1	63.001	62.501	62.801	61.401	61.901	63.101	62.201	62.501	62.801	62.201	62.801	63.501	62.801	61.501	61.501	62.101	63.001	62.401	62.501	62.801	63.001	63.801	60.901	60.901	60.901	62.401	62.001	61.701	62.501	61.901	62.401	60.501	59.301	58.901	59.101	59.401	61.301	59.401	59.801	61.901	60.701	60.501	60.501	61.001	62.001	59.001	62.001	61.001	61.001
SP49-C4	61.401	61.701	63.701	61.601	62.301	63.001	63.001	61.601	62.101	62.601	62.601	62.901	62.701	61.601	61.601	61.901	62.501	62.901	61.901	61.901	63.001	62.701	60.801	61.801	61.001	62.101	61.401	61.101	62.301	62.001	61.701	61.801	59.801	59.601	59.001	59.701	62.101	61.401	60.101	62.301	59.601	60.401	60.401	61.401	62.101	59.401	61.301	61.701	61.001
SP28-C2	65.001	63.401	63.601	62.201	63.901	63.601	63.401	62.001	63.101	63.501	63.701	63.501	63.001	61.001	62.301	63.901	63.801	62.601	64.901	63.801	62.401	63.201	62.301	57.601	63.901	62.701	64.101	63.001	61.801	62.001	61.801	61.801	61.301	60.801	60.501	61.401	62.901	61.301	62.301	61.901	63.401	60.701	63.001	62.001	62.601	62.901	63.401	62.901	62.301
SP3-C13	61.901	61.901	61.601	62.201	62.801	61.401	63.001	62.601	63.501	64.301	63.801	62.501	63.001	63.101	60.501	60.801	60.601	62.601	62.201	63.201	62.901	62.601	62.201	62.701	60.601	62.001	63.401	62.101	61.401	61.601	61.801	61.001	61.001	60.801	60.701	60.801	61.301	62.101	62.801	61.401	61.401	60.901	62.601	62.601	62.201	63.101	62.701	62.401	61.501
TTV18-SENVC	61.201	61.901	61.901	61.401	61.601	62.301	61.801	63.601	62.301	62.701	62.001	60.801	63.001	62.001	61.201	61.501	60.901	60.001	61.401	62.601	61.801	62.601	60.801	62.001	63.301	61.201	62.601	60.201	60.101	59.201	61.801	59.601	60.701	61.701	62.101	62.101	60.701	60.401	61.001	62.101	60.501	61.301	61.301	63.701	60.001	60.801	61.801	61.301	59.801
SP3-C5	61.401	62.501	62.201	61.401	62.101	61.901	62.501	61.001	62.701	61.601	62.001	62.601	63.301	60.401	60.401	61.201	60.001	60.401	61.901	61.901	62.101	62.301	62.201	65.801	62.001	62.501	61.401	62.601	61.701	61.901	63.001	61.001	59.501	60.501	61.401	60.201	61.801	60.401	61.701	61.101	60.201	61.101	62.501	61.501	60.801	60.301	61.601	60.701	62.801
SP16-C8	61.301	61.901	62.701	62.301	61.601	62.201	62.001	60.901	63.601	62.301	62.601	62.301	62.701	60.501	61.501	61.501	60.401	60.701	62.301	61.801	61.901	62.801	62.401	65.301	62.701	61.801	60.801	62.701	62.101	61.801	62.701	60.801	61.501	59.601	60.401	60.601	61.301	60.701	61.601	60.401	60.401	60.701	62.901	61.001	60.401	60.501	62.001	59.901	62.701
SP23-C1	61.401	62.001	62.101	61.901	62.001	61.401	62.301	60.401	63.101	63.001	62.701	62.601	62.401	60.701	61.501	61.301	60.601	60.401	61.201	62.001	62.801	61.901	61.501	64.701	62.401	61.801	61.801	62.801	61.801	61.701	62.801	59.901	59.901	60.901	60.501	59.801	61.401	61.401	61.801	60.801	61.501	61.001	62.001	60.801	60.301	60.101	61.501	60.301	63.101
SP39-C1	61.301	61.801	62.501	62.501	61.801	61.901	62.701	60.901	62.801	62.601	62.801	62.001	62.701	60.801	60.701	61.001	60.701	60.201	61.001	61.701	62.101	61.901	61.601	64.501	61.801	62.101	61.801	62.201	61.701	61.401	62.901	60.101	60.001	59.901	60.901	59.201	61.701	60.801	62.001	61.901	61.201	61.101	62.501	61.701	60.401	60.501	60.801	60.701	63.401
SP43-C1	61.501	62.301	62.101	62.301	62.001	61.601	62.701	61.401	62.601	62.601	62.901	61.901	63.001	61.201	61.401	61.401	60.701	60.101	61.301	62.001	62.001	61.601	62.101	64.801	62.401	61.401	61.801	62.801	62.201	61.601	62.701	60.001	60.101	60.101	60.701	58.701	61.401	60.801	61.901	60.601	61.001	61.101	62.901	62.101	60.501	60.501	61.301	60.301	62.501
SP25-C1	61.501	61.301	62.601	62.601	62.201	61.501	61.301	60.801	63.201	61.901	62.501	63.401	62.601	60.501	61.101	61.301	61.001	60.101	61.101	61.901	62.001	62.101	62.601	64.601	62.101	62.101	61.301	62.601	61.601	61.301	62.701	60.301	59.701	60.801	60.301	59.301	61.101	60.401	61.701	61.101	61.101	60.201	62.901	61.101	60.001	60.601	61.901	60.001	62.801
SP7-C1	60.701	61.001	61.401	61.401	61.501	62.001	62.401	60.601	62.801	62.301	62.701	62.301	62.801	60.901	60.701	61.001	59.601	60.701	61.001	61.401	62.501	61.901	62.501	64.701	62.501	61.401	61.801	62.501	62.401	61.901	62.901	60.701	60.701	59.901	59.901	59.101	60.801	59.801	62.101	61.401	60.201	61.701	62.901	61.001	61.101	59.801	61.301	60.601	62.801
SP28-C3	61.401	60.801	62.301	61.501	62.001	61.801	63.101	61.001	63.401	63.001	62.801	62.801	62.301	61.001	59.901	60.401	60.601	59.301	61.701	61.501	61.601	62.701	62.901	65.101	62.101	61.801	60.901	62.501	62.001	62.001	63.201	60.701	61.101	60.501	60.401	60.101	62.601	60.701	62.301	62.101	61.601	60.701	61.801	61.701	60.301	59.701	62.301	60.501	62.001
SP21-C2	62.101	61.501	62.101	63.501	62.101	62.401	62.001	60.301	62.001	62.201	62.001	62.001	63.001	60.701	61.001	60.801	60.401	61.001	62.301	62.301	63.001	62.901	63.101	65.101	62.201	62.401	62.001	60.301	61.601	62.101	63.001	61.801	60.301	59.801	59.801	59.401	62.401	60.901	62.301	61.801	61.301	61.701	60.601	61.001	61.201	60.801	60.601	60.501	62.001
SP52-C2	60.701	62.501	61.801	62.401	61.401	61.801	61.601	61.601	62.701	62.301	62.501	62.401	62.201	60.701	61.901	61.101	59.601	59.801	61.601	62.501	62.501	62.401	63.001	65.401	62.101	61.601	61.401	62.001	61.601	62.401	63.001	61.401	61.101	60.501	60.201	60.001	62.201	61.401	61.501	61.201	61.401	60.801	62.501	62.001	61.201	61.301	62.501	61.401	61.801
SP47-C2	61.701	62.501	62.001	60.201	62.201	63.001	62.501	61.401	62.901	62.101	61.801	62.101	62.901	62.001	60.901	60.901	60.401	62.801	61.401	61.801	62.101	62.101	62.801	62.701	61.801	61.301	61.701	60.801	61.201	61.901	61.001	60.401	61.201	60.601	60.901	61.201	59.801	60.901	61.901	62.501	60.201	61.801	60.601	62.401	60.001	58.901	60.301	61.001	61.401
SP13-C3	60.701	60.401	60.101	60.601	60.501	61.501	60.301	61.701	64.401	64.301	64.301	63.901	64.001	62.201	61.701	61.401	60.801	61.601	62.501	62.401	62.301	62.501	61.901	63.501	61.401	63.601	62.301	61.601	60.101	61.601	60.701	60.501	61.601	61.001	61.001	60.901	60.301	61.401	61.001	63.001	60.001	61.201	60.301	63.201	62.001	59.901	61.301	62.401	61.401
SP56-C5	61.001	60.501	60.901	60.501	60.801	60.901	60.901	62.401	63.701	64.201	65.201	64.701	64.301	59.601	61.301	61.601	59.701	60.901	61.701	62.101	61.901	61.701	61.801	62.501	62.101	62.801	62.701	60.701	60.201	60.901	60.001	60.901	61.301	60.801	61.101	61.501	60.201	61.001	60.501	62.401	60.501	59.201	59.801	62.701	60.801	57.701	59.801	62.001	60.801
TTV15-TJN01	59.801	60.601	61.001	60.501	60.901	60.001	60.601	61.201	63.601	63.601	63.701	62.301	63.001	60.501	60.701	60.201	59.401	59.901	60.001	62.001	61.501	60.801	60.501	62.101	62.201	60.901	62.201	61.001	59.001	61.001	61.301	60.501	59.801	60.401	60.101	60.901	59.501	61.701	59.501	61.601	60.501	61.401	60.801	61.201	61.701	58.201	61.001	60.701	60.401
P1-c2	62.801	62.301	62.801	61.701	62.201	62.101	62.001	61.101	61.901	62.001	61.701	62.001	61.301	61.201	60.001	60.101	59.701	60.801	60.001	60.601	61.301	61.001	59.701	61.701	59.001	62.301	62.001	61.301	60.701	61.301	60.501	61.701	61.201	60.801	59.601	59.901	61.801	59.501	61.201	61.601	61.401	59.701	59.201	60.801	62.501	59.601	60.901	61.101	61.401
TTV17-SENVG	62.101	62.001	62.001	61.401	62.501	62.201	62.201	61.201	62.701	62.701	62.901	61.501	62.401	62.501	62.901	62.701	61.701	62.301	61.701	61.101	60.901	61.701	60.401	63.701	63.101	59.501	61.501	63.901	62.601	62.001	62.401	60.901	59.801	60.101	60.101	59.901	60.401	61.301	60.901	63.001	61.801	60.301	61.301	60.101	60.001	60.501	62.401	63.701	61.401
SP3-C2	62.601	63.301	62.901	63.401	62.801	63.501	63.401	60.801	61.101	60.901	61.601	60.901	61.101	61.801	60.701	60.601	59.901	61.201	61.601	60.601	62.701	62.001	61.901	60.701	60.701	61.801	60.601	61.801	62.001	60.301	59.201	58.301	60.701	60.201	60.001	60.501	60.701	58.301	59.501	60.501	58.601	60.001	61.701	59.001	60.701	59.601	58.901	60.901	60.401
SP27-C4	62.101	62.001	62.101	62.601	62.201	62.201	61.801	61.001	61.301	61.301	61.401	60.901	62.101	61.601	60.601	60.601	60.701	61.501	62.501	61.701	62.201	62.101	61.201	60.801	60.101	62.601	60.701	60.901	60.601	60.501	59.601	58.901	59.901	60.001	59.601	59.501	60.901	59.301	60.401	59.601	59.001	59.701	61.501	59.601	59.901	60.301	59.201	59.601	59.501
SP47-C7	62.001	62.101	62.501	62.401	62.101	62.301	61.601	61.001	61.001	61.201	61.101	61.501	61.701	62.101	61.001	61.201	60.401	61.501	62.201	61.901	62.701	61.801	60.501	61.901	60.601	63.101	61.301	62.001	60.801	60.701	59.701	58.501	60.001	59.801	59.501	59.601	60.101	59.101	59.801	60.101	59.101	59.101	60.801	59.101	59.501	60.001	59.201	60.101	60.401
SP32-C1	62.501	62.401	62.401	63.601	62.201	62.401	61.401	60.901	61.201	60.801	62.501	60.501	61.501	61.501	60.101	60.101	60.401	60.801	61.901	61.101	62.601	61.901	61.201	63.201	61.001	61.801	59.801	61.301	60.601	60.601	59.701	59.901	59.501	60.101	59.601	59.901	60.401	58.901	59.401	60.101	59.201	58.901	61.001	58.501	60.101	60.001	59.601	60.401	59.301
SP38-C1	61.901	62.201	61.401	62.101	62.101	63.001	61.401	61.401	61.601	60.801	61.901	60.801	61.901	60.701	60.301	59.601	59.401	61.301	61.401	61.001	62.401	61.901	61.601	60.901	60.301	61.801	61.301	61.001	60.301	60.401	59.401	59.001	58.901	59.301	58.201	58.401	60.801	59.901	60.501	59.501	58.401	59.301	61.301	60.101	60.201	59.801	59.401	60.301	60.101
SP51-C2	62.801	61.801	62.101	62.401	61.701	62.201	60.801	61.301	60.901	61.301	61.401	61.101	62.301	61.901	58.801	58.801	57.701	60.901	61.601	61.301	62.201	61.501	61.601	62.301	60.401	62.101	60.401	59.601	59.301	60.601	59.301	59.701	58.701	60.001	58.501	58.801	58.801	59.601	58.901	59.401	58.201	59.601	60.901	59.501	59.601	60.801	59.901	60.201	58.001
SP57-C1	63.101	62.401	63.001	63.701	62.801	63.701	62.401	60.901	63.201	62.301	63.001	61.901	62.201	62.401	60.901	60.701	59.201	61.501	60.901	62.001	62.101	61.901	61.801	60.601	60.501	62.001	60.501	60.701	59.901	62.101	60.501	59.801	60.901	61.601	60.101	60.401	60.101	59.101	60.001	60.701	58.601	58.601	61.601	60.501	59.701	59.001	59.701	60.501	58.701
SP27-C1	62.501	61.201	62.001	60.701	60.901	62.201	61.401	61.501	62.001	62.101	62.601	61.001	60.901	61.601	59.301	59.901	60.001	62.001	60.501	59.801	61.101	60.701	59.601	60.401	59.601	61.601	61.801	58.301	58.401	60.601	60.601	58.201	59.601	61.401	59.501	61.101	59.701	59.901	60.901	60.901	59.901	59.101	61.201	59.001	59.801	59.001	57.601	59.401	61.401
SP41-C1	62.801	61.301	61.901	60.601	61.301	61.801	61.701	61.501	62.201	62.001	62.301	61.301	61.101	61.501	60.301	60.301	59.601	62.401	60.701	60.401	61.301	60.901	59.601	60.001	59.601	61.801	61.301	57.701	57.701	60.601	60.301	58.901	59.601	60.701	59.801	61.101	59.201	59.301	61.201	60.501	59.001	59.301	61.001	59.701	59.101	58.901	57.601	59.701	61.401
SP38-C3	62.801	62.101	62.101	61.901	61.701	62.101	61.701	59.701	61.501	60.701	60.701	61.001	60.901	62.201	59.301	60.001	59.801	61.401	59.901	61.601	62.301	61.701	61.101	62.101	60.301	61.101	60.801	58.101	59.101	61.701	60.501	59.601	61.401	61.101	61.501	61.601	59.201	61.801	60.601	60.301	58.601	59.101	61.301	59.701	59.401	59.001	59.301	60.101	60.801
SP13-C1	61.701	61.901	62.501	62.201	60.501	62.301	63.001	62.101	61.901	61.501	61.301	60.801	60.101	61.201	60.101	60.601	59.501	62.501	62.401	60.201	60.601	60.801	59.201	61.901	60.901	61.201	62.501	59.401	58.601	61.401	60.901	60.401	61.001	60.901	60.501	61.001	61.901	59.601	60.101	60.501	60.001	59.801	61.501	61.401	59.101	59.001	59.001	60.001	60.101
SP37-C2	62.401	61.901	62.701	62.301	61.501	61.701	62.601	62.901	60.701	60.501	60.901	61.401	60.801	60.401	60.401	61.001	58.801	61.401	60.701	61.101	61.701	60.801	60.201	62.101	61.401	62.001	62.201	59.701	60.001	61.901	60.101	61.501	62.301	61.301	61.201	60.801	60.901	58.901	60.901	59.801	60.001	59.301	61.401	62.301	58.501	58.301	59.401	59.601	60.301
SP24-C5	61.001	61.701	62.001	61.601	61.701	61.601	62.901	61.201	61.201	61.701	61.501	61.001	61.201	61.201	59.801	59.901	57.901	60.801	60.601	61.401	61.701	60.401	60.701	62.501	60.801	61.001	61.601	59.101	59.701	61.201	61.201	59.201	60.801	60.401	60.101	60.601	61.301	59.001	60.401	59.201	59.201	59.101	61.401	60.801	59.701	58.901	58.101	59.901	58.401
SP39-C3	61.301	61.201	62.001	60.801	60.501	60.801	61.201	60.601	62.501	62.401	62.701	60.801	62.501	60.701	60.601	60.301	59.401	60.801	61.101	60.901	60.201	60.901	61.401	62.401	60.901	62.101	62.101	60.501	60.001	60.801	60.901	60.301	60.801	60.401	60.701	60.501	61.101	58.501	60.201	58.901	59.601	59.101	61.201	60.701	59.301	58.601	59.201	58.801	60.501
TTV13-TCHNA	61.401	60.801	60.701	60.901	60.801	60.601	61.601	61.101	63.001	62.401	61.901	60.501	63.501	61.601	60.201	59.701	59.501	61.601	61.401	59.301	60.701	60.001	60.901	60.101	62.201	62.101	60.601	60.001	59.401	62.001	61.401	59.101	61.301	61.001	61.101	61.401	61.201	59.301	60.301	59.001	58.001	59.801	59.501	60.801	59.201	57.801	57.601	58.401	60.101
SP33-C5	63.301	62.901	63.801	63.901	63.501	64.101	63.801	62.701	61.501	61.801	61.601	62.301	62.101	61.501	60.801	61.201	59.901	60.101	61.401	61.801	61.201	61.501	60.601	62.401	61.101	62.501	61.701	61.301	61.101	61.401	60.501	60.001	59.201	59.301	59.901	59.901	60.101	59.801	61.701	59.201	59.301	59.001	62.901	61.101	59.701	60.701	60.801	59.401	60.001
TTV14-CH651	61.101	60.701	61.701	61.401	60.801	62.401	60.801	62.201	61.801	61.801	61.501	61.101	60.901	60.601	60.701	60.401	60.701	60.701	59.801	64.401	63.501	63.301	63.201	63.001	61.401	62.201	62.101	60.201	60.001	59.901	60.301	60.701	59.501	59.001	59.501	59.501	58.301	59.401	58.701	59.101	60.301	60.301	60.401	58.301	61.601	59.701	59.601	60.901	59.901
SP2-C2	60.101	60.201	59.201	60.201	58.901	59.201	59.501	59.201	60.701	61.401	61.801	59.901	61.301	59.401	59.301	59.001	59.301	61.801	59.401	62.201	61.501	61.301	60.801	61.101	62.301	59.601	58.501	58.901	59.101	59.701	60.201	57.601	60.101	59.101	60.301	60.401	60.601	61.101	59.501	60.801	61.201	61.301	61.501	60.601	58.901	59.901	60.101	59.901	61.601
SP10-C1	59.701	60.401	59.201	59.001	59.601	58.901	59.401	59.101	60.601	60.701	61.501	59.601	60.501	58.901	58.801	59.001	59.701	61.001	61.501	60.601	60.801	60.801	60.201	60.701	60.501	59.401	58.901	58.801	59.601	59.701	59.501	57.101	59.301	60.301	60.601	59.601	60.701	61.801	59.201	61.101	61.001	59.901	62.001	59.501	59.201	60.501	60.101	59.801	62.301
SP33-C6	62.001	63.201	60.801	63.901	61.701	63.601	61.601	61.601	61.801	62.701	62.401	61.101	63.101	60.201	59.601	59.401	59.601	62.601	60.801	59.401	59.501	61.001	61.101	61.201	60.401	60.201	59.701	58.401	59.101	59.101	60.101	59.401	59.601	60.201	60.301	60.401	59.901	62.501	61.101	60.901	61.001	61.301	59.301	59.701	58.501	60.901	59.901	59.601	61.401
SP51-C3	61.201	61.601	61.001	61.301	60.801	61.601	61.601	61.201	61.301	61.701	61.201	59.901	61.601	61.501	58.501	58.301	59.801	58.901	58.601	60.701	60.801	60.501	59.601	61.301	59.401	62.601	60.701	60.201	59.501	59.001	58.701	57.401	60.101	59.801	60.701	60.101	59.401	60.801	60.001	60.001	61.501	59.801	61.301	59.501	59.901	59.801	60.901	60.901	58.201
SP51-C28	63.401	63.701	61.701	61.401	62.001	63.101	63.001	63.201	63.001	63.701	63.501	62.101	63.501	62.401	60.701	60.301	61.901	60.701	61.301	61.701	62.801	62.001	61.601	60.501	60.401	62.801	60.901	62.001	61.001	61.701	61.101	60.301	62.501	62.601	61.501	62.801	61.201	62.501	61.601	62.801	62.101	60.401	63.401	61.201	62.301	61.801	62.401	61.901	61.101
SP3-C18	60.201	60.401	60.601	61.101	60.901	60.801	60.601	60.401	60.501	60.101	60.001	62.301	61.501	59.501	58.301	57.701	58.401	60.901	59.601	60.301	60.801	62.401	60.501	61.301	60.501	60.201	60.201	59.101	60.301	59.201	61.601	60.401	60.901	60.501	60.001	60.701	61.101	60.701	60.801	60.901	59.301	59.601	60.101	58.801	59.701	60.001	62.701	61.001	62.401
SP7-C2	60.801	59.801	60.301	61.101	60.201	60.401	60.301	60.101	60.401	59.901	61.101	60.401	62.101	59.801	59.001	58.401	58.701	61.601	60.801	59.901	61.501	61.201	60.001	61.001	60.801	60.401	60.001	59.301	60.001	59.401	60.501	60.401	60.701	60.501	59.801	60.501	58.501	60.601	60.901	60.501	59.201	60.201	60.201	59.001	58.901	60.901	60.501	59.901	59.601
SP10-C2	59.301	60.001	59.801	60.401	60.601	59.901	59.901	59.801	59.901	59.901	59.901	60.301	61.601	61.701	58.601	59.101	58.601	60.801	60.301	61.401	60.901	60.301	59.501	60.601	61.401	62.701	59.301	58.901	59.601	60.501	59.501	59.801	61.901	61.401	61.301	61.801	60.301	61.401	61.301	60.901	59.601	59.301	61.201	58.001	59.701	59.801	60.901	61.501	61.601
SP24-C1	59.201	59.301	60.101	61.001	59.701	60.501	59.601	59.301	60.801	60.201	60.101	62.001	62.101	59.401	58.401	58.601	59.801	61.501	60.301	58.901	60.201	58.801	59.201	60.901	61.301	60.001	59.701	59.601	60.001	59.201	60.001	59.701	62.201	61.501	60.401	61.101	59.701	60.601	61.101	60.001	59.901	60.001	59.701	58.501	59.401	59.601	61.301	60.001	59.701
SP47-C11	60.301	60.001	60.801	61.801	60.901	62.501	61.101	60.501	60.301	59.601	60.101	60.401	61.701	60.501	59.301	58.901	58.901	61.101	60.201	60.401	59.401	59.801	58.901	59.801	62.901	62.201	61.501	59.601	60.001	60.001	59.601	59.901	62.201	61.101	60.901	60.701	59.401	62.001	60.901	59.501	59.301	59.801	60.601	57.101	60.301	59.601	62.301	59.801	61.401
SP33-C1	60.301	60.501	60.301	60.801	60.801	61.801	59.301	59.101	59.101	59.301	59.101	59.401	60.801	61.201	58.601	58.601	60.001	62.201	60.001	59.601	59.801	59.601	58.101	62.201	62.101	61.501	58.401	59.801	60.601	59.401	61.501	60.301	61.301	60.601	60.701	60.701	60.001	61.901	60.901	59.701	59.701	59.201	60.501	59.601	60.601	60.501	61.201	60.401	61.601
SP35-C9	59.001	59.401	58.901	60.001	59.501	60.601	59.101	59.501	60.201	60.501	61.201	60.701	61.701	59.901	59.501	59.401	60.001	60.801	60.501	61.101	62.801	61.401	59.201	60.801	61.801	60.401	60.801	59.401	60.401	59.301	60.201	59.801	61.701	61.001	59.701	61.201	61.001	59.901	62.201	60.301	59.401	59.101	59.801	59.701	58.901	60.801	61.301	61.301	59.801
SP39-C2	59.601	62.201	60.701	61.201	60.201	60.301	59.601	58.901	60.901	60.501	60.701	59.701	62.601	59.201	59.501	59.901	60.101	61.301	59.701	59.701	61.001	60.101	59.201	60.801	59.701	59.701	59.901	60.001	60.601	59.601	60.501	59.801	61.401	61.201	60.101	61.101	59.601	60.401	60.601	59.701	60.101	58.801	60.401	59.501	59.901	60.201	60.601	59.301	59.701
SP20-C4	60.701	60.801	60.001	60.901	61.301	61.501	61.301	59.201	60.801	61.601	61.101	60.701	61.901	60.801	60.401	59.901	61.701	60.301	60.101	61.801	61.801	61.101	60.101	60.701	61.401	61.101	59.401	57.901	60.101	59.401	60.901	59.701	60.801	61.601	61.701	61.501	60.801	62.101	62.501	61.201	59.501	61.101	62.101	60.101	60.901	59.501	59.901	61.701	61.401
TTV29-TTV-yon-KC009	61.401	61.101	60.701	61.001	61.101	61.501	60.801	60.001	59.701	59.401	60.801	59.101	60.701	60.101	60.301	59.301	60.901	61.001	60.701	60.801	61.501	59.901	59.701	60.901	61.301	60.601	59.101	60.301	59.101	59.301	59.501	59.501	59.401	58.701	60.101	59.801	60.001	59.701	61.101	60.901	60.901	59.801	62.701	59.001	59.401	57.901	60.001	59.001	59.801
SP51-C10	59.601	60.601	60.001	60.801	59.401	61.301	60.701	61.701	60.901	61.201	61.401	62.101	62.201	60.701	60.201	59.801	61.101	61.601	60.901	61.401	62.601	63.001	61.001	62.601	60.901	62.201	59.901	58.501	58.501	58.501	60.401	60.901	62.301	61.301	61.801	61.401	62.001	60.701	62.401	62.601	59.301	61.501	61.101	61.301	60.301	60.601	62.101	59.701	59.201
SP12-C1	60.501	60.101	59.401	59.101	60.401	60.101	61.101	61.301	61.001	60.301	61.701	61.201	63.301	60.401	61.001	60.701	62.201	60.001	61.601	61.801	61.901	63.501	62.001	61.501	61.301	61.901	60.401	60.901	60.601	60.301	61.701	59.801	62.301	61.301	61.101	61.501	62.201	60.101	62.801	62.001	60.301	62.201	61.801	61.001	60.801	60.001	62.301	61.301	59.501
SP51-C5	60.601	60.801	60.801	60.001	59.801	59.901	60.301	60.901	60.601	59.801	61.201	60.801	63.701	60.501	59.801	59.801	61.301	58.801	61.501	60.701	62.301	64.001	62.201	61.101	60.901	61.601	60.101	59.901	60.501	60.401	62.301	59.901	61.001	60.501	60.701	61.101	61.501	60.401	61.801	61.901	60.101	61.701	62.001	60.701	60.501	59.701	61.301	61.001	59.901
SP47-C12	60.701	60.501	59.901	59.201	58.501	61.101	61.901	62.001	60.401	62.901	60.901	59.801	63.101	61.101	61.301	60.401	60.401	60.101	61.001	61.201	61.701	62.301	62.201	61.201	61.501	62.501	61.201	60.201	61.301	59.901	61.901	60.001	61.801	60.601	62.601	62.101	61.601	62.301	62.401	62.601	62.001	61.501	60.801	60.101	61.401	59.801	60.601	62.101	60.901
SP3-C11	58.201	59.501	60.001	59.901	57.601	59.301	58.601	60.801	62.001	62.501	62.601	61.301	64.001	59.301	59.701	60.401	59.901	60.701	61.901	60.701	61.301	60.801	60.401	62.901	61.301	59.401	60.901	60.101	60.301	60.101	60.801	60.401	61.201	62.101	62.001	60.401	62.601	62.101	60.101	61.301	62.201	59.801	62.501	61.201	61.201	61.401	62.701	61.601	62.501
SP31-C2	60.101	60.401	60.201	60.201	60.201	59.801	59.201	59.301	60.201	60.501	59.901	59.701	58.601	59.301	59.501	59.201	61.201	59.901	58.801	58.801	60.201	60.101	58.801	61.701	61.001	61.101	60.801	59.701	60.301	60.001	60.101	59.801	59.001	60.201	59.401	58.801	59.301	60.401	60.601	60.401	59.301	59.901	58.701	60.101	59.801	60.301	61.001	60.201	60.501
SP12-C2	59.201	59.301	58.601	58.301	59.201	58.701	57.501	60.101	61.801	62.601	61.001	61.501	61.701	60.101	60.701	60.301	59.701	61.801	58.101	61.501	61.101	61.701	61.101	60.501	60.701	61.701	59.401	61.001	61.701	59.601	62.001	59.101	62.101	62.101	61.001	61.901	61.101	61.201	61.801	63.101	60.401	59.201	61.901	61.201	59.901	61.801	62.501	61.301	60.901
TTCV1-VWP00522.2	59.701	60.201	59.201	60.001	59.801	58.101	59.101	59.201	58.701	58.801	59.601	59.701	59.401	57.601	58.901	59.101	59.101	60.001	59.201	60.201	60.801	60.101	59.201	62.101	60.101	60.001	60.101	58.201	57.501	58.801	58.701	59.101	60.301	60.601	62.201	61.401	59.801	60.001	59.901	59.101	59.901	58.101	58.301	57.101	60.001	59.301	60.201	60.701	59.801
TTV25-MfTTV9	62.001	60.001	60.801	59.501	59.901	59.601	60.601	61.801	60.701	60.901	60.601	58.801	60.401	59.001	60.901	60.501	58.101	61.801	60.601	60.701	60.101	60.701	60.201	61.601	60.401	62.601	61.501	59.501	59.701	59.501	59.801	59.401	61.201	61.001	61.401	60.001	59.701	59.101	62.301	60.101	59.301	58.601	60.601	60.701	59.401	59.701	59.701	62.401	58.301
TTCV2-VGA00120.1	59.401	58.301	59.401	59.201	58.501	59.401	58.701	58.601	60.501	59.301	59.201	60.001	61.301	59.601	60.301	60.701	59.401	59.901	60.901	58.501	58.901	57.901	57.801	61.501	57.501	60.501	58.801	58.301	58.801	60.601	59.801	57.601	60.101	61.001	61.301	60.201	61.501	60.701	59.201	60.601	60.001	58.201	59.701	59.301	60.501	59.901	60.001	60.501	59.701
TTV26-MfTTV3	57.301	58.301	57.601	58.701	57.601	58.601	57.501	58.801	60.101	59.101	60.201	59.201	59.001	58.301	57.201	58.201	57.701	58.201	57.901	58.701	59.401	59.901	57.601	58.501	59.301	60.101	59.101	58.501	58.901	58.201	57.801	61.101	59.501	60.001	58.501	59.601	60.901	57.401	58.401	59.101	60.301	60.201	59.201	59.501	58.801	59.101	59.401	60.101	57.901
TTCV3-VGA00123.3	60.201	60.401	60.501	60.501	59.501	58.601	59.301	58.401	59.501	60.101	59.701	60.601	59.501	58.301	57.501	58.201	58.201	57.301	57.301	59.401	59.301	58.401	58.401	60.001	57.001	62.001	59.401	59.201	58.801	58.301	57.601	58.301	58.301	58.501	59.801	59.201	58.201	58.301	58.801	59.101	57.601	58.801	57.901	59.101	57.801	59.601	59.401	58.701	59.701
TTCV5-VGA00154.2	60.301	60.601	59.601	58.801	59.601	61.201	59.601	60.401	59.201	58.701	59.101	59.401	59.401	58.801	58.801	58.201	58.601	59.701	58.701	59.501	59.701	59.601	59.101	60.401	57.601	60.101	58.601	58.001	57.801	59.501	59.001	59.301	59.901	59.001	60.301	60.301	60.501	59.201	59.301	59.801	59.401	58.201	59.001	58.901	59.301	58.001	59.701	60.701	59.101
[truncated: 143 more columns]
