# Supplementary material for: Exploring the Diversity of the Human Blood Virome
Source: Viruses. 2021 Nov 21;13(11):2322. doi: 10.3390/v13112322 (PMC8621239; doi:10.3390/v13112322)
Supplement: Supplementary file 1 [file viruses-13-02322-s001.zip › Supplementary_Table_S12.xlsx]

## Sheet: Hoja1
Supplementary Table S10. Pairwise nucleotide identity matrix obtained using ORF1 from TTMV sequences belonging to reference species, potential novel species from our previous study [18], and sequences described in the present study.
	SP4-C1	SP56-C6	TTMV18-D11	SP48-C7	TTMV17-ctcf040	TTMV15-LY1	TTMV16-ALH8	SP49-C5	TTMV13-zhenjiang	TTMV4-Pt-TTV8-II	SP6-C7	TTMV14-BNI-700620-G1-CSF	SP16-C1	SP43-C4	TTMV23-Emory1	Cpz1Cl2	SP51-C11	TTMV22-vzttmv4	TTMV5-TGP96	SP10-C3	SP36-C2	TTMV21-ctcd026	SP30-C4	TTMV20-Ctga035	SP58-C2	SP16-C16	SP51-C19	SP4-C2	SP23-C3	SP51-C7	TTMV7-CLC156	SP51-C18	P8-c22	SP51-C6	SP36-C4	SP30-C2	SP27-C2	SP1-C2	SP26-C3	P3-c8	SP43-C2	P7-c14	SP9-C1	SP45-C11	SP7-C7	SP7-C4	SP46-C5	SP16-C11	TTMV6-CBD203
SP4-C1	100.001
SP56-C6	72.401	100.001
TTMV18-D11	68.601	68.301	100.001
SP48-C7	69.201	70.401	67.701	100.001
TTMV17-ctcf040	66.901	68.001	65.801	70.101	100.001
TTMV15-LY1	66.101	65.401	64.501	65.701	64.101	100.001
TTMV16-ALH8	65.101	65.301	63.901	65.901	63.001	65.201	100.001
SP49-C5	65.601	65.601	65.301	66.301	63.601	65.101	62.801	100.001
TTMV13-zhenjiang	63.701	60.801	64.001	64.601	62.001	64.001	62.601	66.201	100.001
TTMV4-Pt-TTV8-II	63.401	64.201	65.001	64.401	63.301	63.601	64.401	66.801	63.601	100.001
SP6-C7	61.901	63.201	61.701	63.401	63.001	62.001	64.701	65.101	63.501	63.601	100.001
TTMV14-BNI-700620-G1-CSF	64.201	65.601	64.401	64.901	62.601	63.601	65.901	66.101	64.601	65.601	70.801	100.001
SP16-C1	65.901	64.301	64.501	64.001	63.801	64.101	64.201	64.901	63.401	64.201	65.901	64.801	100.001
SP43-C4	61.501	62.801	62.601	62.501	62.601	63.401	64.201	65.001	64.001	65.201	63.201	65.401	66.901	100.001
TTMV23-Emory1	62.201	61.301	63.701	64.001	63.301	63.801	63.401	64.201	64.601	63.301	65.201	63.101	64.201	62.701	100.001
Cpz1Cl2	63.501	64.101	63.801	63.301	62.801	62.301	62.201	65.601	62.901	66.401	64.101	64.701	64.101	63.601	66.101	100.001
SP51-C11	62.901	62.501	61.001	65.401	63.201	64.301	62.801	65.701	61.801	63.701	63.301	63.301	63.301	64.801	64.701	63.701	100.001
TTMV22-vzttmv4	64.801	64.101	61.201	64.801	63.001	62.701	63.501	63.101	63.401	63.201	61.501	63.601	63.201	63.601	64.901	62.001	66.601	100.001
TTMV5-TGP96	61.801	61.501	64.501	64.301	62.901	61.501	62.701	65.201	62.901	63.801	64.601	63.701	61.701	63.701	63.301	63.401	65.901	65.601	100.001
SP10-C3	63.001	61.901	59.601	60.901	63.101	62.701	60.501	61.101	60.101	62.001	62.701	61.301	62.601	63.401	61.701	61.401	61.701	63.701	61.901	100.001
SP36-C2	63.401	61.701	63.001	61.501	62.001	61.701	61.501	63.801	60.801	63.801	61.901	62.901	64.501	63.201	61.201	63.001	62.301	63.701	62.801	66.801	100.001
TTMV21-ctcd026	61.601	62.301	62.801	62.101	63.801	62.001	63.501	62.901	64.001	65.001	60.901	65.401	63.001	64.201	65.101	63.501	64.701	65.401	65.601	66.401	64.501	100.001
SP30-C4	64.301	64.501	61.201	62.501	64.201	62.301	62.501	65.701	63.601	64.601	64.401	63.501	65.901	61.501	61.901	64.701	62.801	62.601	60.401	62.401	62.301	63.301	100.001
TTMV20-Ctga035	63.501	64.101	60.801	62.501	63.201	62.701	62.701	64.301	63.201	63.701	64.301	63.601	64.901	62.201	63.201	63.901	62.401	63.201	60.401	62.101	61.301	63.301	92.901	100.001
SP58-C2	62.801	63.001	61.301	61.901	62.201	62.501	64.501	63.201	63.001	63.201	62.501	63.601	64.201	62.301	61.201	63.801	60.701	60.801	61.401	60.601	63.001	63.001	78.901	78.001	100.001
SP16-C16	64.101	62.401	61.601	60.301	63.101	61.101	61.601	63.701	61.401	62.201	63.001	62.301	64.501	63.801	61.801	65.701	61.901	63.101	61.301	61.301	61.601	64.401	70.401	69.001	69.701	100.001
SP51-C19	62.501	62.001	61.301	63.701	63.401	60.901	61.301	64.201	64.301	64.201	61.301	62.901	63.901	63.001	63.301	65.401	62.101	62.301	61.501	60.101	61.801	61.501	71.501	70.701	68.601	67.101	100.001
SP4-C2	63.501	62.901	60.301	65.001	63.601	62.101	62.501	63.301	62.301	62.301	64.401	62.901	64.401	62.401	62.401	63.001	63.401	61.301	61.701	62.001	62.601	63.301	68.601	67.401	65.301	65.601	67.201	100.001
SP23-C3	62.201	61.401	60.901	63.801	62.501	62.201	61.901	63.601	61.501	62.501	63.301	64.201	63.401	60.901	62.201	61.201	61.801	61.001	61.401	61.201	62.301	65.001	67.401	68.601	67.301	68.001	65.601	74.201	100.001
SP51-C7	64.001	64.501	63.901	63.401	62.301	61.601	63.101	64.901	61.301	65.201	63.301	64.701	65.901	64.101	63.701	63.701	64.301	62.201	62.201	64.201	67.201	63.501	64.501	64.301	64.001	62.201	63.201	63.401	65.701	100.001
TTMV7-CLC156	63.401	63.301	64.801	62.901	63.501	61.601	63.301	65.101	62.301	64.001	63.601	63.401	64.401	64.801	63.901	63.601	63.301	64.001	62.201	64.301	66.401	65.201	64.501	63.801	64.701	62.501	65.001	62.501	64.801	84.401	100.001
SP51-C18	62.901	65.201	62.701	62.401	63.301	62.101	62.201	61.901	63.401	63.301	61.601	62.201	62.901	63.801	63.501	61.801	63.501	61.501	63.201	64.501	65.501	63.301	62.501	61.201	61.201	62.201	63.101	63.101	63.701	66.001	67.701	100.001
P8-c22	64.001	62.501	63.301	63.101	63.701	62.501	64.701	63.001	62.601	63.701	62.601	63.501	64.201	61.701	63.501	61.201	60.801	63.301	61.801	63.301	62.301	60.901	64.801	61.901	63.601	64.701	61.101	60.601	62.601	64.001	64.601	66.001	100.001
SP51-C6	63.101	64.001	62.901	61.401	63.801	62.701	63.701	65.301	65.801	64.101	63.601	65.201	63.801	63.501	64.101	64.701	63.401	64.001	64.301	62.501	63.701	62.901	64.801	63.701	62.801	62.301	64.001	62.101	61.101	63.301	63.501	62.901	62.501	100.001
SP36-C4	62.601	63.501	64.201	62.101	62.301	61.201	63.001	64.801	62.801	65.301	64.801	64.901	64.601	62.701	63.701	64.301	63.201	63.301	62.401	62.001	62.101	61.701	65.001	64.401	63.701	62.801	64.601	63.401	64.101	64.701	62.901	63.101	62.701	66.701	100.001
SP30-C2	64.201	63.401	62.101	62.701	63.701	63.401	62.601	61.101	62.501	63.101	63.801	63.101	64.601	63.401	65.001	63.801	64.201	62.801	61.101	61.101	63.301	63.501	64.501	64.601	63.401	63.001	63.901	61.801	62.101	63.601	63.501	63.001	63.301	65.001	65.201	100.001
SP27-C2	61.401	61.901	64.101	63.601	62.801	61.501	62.601	62.401	62.801	64.801	61.501	63.501	64.901	62.801	64.401	62.701	61.801	61.801	60.301	62.901	66.101	63.201	64.601	63.801	63.601	60.601	62.401	61.601	60.601	62.801	62.401	62.601	64.501	64.801	65.101	77.001	100.001
SP1-C2	62.201	62.701	62.401	63.801	63.801	62.401	62.301	62.101	62.201	64.101	61.401	63.001	64.401	63.001	62.301	63.001	61.701	62.701	60.901	62.801	64.301	63.101	64.901	63.301	62.801	60.701	62.101	60.901	59.601	63.701	64.401	64.001	63.001	64.901	65.601	76.801	90.001	100.001
SP26-C3	62.201	62.101	64.301	64.901	63.401	62.301	62.901	63.601	63.001	64.401	62.201	62.601	64.601	62.801	63.601	62.901	62.401	63.701	61.301	61.701	65.101	63.001	64.801	64.101	63.101	60.501	61.701	61.401	61.101	62.601	62.901	63.201	62.501	64.701	66.601	76.701	88.601	89.401	100.001
P3-c8	62.501	61.501	62.701	64.101	63.101	62.601	63.601	62.701	62.101	65.501	61.901	63.801	63.901	63.801	65.101	66.201	61.001	60.901	63.901	61.401	65.301	63.701	65.101	64.201	63.801	62.101	63.901	62.201	61.501	62.201	63.101	63.301	62.901	63.901	65.301	70.401	70.201	69.701	71.101	100.001
SP43-C2	62.201	63.501	63.601	63.701	62.501	61.601	60.401	61.601	60.901	63.101	63.301	63.001	62.801	61.001	61.901	62.001	62.001	60.801	61.801	62.101	63.501	62.101	64.601	63.901	61.401	61.001	61.301	61.901	62.001	62.601	61.601	63.901	62.101	63.201	65.401	66.701	62.801	63.701	63.701	64.401	100.001
P7-c14	64.801	61.001	63.201	62.501	62.401	62.501	64.201	63.601	63.601	62.301	62.701	62.501	64.201	62.901	63.501	62.201	62.801	62.301	60.401	63.601	63.301	62.901	65.601	65.001	61.701	62.401	61.601	63.801	62.601	62.401	62.601	62.801	62.301	65.401	64.001	65.501	64.801	64.301	65.201	63.201	70.601	100.001
SP9-C1	63.701	64.001	60.601	64.201	62.001	62.101	62.701	63.501	63.201	62.801	60.301	63.301	63.601	60.101	63.101	63.301	60.601	60.901	61.001	62.301	61.501	63.601	61.501	60.901	60.201	61.701	64.201	62.101	63.201	65.301	64.301	60.701	64.501	63.201	65.101	65.301	64.801	64.701	64.301	65.101	62.701	63.001	100.001
SP45-C11	62.901	64.501	61.601	63.601	61.001	61.801	62.301	63.201	63.301	63.901	61.901	62.601	62.801	59.901	64.101	62.501	61.301	61.401	62.801	61.401	61.101	64.801	62.001	61.701	60.101	61.701	63.801	63.001	62.801	65.901	65.201	61.801	63.401	63.401	65.001	64.801	65.501	65.701	64.101	65.301	63.301	62.201	94.801	100.001
SP7-C7	62.301	63.501	59.501	62.901	61.101	60.701	62.401	61.801	60.101	63.101	62.201	61.601	63.601	60.501	61.801	60.601	61.901	61.101	62.601	62.101	60.001	63.701	62.001	59.401	60.701	61.301	61.201	62.501	62.601	63.801	63.301	60.601	62.901	60.801	65.901	66.201	64.401	64.901	64.601	66.301	62.201	61.601	92.801	93.101	100.001
SP7-C4	63.401	62.501	62.101	64.101	61.001	63.101	61.201	62.401	62.701	62.601	61.501	62.601	63.901	61.301	61.701	62.501	62.201	59.701	62.601	61.501	61.701	62.801	61.401	61.501	61.501	61.701	62.701	62.701	62.601	64.601	63.601	61.901	62.401	62.201	65.001	64.101	64.501	65.001	64.501	65.101	62.301	61.401	89.201	90.501	88.801	100.001
SP46-C5	64.001	64.201	62.601	63.401	62.501	63.401	62.301	65.601	63.401	63.001	60.301	65.601	64.101	63.301	62.301	62.901	61.801	63.201	61.401	64.201	63.601	61.901	65.101	62.701	63.601	64.801	64.301	64.301	63.601	65.401	64.501	63.501	63.701	63.001	65.601	65.701	64.301	64.901	65.601	66.201	64.201	64.301	85.601	86.101	83.701	85.901	100.001
SP16-C11	64.101	65.101	61.701	63.501	60.401	62.901	62.501	62.801	62.201	63.701	61.201	63.501	62.701	63.001	62.001	63.901	62.901	61.101	63.201	60.801	62.201	65.101	63.801	64.001	62.201	62.701	64.301	63.101	62.701	65.001	64.501	63.801	62.601	62.601	64.901	65.201	66.401	65.501	65.701	65.701	63.001	63.501	85.801	85.901	83.801	84.501	84.201	100.001
TTMV6-CBD203	63.301	62.201	61.301	63.101	62.801	61.101	60.901	63.601	61.701	63.901	61.301	62.601	62.101	61.001	61.401	64.301	62.301	60.601	60.001	61.901	60.701	62.901	64.001	64.001	63.301	62.901	63.601	62.201	62.001	64.301	64.601	61.401	62.801	63.301	64.701	65.901	64.701	65.401	65.201	64.901	63.701	63.301	68.801	69.001	68.201	68.601	68.401	68.101	100.001
SP35-C6	61.201	62.501	61.501	62.401	60.501	61.501	62.001	62.001	63.701	63.201	60.601	62.001	61.301	62.501	62.101	65.501	61.701	60.601	61.701	61.001	63.401	62.001	63.201	62.601	64.201	63.101	63.701	62.601	62.301	63.501	65.101	62.501	62.501	62.601	63.401	63.301	64.201	63.901	64.501	63.401	62.801	62.001	66.801	67.801	65.601	67.201	68.001	68.101	66.901
SP60-C4	63.101	62.001	62.401	62.801	61.801	62.201	61.101	63.901	62.801	63.201	61.501	61.701	63.201	60.401	63.301	63.401	59.701	58.401	61.801	60.201	62.001	63.101	62.801	63.101	63.801	63.001	62.401	61.801	63.001	63.301	64.301	62.701	61.201	63.701	62.501	65.301	66.101	66.401	67.101	65.301	64.701	62.701	65.401	65.401	64.801	65.201	66.501	67.301	66.601
SP51-C20	63.201	62.001	62.501	63.501	61.601	61.901	60.901	64.801	64.601	65.001	62.201	61.801	62.701	61.301	63.401	63.801	62.401	60.901	60.601	62.201	62.301	62.801	64.401	64.801	62.201	61.001	64.501	62.601	63.601	64.101	65.501	63.301	61.601	63.901	64.001	66.101	64.701	66.401	66.001	65.201	62.901	62.801	66.701	66.801	67.201	66.801	65.901	67.401	67.501
TTMV24-ctbc019	62.801	62.401	60.801	62.401	61.801	62.501	62.101	64.801	62.101	64.801	61.401	59.801	65.601	62.301	63.701	64.301	60.201	61.001	60.801	63.901	62.501	64.001	64.101	63.201	63.001	61.901	64.401	60.401	63.501	65.501	63.801	62.401	61.401	63.801	62.801	65.301	64.001	64.901	66.301	65.601	62.801	64.201	66.401	66.401	66.401	66.201	67.401	66.901	67.901
SP20-C3	62.501	63.101	64.601	63.101	63.401	62.801	62.901	63.401	62.901	63.301	62.201	63.901	64.701	62.401	63.001	64.501	61.801	59.701	62.101	61.401	62.001	64.301	61.701	63.601	63.801	61.101	62.701	63.601	62.201	65.501	64.901	62.301	61.401	62.701	63.001	64.101	64.301	64.201	64.201	61.801	62.401	64.401	68.501	68.201	66.601	67.101	68.401	69.001	66.801
SP6-C2	63.001	62.301	61.601	63.301	64.601	61.301	61.401	62.201	62.201	63.001	60.901	61.301	63.601	61.301	62.801	63.501	61.101	61.601	63.801	61.501	62.101	61.701	62.301	61.701	64.101	62.001	61.601	62.301	62.201	63.001	65.101	61.601	64.101	62.001	63.401	61.601	61.801	62.201	61.501	63.201	62.001	62.601	62.101	61.501	61.601	61.201	64.901	62.701	61.401
SP28-C4	62.001	63.101	60.601	62.201	62.401	61.301	61.101	63.701	62.501	64.001	60.601	65.201	62.701	63.301	63.801	62.701	62.201	61.401	61.501	61.301	65.001	62.901	62.301	62.501	63.501	61.601	60.401	61.401	62.701	64.701	64.001	63.601	63.401	62.701	64.001	64.001	64.901	63.501	64.501	62.901	64.501	63.201	65.301	64.801	64.501	63.901	65.601	65.901	63.701
TTMV9-CLC062	63.901	60.301	61.001	63.301	60.301	61.701	60.601	64.201	62.701	63.801	61.501	60.601	62.401	61.101	62.701	62.301	59.601	61.101	62.501	62.801	64.401	65.501	63.601	62.901	62.301	60.501	62.301	61.201	61.901	64.001	62.801	62.901	63.201	63.701	64.701	63.201	63.301	62.501	63.801	62.301	64.001	63.901	63.301	62.401	60.801	63.101	64.601	65.301	64.301
P5-c2	63.001	61.801	63.101	63.101	63.101	60.801	63.601	62.201	62.001	63.201	62.901	65.301	64.201	62.701	62.801	63.801	62.101	61.801	63.301	63.701	65.301	65.501	64.101	64.201	62.001	63.601	60.701	63.101	65.001	65.501	63.701	63.301	63.501	61.701	63.201	63.101	63.001	63.601	63.401	62.601	63.001	64.501	65.401	65.101	64.101	64.001	65.901	64.701	64.301
TTMV27-ALA22	63.601	62.501	63.701	62.701	61.801	63.801	63.501	63.401	63.801	64.201	59.401	63.501	64.501	61.701	61.101	64.901	61.601	62.901	63.101	63.801	65.401	63.701	63.201	63.001	62.501	60.301	60.801	63.201	63.501	65.001	63.901	63.601	63.201	62.801	64.601	64.201	63.301	63.601	62.501	64.801	64.201	63.101	64.801	64.201	63.101	62.501	64.501	65.001	64.001
TTMV8-PB4TL	63.801	65.101	63.601	63.901	62.701	63.501	62.901	66.401	62.901	64.401	62.101	63.701	66.501	64.001	63.401	64.801	62.901	62.801	63.001	64.601	64.501	62.101	63.701	62.601	62.601	63.101	64.401	63.301	62.701	64.401	64.201	62.701	63.101	64.801	66.101	65.701	63.001	64.101	64.601	64.401	62.801	63.401	65.201	64.801	63.701	64.601	64.601	65.301	63.601
SP41-C2	62.001	61.901	61.801	62.201	63.401	60.601	63.201	60.901	61.401	63.501	60.501	61.701	64.501	62.301	62.101	62.801	61.601	62.001	61.701	62.701	62.701	61.601	61.101	62.101	62.901	61.601	62.901	61.701	62.701	61.801	63.201	63.301	61.801	62.301	61.901	63.901	64.601	64.901	64.601	62.701	62.101	61.501	62.601	62.901	63.201	62.801	63.201	63.801	63.901
SP48-C3	63.101	62.301	62.501	62.501	63.001	63.001	62.501	63.201	61.801	63.201	61.001	61.201	65.301	62.401	62.401	63.201	62.501	63.101	60.901	62.401	64.101	61.901	61.001	60.401	62.501	62.201	64.301	63.201	62.101	62.601	62.001	63.801	62.701	62.601	62.301	63.101	63.601	63.201	64.001	63.401	64.201	62.001	62.201	62.901	61.201	61.101	62.101	61.401	63.101
SP56-C2	63.701	62.401	62.401	62.601	61.601	63.301	63.201	63.301	61.401	62.701	60.501	62.001	63.401	61.101	62.201	63.001	63.401	60.501	62.001	62.401	63.001	61.001	61.401	62.201	62.401	60.601	61.601	61.201	61.301	63.601	62.901	62.701	63.101	63.001	63.801	64.401	64.401	63.201	64.201	64.001	63.201	63.801	64.301	63.901	65.201	62.201	62.901	64.101	64.701
SP35-C2	63.601	61.701	61.101	62.401	61.601	61.501	62.401	62.001	62.901	61.401	60.301	61.001	61.301	61.001	61.801	63.301	62.901	60.101	61.401	61.501	62.101	63.101	62.901	63.301	63.001	62.801	61.701	61.901	64.001	62.101	61.601	63.101	61.801	61.901	62.801	63.001	61.301	62.201	61.601	64.401	63.001	61.101	63.201	63.301	61.701	61.501	63.901	63.301	63.501
SP35-C4	60.901	61.101	62.101	61.901	61.501	60.901	61.601	62.401	61.601	62.801	61.401	61.901	63.101	60.801	61.201	64.601	62.801	61.401	62.201	61.901	61.701	63.701	61.601	61.601	60.401	61.101	62.401	62.401	62.401	62.801	64.201	58.901	62.501	60.901	62.401	63.701	62.701	63.401	63.401	60.401	63.701	61.801	61.701	62.301	61.801	61.701	62.301	63.501	65.401
TTMV12-LIL-y3	62.201	62.601	61.501	61.001	61.101	61.601	62.301	62.901	61.001	61.901	61.301	61.101	63.201	60.601	63.201	63.101	60.801	59.901	60.801	60.101	61.901	62.501	62.501	61.801	59.901	59.201	61.701	61.601	60.901	62.701	63.301	60.201	62.701	61.701	61.901	63.801	62.401	63.601	62.501	61.201	61.701	62.201	60.901	62.301	62.101	63.201	62.501	63.801	65.301
TTMV26-SHA	63.801	64.101	62.901	64.501	62.901	62.301	62.901	64.001	62.501	63.001	63.001	61.601	64.101	62.601	61.201	64.001	62.901	61.201	63.801	62.901	62.501	62.201	61.801	62.101	62.301	60.801	62.101	61.401	62.901	63.601	63.001	63.001	62.901	63.601	63.601	62.701	65.401	64.001	66.101	65.501	63.801	62.301	64.701	63.401	63.101	63.101	67.201	64.101	64.501
SP16-C17	62.901	65.101	62.501	62.501	62.801	62.301	62.101	63.801	62.001	64.601	63.301	63.401	64.501	62.301	63.501	64.401	62.301	63.201	61.001	60.901	61.401	62.101	65.001	63.801	61.501	61.801	65.201	62.501	63.601	62.701	62.701	61.801	62.601	63.801	63.301	64.801	64.201	63.901	64.001	62.401	62.101	62.201	63.001	62.801	63.601	62.101	64.101	63.101	65.201
TTMV19-LY3	63.801	62.701	65.101	63.501	62.401	65.101	63.801	63.201	62.501	64.701	62.301	62.701	63.701	62.801	63.701	64.701	61.601	62.901	60.601	60.501	60.901	61.601	64.301	63.501	64.301	62.201	63.101	63.201	65.101	64.901	62.901	61.501	62.201	62.401	63.101	63.901	63.501	64.301	62.801	63.101	61.101	61.501	62.801	62.101	62.001	61.201	62.601	62.001	62.801
SP8-C2	63.701	64.901	63.701	63.501	63.001	62.601	63.201	65.001	62.401	64.501	64.701	63.801	63.001	61.401	62.501	64.301	62.501	64.301	61.101	60.901	60.301	61.301	62.301	63.501	62.301	61.301	61.801	60.501	62.301	63.201	62.701	61.601	63.401	63.001	64.101	63.001	64.001	62.301	63.901	61.101	61.801	62.401	62.201	61.901	62.501	62.501	63.401	62.501	62.601
SP53-C1	60.101	61.601	63.001	63.801	63.001	64.501	62.401	64.501	61.001	64.001	63.001	61.701	62.401	61.101	64.001	65.501	64.101	62.301	63.201	60.801	60.601	62.701	63.801	63.901	62.001	59.601	63.601	60.901	62.601	63.701	64.401	62.201	61.701	63.401	65.301	63.401	64.101	63.701	65.001	64.101	60.501	63.201	64.001	64.301	63.501	62.801	64.501	62.001	62.801
SP51-C14	64.401	63.901	62.201	63.201	64.301	63.001	61.601	64.401	63.301	63.301	61.101	62.901	62.701	62.001	59.601	61.901	61.801	63.301	62.501	62.201	61.701	63.801	64.801	64.301	63.201	63.301	64.401	63.401	62.101	61.801	61.501	61.401	63.101	64.001	63.201	64.201	63.101	62.801	63.701	61.901	61.601	61.801	64.201	63.401	64.501	62.701	65.201	62.901	65.001
SP24-C8	64.401	63.601	62.001	65.001	64.001	61.701	61.001	63.201	63.701	63.401	62.301	62.101	62.801	62.101	62.701	63.101	61.901	64.701	63.301	61.601	62.401	62.601	63.801	62.901	63.501	62.401	63.101	63.801	62.901	61.901	62.301	62.001	62.501	64.401	64.701	63.401	63.401	63.101	63.601	61.801	62.001	61.201	64.901	64.001	63.901	62.901	63.501	63.701	62.601
SP41-C4	64.601	63.301	62.801	64.701	63.901	61.701	61.701	62.801	63.001	63.601	62.901	60.801	63.501	62.701	63.001	61.701	62.101	62.401	63.601	62.001	63.001	62.801	64.501	63.001	64.101	61.901	63.401	62.401	62.201	62.501	61.601	62.001	62.701	63.601	63.501	63.201	63.101	63.901	64.101	62.601	62.701	61.401	64.901	62.901	62.901	64.401	64.501	62.701	62.301
SP24-C7	62.601	64.001	62.101	63.601	63.001	61.501	61.301	63.601	62.001	65.001	64.301	63.601	63.001	62.601	63.001	63.501	64.101	62.401	62.901	62.701	60.501	63.001	62.501	63.201	63.301	64.901	61.701	64.001	63.701	64.801	65.301	61.401	64.401	62.701	62.201	63.001	63.401	62.901	63.201	63.701	61.201	62.401	63.601	64.601	62.801	64.001	64.501	63.801	63.401
SP47-C8	62.701	63.201	59.801	61.601	62.101	61.901	63.501	62.501	61.501	63.801	64.601	64.001	63.801	62.801	62.501	63.401	62.701	61.401	62.101	61.601	60.601	63.001	63.801	62.901	63.201	61.801	61.801	63.101	62.701	64.701	64.001	61.801	63.201	61.801	61.101	60.701	63.601	62.901	63.601	63.601	62.701	62.801	64.101	63.201	63.101	64.101	63.201	65.201	63.701
SP36-C3	62.901	62.501	61.901	61.401	62.301	63.501	62.301	63.801	61.601	64.601	64.401	63.401	63.401	62.001	62.601	63.301	61.001	61.501	62.401	61.801	59.101	64.701	63.101	64.001	62.801	63.001	61.101	64.801	62.901	64.301	65.301	62.501	63.901	63.001	61.901	62.301	63.001	62.701	63.301	64.101	62.401	65.001	64.001	63.901	63.301	62.701	63.101	63.401	64.401
SP57-C2	64.101	65.501	61.301	62.601	63.301	63.001	62.201	63.301	61.201	62.001	63.601	63.701	64.001	63.001	63.501	62.201	62.301	62.601	62.701	62.101	60.401	63.701	62.301	63.001	64.201	62.101	60.901	62.501	63.301	64.501	64.901	62.801	64.001	63.301	62.401	61.601	63.901	62.201	62.901	64.801	61.601	64.101	62.701	62.401	64.401	63.801	65.301	65.101	64.501
SP30-C5	62.601	64.201	61.501	62.501	62.501	63.001	64.101	64.201	62.701	64.001	63.401	64.101	63.401	62.701	63.401	62.901	63.201	63.301	60.201	62.401	60.801	62.901	62.501	63.301	63.601	63.801	61.101	63.301	61.301	63.501	65.201	59.901	64.001	63.101	62.101	61.301	63.401	62.501	63.901	64.601	61.201	64.301	63.501	63.201	64.401	63.401	64.301	63.501	62.701
SP43-C6	61.901	63.101	62.001	62.201	63.301	64.301	64.201	62.701	61.401	62.801	64.001	64.501	62.301	63.101	63.001	64.401	63.301	63.801	60.901	60.601	62.701	61.801	64.501	64.201	63.401	63.401	62.601	65.001	62.301	63.301	65.001	60.901	64.901	63.001	63.601	62.501	63.801	63.601	63.501	62.601	64.001	65.501	63.601	63.701	63.601	63.101	65.201	63.001	61.301
SP16-C15	63.301	61.101	62.601	65.201	62.701	61.301	62.601	64.201	63.401	62.301	63.301	60.801	60.901	61.301	64.001	61.501	63.601	63.001	62.701	60.701	60.601	63.901	61.001	61.801	61.801	61.201	62.501	59.901	61.801	62.001	63.301	60.301	62.501	64.101	64.101	60.901	61.101	61.201	62.601	62.301	61.801	63.101	61.801	62.101	60.701	61.401	64.501	62.101	60.701
SP41-C5	62.701	61.801	64.201	64.701	61.701	61.401	61.201	62.501	61.501	62.701	63.001	62.001	62.101	61.901	63.701	63.901	62.101	62.301	61.401	60.501	61.801	60.601	63.401	63.301	61.001	61.001	62.301	60.601	62.901	62.901	65.001	60.501	61.201	65.001	63.501	60.601	61.301	61.901	61.601	63.001	60.901	62.601	62.401	62.501	61.401	62.101	65.401	63.401	61.101
SP1-C6	64.101	64.101	65.501	66.401	64.101	64.001	65.201	64.401	65.801	65.301	65.001	64.801	64.701	66.101	64.101	62.601	65.301	63.401	64.501	61.801	64.401	58.901	62.401	65.101	63.701	64.601	65.601	65.901	66.901	67.601	66.201	65.401	63.501	66.201	65.701	64.401	64.501	66.001	64.801	66.201	64.001	66.201	64.001	63.901	63.301	64.101	59.101	64.401	65.101
SP51-C8	62.401	63.801	62.601	65.101	62.501	62.201	61.701	63.001	61.901	63.901	61.701	63.901	62.701	61.501	61.001	61.401	61.601	61.401	62.301	62.301	61.801	61.601	61.401	62.901	61.001	61.301	64.001	62.801	63.301	62.801	63.301	64.001	62.601	63.101	65.201	60.601	61.101	60.701	59.901	61.501	62.001	62.401	63.301	64.201	63.801	62.801	65.101	62.901	62.601
SP22-C5	62.401	62.801	63.101	64.801	63.001	63.301	63.801	65.501	63.701	63.101	62.701	63.001	63.801	62.901	63.001	62.901	63.301	63.301	62.201	62.901	61.101	62.201	62.101	61.401	61.901	60.601	64.101	62.301	61.601	63.901	64.301	62.101	65.101	65.201	64.401	63.101	63.001	61.601	62.101	62.201	62.101	64.101	63.001	62.601	63.401	62.901	63.301	63.301	62.701
SP43-C5	64.201	63.101	63.801	63.401	62.501	63.801	63.201	62.901	61.901	63.001	63.001	64.701	64.601	61.101	63.101	61.101	61.001	63.401	62.001	61.701	61.901	61.301	62.601	61.401	62.201	60.301	63.401	62.601	62.101	65.501	64.701	63.101	61.701	65.901	63.801	62.201	62.801	61.001	61.401	62.301	62.501	63.401	63.501	62.201	63.501	63.301	64.901	62.301	63.301
TTMV1-CBD279	62.701	63.001	63.701	63.101	63.701	61.501	62.201	63.701	63.001	64.001	64.201	63.801	64.301	61.801	62.101	61.501	61.801	62.501	62.201	61.301	62.701	62.401	62.801	61.601	62.101	61.001	62.201	61.401	60.601	64.701	63.701	62.401	62.201	64.701	64.301	61.901	60.401	60.901	61.201	64.201	62.801	63.501	64.901	65.401	65.201	63.001	65.101	64.301	62.501
SP6-C4	63.701	65.101	63.101	62.201	61.101	62.701	62.401	62.201	62.501	63.401	63.301	63.401	63.001	62.201	61.901	62.501	62.801	62.701	62.501	62.801	62.301	63.601	62.601	62.201	62.801	62.001	62.601	62.901	63.401	64.001	65.701	62.101	63.001	62.201	64.301	62.801	61.001	62.601	61.301	63.101	63.201	62.701	61.801	61.801	63.301	60.701	64.501	60.901	62.301
P8-C16	63.001	65.601	65.001	62.301	62.101	63.201	63.101	62.601	61.901	62.701	62.001	63.001	63.101	60.001	61.701	62.901	61.601	63.401	63.101	61.601	62.401	63.701	62.201	62.701	61.501	60.401	62.101	62.201	63.701	62.701	64.001	60.201	60.801	62.701	63.701	62.701	61.501	63.001	62.201	62.601	63.601	64.901	63.501	63.301	65.001	62.001	66.301	62.501	61.001
SP49-C6	62.001	64.901	64.001	61.301	63.801	63.901	64.301	63.501	62.701	61.001	63.501	63.101	63.301	62.301	62.501	62.501	62.201	62.701	61.601	60.401	62.101	62.501	61.501	62.601	61.601	63.001	63.601	62.101	62.301	63.901	62.801	61.901	62.001	62.701	63.301	62.801	62.701	62.301	62.601	62.801	62.501	62.501	61.801	61.901	62.301	62.701	62.901	62.601	61.401
SP7-C5	62.701	64.201	64.101	62.901	62.401	61.801	62.601	62.501	62.801	61.501	63.601	63.001	62.501	61.801	62.901	63.001	61.601	62.101	64.401	61.501	61.601	62.501	63.001	63.301	61.401	61.201	62.301	62.801	63.001	62.801	64.101	61.401	61.601	63.401	62.801	63.501	62.301	64.001	65.201	60.801	61.801	65.001	63.501	63.001	62.001	63.101	63.801	62.401	62.601
SP30-C6	63.201	64.201	63.401	64.701	63.101	63.201	62.601	62.201	62.801	62.701	63.701	63.301	63.001	61.401	63.301	61.501	61.701	63.701	64.301	62.701	62.201	63.901	62.901	62.801	62.401	61.801	63.001	63.301	62.401	63.501	65.001	60.401	62.601	62.601	62.601	62.501	63.301	62.601	64.701	61.701	62.701	65.301	63.401	63.201	62.501	63.101	64.601	63.001	61.801
SP45-C6	62.501	64.501	63.501	63.101	62.101	62.401	62.501	63.501	62.201	61.601	61.501	61.901	62.901	61.701	63.901	62.401	63.301	61.901	64.701	60.001	60.601	60.501	62.601	62.701	61.501	61.901	62.801	61.901	62.001	63.301	64.201	59.901	61.501	62.501	61.501	63.401	62.201	64.001	64.901	61.901	61.401	65.401	63.001	63.101	62.101	63.101	63.301	61.901	60.901
SP45-C12	63.001	63.201	63.201	62.001	63.301	62.701	64.601	62.401	64.501	64.001	64.101	64.701	62.001	62.601	62.701	62.201	63.701	63.501	64.601	61.901	61.301	61.801	63.901	64.001	61.401	61.901	62.701	61.801	62.501	64.901	65.301	59.501	62.101	63.601	62.301	64.301	63.301	61.901	65.401	61.801	63.601	63.701	64.801	63.101	63.601	63.601	65.401	64.001	61.401
TTMV31-ctbb016	63.701	64.201	63.301	61.901	62.801	64.101	63.501	62.801	62.601	62.301	63.501	62.001	63.101	61.901	62.701	62.401	61.301	63.001	64.301	60.601	62.401	60.801	64.201	64.001	63.001	61.901	62.001	61.001	62.601	64.501	64.801	60.401	62.101	61.601	62.901	63.501	63.701	63.101	64.001	62.501	64.101	64.001	63.301	63.001	61.801	63.001	64.801	63.501	62.601
SP60-C5	63.301	65.101	59.601	60.401	61.801	61.701	62.901	64.101	62.101	64.501	63.601	63.501	62.401	62.501	62.301	64.101	62.401	62.701	62.601	61.101	61.201	65.301	64.501	64.501	63.201	62.501	61.301	61.301	61.901	62.501	62.301	59.101	60.301	62.601	61.301	60.901	60.701	61.601	61.001	61.401	62.801	62.901	62.101	61.501	62.001	62.701	62.301	62.201	62.201
SP22-C6	64.001	63.901	62.201	62.501	63.401	62.401	62.601	61.601	61.801	64.601	61.901	63.301	62.301	63.001	63.301	64.101	64.101	62.001	62.501	61.101	62.601	60.701	61.801	61.601	62.501	62.401	61.001	61.801	61.901	62.301	64.601	61.601	63.301	64.401	61.501	61.301	62.601	60.901	62.501	61.601	63.301	63.701	62.601	61.201	61.801	62.001	61.701	60.501	62.601
SP37-C6	62.201	64.501	62.801	63.701	64.601	61.501	62.201	61.401	60.801	64.201	62.601	61.601	62.801	62.901	62.301	63.201	62.001	61.901	63.801	60.301	61.301	63.301	59.901	60.601	61.901	61.001	60.401	61.401	62.501	61.901	62.901	60.801	63.001	62.901	62.401	61.701	62.501	61.901	63.101	62.001	62.301	64.001	61.001	61.101	60.301	62.301	62.701	60.801	61.901
SP51-C17	62.001	64.601	62.801	63.101	65.501	61.401	61.901	61.301	62.301	64.301	62.801	63.101	63.001	64.101	62.401	63.301	62.501	63.701	62.301	61.701	62.401	61.301	62.301	61.201	61.801	60.101	59.701	63.301	62.601	63.201	63.401	62.101	62.301	63.901	62.701	61.901	61.701	61.601	62.901	62.101	62.501	64.001	62.101	62.801	61.701	61.801	63.201	61.501	62.901
TTMV32-222	63.601	64.001	63.201	63.801	64.501	62.001	62.301	62.001	62.001	63.001	62.001	63.101	64.401	64.301	63.701	64.801	63.101	63.601	62.901	59.201	62.101	63.501	62.101	61.601	62.301	60.801	60.001	62.401	62.801	62.401	64.001	60.201	63.201	63.601	61.701	62.301	63.601	61.901	63.401	63.001	63.601	63.301	60.701	61.501	61.401	61.701	61.101	62.001	61.701
SP15-C7	64.101	62.601	62.301	63.901	62.401	62.701	61.201	62.501	61.801	62.701	63.101	62.601	62.001	63.301	63.601	62.901	62.201	62.701	62.201	60.301	60.401	61.501	64.501	64.101	63.301	60.801	62.201	62.401	62.001	62.401	62.401	62.201	60.201	63.901	63.601	62.901	60.701	62.201	62.601	63.201	63.601	61.801	63.001	63.601	63.301	61.801	63.201	64.501	61.101
TTMV34-ctbf050	65.901	65.001	62.501	62.401	63.501	63.701	62.001	63.501	62.801	64.001	62.301	63.101	62.301	63.001	63.701	63.901	62.101	64.401	64.301	61.301	60.801	60.501	64.201	63.301	64.101	63.101	64.001	63.901	60.901	62.701	62.501	62.601	60.801	63.501	62.801	62.501	63.101	61.601	63.401	62.101	65.001	62.801	63.601	63.401	64.201	63.901	63.401	64.401	62.101
SP56-C4	62.501	61.701	63.201	62.301	61.701	62.401	65.501	63.901	61.701	63.101	62.701	62.001	61.401	60.901	61.101	62.601	62.901	63.801	62.601	61.201	62.101	61.601	62.601	61.501	61.201	61.201	62.401	61.501	62.501	63.901	62.201	62.301	61.001	62.401	63.001	62.701	62.801	63.001	63.701	63.801	62.601	63.501	60.901	61.101	60.701	60.901	64.801	62.101	62.101
P8-C26	63.501	62.701	61.101	61.401	61.401	62.501	62.301	62.001	62.601	63.301	62.201	63.201	61.301	62.001	64.201	62.401	62.501	62.901	61.001	61.801	61.901	62.201	62.801	63.201	62.001	60.901	62.401	61.701	60.901	63.601	62.501	61.001	63.401	62.501	61.001	62.701	63.601	61.901	61.301	61.801	61.901	63.201	61.601	61.401	60.701	61.901	64.501	62.501	61.401
TTMV28-BNI-700835-G3-CSF	62.601	63.401	63.201	62.201	64.101	63.101	63.901	63.101	61.901	63.001	61.701	61.301	64.901	63.901	62.701	63.501	62.001	61.901	61.201	61.301	62.601	64.001	61.801	62.201	61.301	61.701	63.101	62.801	60.801	63.501	63.901	61.201	62.601	63.001	62.201	61.501	63.101	61.801	62.201	63.701	64.001	63.401	62.401	62.101	62.101	62.501	65.901	63.101	62.401
SP23-C4	62.301	60.601	61.301	63.101	61.901	60.901	63.601	61.701	62.001	63.701	62.301	61.801	63.201	61.001	61.501	62.201	60.601	62.101	61.501	60.201	62.501	63.801	62.101	62.101	62.601	61.001	62.501	62.101	60.301	62.601	63.201	60.301	61.601	62.001	63.001	62.901	61.401	60.901	62.501	63.001	61.701	61.501	61.501	62.201	61.701	59.901	63.101	62.801	60.901
SP11-C2	64.101	62.801	63.201	63.001	63.001	64.501	65.101	63.101	62.901	64.401	61.101	62.701	62.301	63.301	63.001	65.701	60.901	62.501	61.901	62.001	63.801	64.501	64.301	64.901	61.601	62.601	61.901	61.501	62.001	64.401	65.601	62.501	63.401	63.601	64.201	62.701	64.301	62.901	63.501	63.501	62.101	63.601	62.801	62.201	61.701	61.201	62.601	63.801	60.201
SP15-C6	63.001	63.701	60.501	62.301	60.401	63.301	63.601	62.801	62.501	63.301	63.201	62.301	63.301	62.101	61.901	64.201	60.801	63.201	60.501	60.901	60.501	63.801	62.001	61.501	62.201	61.901	62.501	62.801	62.101	63.601	63.301	63.501	62.501	63.001	62.001	61.501	63.801	62.301	62.001	61.501	61.001	63.701	61.201	62.401	60.801	62.301	62.801	62.201	63.501
SP60-C8	63.601	63.501	63.601	63.601	63.401	62.701	64.201	63.601	63.601	64.801	62.001	63.501	61.501	62.301	63.401	64.201	62.601	63.001	61.301	60.901	60.501	62.801	63.301	63.401	60.101	61.401	62.201	61.601	61.601	62.701	64.001	63.701	62.101	63.601	62.701	62.001	62.801	63.501	62.701	63.101	61.801	60.701	61.701	60.301	60.201	62.101	63.301	61.901	61.101
SP30-C7	63.901	64.101	62.501	63.201	64.101	61.701	63.501	62.901	62.301	63.501	62.001	62.201	62.501	63.601	61.401	63.601	61.701	62.101	61.701	61.301	63.001	62.501	64.101	63.501	62.601	60.501	62.201	62.601	61.501	62.301	63.201	60.601	62.701	63.701	62.501	63.101	64.801	63.601	62.801	62.201	61.901	63.401	62.501	61.301	60.401	62.801	64.001	61.001	62.001
SP43-C8	62.001	63.001	62.001	63.901	63.901	62.001	64.501	63.101	62.601	63.001	62.801	61.901	61.701	63.801	63.001	65.401	63.001	61.901	60.301	61.301	62.001	65.701	63.201	64.101	63.001	62.501	64.101	64.501	61.801	61.901	61.301	61.201	63.901	64.401	61.201	62.701	62.601	62.901	61.801	63.001	60.701	63.801	60.401	60.301	60.501	61.201	63.901	61.001	63.001
SP51-C24	65.201	64.701	62.201	63.001	65.201	63.301	64.801	63.001	63.501	61.501	62.901	63.101	62.701	62.901	61.901	62.601	62.101	63.101	62.301	62.301	63.601	66.201	64.101	65.201	63.101	61.001	62.701	62.901	60.701	65.801	65.201	62.601	62.601	64.301	63.101	61.901	63.001	62.401	63.201	61.601	62.901	63.001	61.401	60.801	60.701	60.501	63.901	62.201	62.301
TTMV2-NLC023	64.001	63.101	62.601	62.101	64.801	62.701	64.501	63.201	64.001	62.701	63.701	63.801	62.901	62.101	61.901	63.301	62.401	63.001	60.901	61.401	62.601	62.301	64.501	62.901	63.201	61.201	63.501	62.801	62.801	63.101	63.301	62.101	61.401	65.201	64.501	63.001	61.901	60.701	62.401	61.301	61.101	62.701	62.101	60.901	60.501	61.601	62.301	61.801	62.301
P1-c22	62.301	63.401	60.601	63.101	59.201	63.001	61.601	64.001	63.801	63.701	63.801	62.101	61.801	60.701	62.101	63.601	61.701	60.901	62.801	61.401	62.401	61.401	62.501	63.101	59.601	60.401	61.801	60.601	62.201	63.601	63.901	61.201	59.901	63.701	61.601	61.401	62.101	61.601	61.801	62.801	59.401	63.701	63.601	64.301	61.701	65.201	63.801	63.101	60.901
GorMCl4	61.201	62.501	60.901	62.701	60.901	63.401	62.901	64.801	64.201	64.901	63.501	64.801	64.001	64.001	63.601	64.801	61.901	62.501	62.901	60.801	61.601	62.901	64.901	63.401	62.801	63.801	63.001	60.601	62.001	60.501	63.401	62.301	62.601	62.601	63.601	62.601	63.001	63.701	61.801	61.401	60.701	63.601	63.801	63.001	64.601	63.701	63.901	63.901	61.501
SP48-C4	61.701	62.601	61.701	64.501	62.501	64.701	64.401	63.901	62.901	63.601	64.001	65.101	65.501	61.901	63.001	63.101	62.201	61.501	61.801	63.301	61.601	60.901	65.201	64.801	64.701	64.001	63.201	60.901	61.901	64.101	62.401	62.001	64.201	62.001	63.601	63.701	63.701	64.501	63.501	62.701	61.501	63.001	63.701	63.601	64.501	62.701	63.201	64.601	63.501
TTMV29-Emory2	63.201	64.201	63.901	62.801	61.101	62.701	64.201	61.801	62.101	62.901	64.201	64.901	64.201	64.001	63.001	62.101	64.001	63.001	63.701	62.101	62.401	62.901	63.801	63.901	62.801	63.301	61.101	60.401	62.001	63.401	63.201	64.001	62.801	62.201	60.701	63.901	63.901	62.101	63.001	62.801	62.001	62.401	63.401	62.901	62.601	62.201	63.001	63.801	63.301
SP42-C2	63.001	60.301	61.101	62.301	60.001	61.901	61.901	62.301	63.801	61.701	62.701	61.801	63.501	62.701	60.701	62.401	62.101	63.301	61.901	60.501	61.001	62.801	61.501	61.401	61.601	60.501	58.901	61.201	60.601	63.101	62.401	63.801	62.601	61.301	59.901	62.301	61.101	60.701	61.101	62.701	60.901	62.001	62.901	60.901	63.501	62.801	63.501	64.201	61.501
TTMV3-NLC026	63.601	65.901	62.001	62.401	63.501	62.801	62.501	63.001	62.401	61.901	60.501	63.001	63.601	62.001	62.601	63.401	62.801	62.401	61.801	62.401	62.201	63.901	62.501	63.001	61.001	62.901	60.501	61.901	62.201	64.101	63.201	61.901	61.801	64.101	63.901	63.501	61.801	61.201	63.501	62.001	62.801	64.501	62.001	62.901	63.501	62.101	64.701	65.301	61.101
SP35-C8	64.601	66.701	62.201	63.101	64.701	63.701	62.801	62.101	62.501	62.501	62.801	64.101	62.701	61.701	61.801	63.501	62.401	64.501	62.901	62.401	63.201	62.101	63.201	61.001	61.601	63.001	64.601	63.501	60.501	64.001	64.701	64.401	62.601	61.401	62.901	62.301	61.401	61.501	60.601	62.301	62.101	60.801	62.401	63.001	63.001	61.401	62.701	63.101	63.401
TTMV33-ctbi042	63.101	62.501	60.601	59.801	61.801	63.201	62.701	64.501	64.501	62.401	61.701	64.701	64.501	64.701	63.801	61.601	65.401	62.301	63.401	63.301	63.301	59.901	62.301	61.701	63.401	63.201	61.701	61.401	62.901	62.601	63.801	61.701	63.501	63.701	63.801	61.601	62.601	64.001	64.401	63.001	61.301	61.901	62.001	62.401	61.101	63.101	59.301	62.401	63.601
SP46-C2	62.201	63.201	61.001	62.301	63.701	64.001	63.401	63.201	62.001	61.401	61.901	64.301	63.201	62.901	61.101	61.901	60.801	61.401	61.701	60.901	61.701	62.001	62.901	62.901	61.601	60.201	62.201	61.701	61.501	61.801	60.101	60.801	61.001	64.501	61.801	61.401	61.801	63.901	63.601	60.101	60.801	62.501	62.401	62.401	61.801	61.501	62.801	62.301	62.101
SP51-C9	61.001	62.101	60.901	62.201	64.101	63.901	62.101	63.501	62.301	63.201	62.501	62.701	62.501	64.001	62.301	62.601	61.601	62.201	62.101	61.601	62.701	63.901	64.801	63.301	61.501	60.601	61.701	61.401	60.601	60.701	60.401	61.301	61.901	63.701	62.401	62.301	61.601	62.701	62.401	61.501	61.401	61.101	61.301	61.301	61.301	61.101	63.001	62.501	62.901
TTMV30-ctea38	59.501	63.301	62.001	62.001	60.501	59.301	59.601	59.701	59.701	61.301	59.501	60.101	59.901	59.901	60.901	60.601	62.901	61.701	63.101	61.301	61.401	62.301	62.901	61.801	61.101	60.601	60.901	61.101	60.101	63.001	63.901	61.801	61.301	61.201	62.701	60.001	61.501	61.901	62.201	59.401	60.901	61.401	61.801	62.501	63.401	60.901	63.001	61.601	60.501
SP60-C7	61.701	59.901	61.901	62.201	62.201	60.201	62.101	61.501	61.101	61.001	61.301	62.001	60.001	60.601	63.301	61.701	62.801	61.301	63.501	59.101	61.301	65.101	60.901	61.701	60.801	62.001	61.301	59.201	61.501	59.001	59.401	61.701	60.301	60.901	60.001	61.001	61.001	60.701	61.101	60.601	62.701	62.101	62.801	61.801	63.101	63.401	63.601	63.001	60.901
SP29-C1	61.701	62.901	62.901	61.601	61.601	62.901	61.601	61.201	62.501	62.301	63.601	63.401	63.301	59.901	63.201	61.001	63.401	63.701	62.401	61.801	61.101	62.501	64.601	64.701	63.601	63.101	65.001	62.901	60.601	62.701	63.701	62.301	63.201	64.601	64.201	62.701	61.301	60.701	60.601	60.501	61.701	61.401	62.801	62.901	63.901	61.401	64.301	63.901	61.501
TTMV37-ctbg056	63.701	63.601	64.101	64.501	61.701	66.101	62.601	65.101	63.101	61.301	62.401	63.301	63.101	61.601	63.801	60.501	63.301	64.501	63.701	61.801	63.701	62.101	62.701	62.501	60.701	62.201	59.801	63.301	62.101	62.601	62.601	62.101	61.801	64.001	62.801	63.401	62.901	63.301	63.901	62.701	61.801	60.801	63.701	63.601	60.501	62.901	59.701	62.701	63.801
SP3-C14	59.501	62.501	60.801	61.601	61.201	61.101	61.701	61.501	60.201	61.601	62.901	60.201	63.201	61.401	62.401	62.801	60.401	60.901	61.001	61.601	61.901	61.001	64.201	63.701	62.701	61.101	62.401	62.301	62.201	62.701	62.401	62.101	63.001	59.501	62.101	61.301	59.001	59.301	59.501	60.501	61.501	62.601	61.601	62.601	61.701	61.901	61.001	61.501	58.501
SP51-C16	60.701	61.301	61.401	64.301	62.301	62.101	63.701	61.901	62.401	63.101	63.201	62.801	62.501	62.301	61.301	59.801	62.201	61.201	62.901	61.001	63.101	61.901	62.601	62.301	60.701	61.701	63.101	61.401	61.401	60.901	61.001	61.101	62.101	61.301	63.401	61.901	61.201	60.501	61.001	62.101	61.701	61.201	60.701	61.601	60.201	61.401	61.701	58.901	62.701
SP6-C5	62.001	61.701	61.901	63.601	61.101	61.401	63.101	63.701	62.801	63.501	63.101	62.401	63.401	62.201	62.101	62.101	61.701	61.701	63.501	61.901	61.001	64.401	62.501	63.101	62.701	62.501	61.001	60.601	61.701	62.301	60.901	63.201	62.001	63.501	63.801	62.401	62.901	62.201	60.001	61.101	61.801	63.201	61.901	62.001	61.901	62.201	63.501	63.401	60.701
P7-c12	62.801	61.501	61.301	61.701	63.401	61.901	60.401	63.201	62.701	61.001	62.601	64.001	61.101	62.401	61.501	60.401	62.201	61.001	60.401	62.901	61.101	59.501	60.801	61.901	60.001	59.701	62.501	61.201	61.301	63.201	62.401	61.701	60.501	61.601	62.001	62.301	61.201	59.801	61.201	63.101	64.101	62.001	62.701	60.801	61.101	60.401	62.701	61.501	62.601
TTMV36-KS025	62.501	63.501	59.401	60.701	61.901	62.401	61.601	64.101	62.801	63.101	62.801	64.101	62.401	62.501	64.501	62.501	63.101	62.601	63.001	62.001	62.301	62.501	62.101	61.101	61.601	64.401	63.101	61.901	60.001	63.701	62.301	62.401	61.301	62.601	64.201	62.601	61.801	60.201	61.101	62.501	61.201	63.301	63.401	64.501	63.501	63.001	63.301	64.301	63.101
SP22-C4	62.401	61.601	63.201	62.101	63.601	63.601	62.101	64.201	62.001	62.301	61.901	64.401	61.101	62.501	62.501	61.901	63.501	62.101	61.601	63.901	62.901	62.001	62.201	62.001	60.501	62.301	61.201	63.101	62.101	60.801	61.801	59.601	59.501	61.701	61.701	60.801	60.601	60.601	62.001	61.801	61.101	64.001	64.301	64.001	66.201	63.701	64.401	63.101	62.101
TTMV25-ctbd020	61.701	64.701	64.501	61.901	62.101	61.801	61.501	63.801	62.301	61.001	62.001	63.101	61.601	61.201	62.401	60.101	61.601	63.001	63.901	61.701	60.901	61.301	61.801	62.001	62.201	59.801	60.801	62.401	62.601	61.901	60.201	59.701	60.301	62.001	62.701	59.701	61.101	60.801	61.801	61.601	62.201	61.501	63.101	63.101	64.401	64.101	64.301	62.801	62.301
SP56-C3	62.001	62.101	59.501	62.201	60.201	61.101	61.001	61.601	62.701	61.001	62.501	62.801	63.501	61.501	60.401	60.001	62.401	61.001	63.401	60.101	61.401	60.601	61.101	62.301	60.301	61.901	61.501	61.201	61.201	62.501	61.701	61.401	63.301	61.101	61.501	62.001	59.801	59.501	60.901	62.601	61.401	61.101	62.201	60.301	61.301	61.501	61.501	62.501	60.801
SP59-C2	61.001	64.001	61.701	63.301	60.301	63.101	61.601	60.601	60.101	62.401	61.401	62.901	62.901	62.601	62.201	62.301	61.201	63.601	62.101	60.101	63.401	61.801	63.601	64.001	61.201	61.101	62.601	62.801	62.201	63.901	62.301	62.101	61.501	62.901	62.601	60.901	61.701	61.801	61.001	59.701	59.001	62.201	62.001	60.901	63.201	62.801	60.901	61.701	60.101
SP28-C1	60.201	60.601	62.101	63.501	61.801	61.801	62.101	63.101	63.201	61.801	62.001	62.401	62.901	62.101	64.301	61.201	63.101	63.401	61.001	61.101	61.401	62.301	64.001	62.001	63.101	61.501	61.001	61.901	61.601	61.601	62.201	59.901	62.401	62.101	62.601	64.001	60.901	61.601	60.801	61.701	60.801	62.401	61.701	63.101	62.301	61.601	64.901	61.701	60.801
SP20-C5	60.801	62.001	59.901	64.701	62.901	62.101	62.701	63.801	61.701	64.801	63.501	63.201	61.801	60.901	61.701	64.101	64.001	63.001	62.101	61.101	59.601	61.301	61.201	61.401	61.201	60.801	61.201	62.401	60.001	60.201	62.101	59.501	61.001	63.401	62.401	60.601	62.701	61.301	61.501	60.901	60.301	61.101	61.301	61.001	60.901	61.101	63.201	62.701	58.901
SP34-C1	61.501	61.101	60.201	64.101	62.401	63.201	63.201	62.901	61.901	63.001	63.301	63.601	61.801	61.701	62.501	63.101	63.001	60.301	62.501	61.001	60.601	62.901	59.601	60.601	60.401	60.701	60.101	62.601	62.601	61.001	61.701	61.601	62.401	62.301	62.601	61.401	63.001	61.301	61.401	60.501	59.701	61.101	60.301	60.301	60.301	61.201	62.301	62.101	60.301
SP28-C6	62.401	62.301	62.801	64.001	61.801	63.701	63.201	61.101	61.601	63.101	62.901	63.901	62.401	62.301	61.201	63.801	63.901	62.201	63.201	61.901	60.401	61.401	62.201	61.701	62.901	61.001	62.001	61.901	61.001	63.001	62.601	61.601	63.601	61.701	62.301	62.001	62.001	62.201	62.401	61.901	59.701	61.101	61.901	61.901	62.601	59.001	62.101	62.501	59.301
SP38-C2	62.201	61.701	61.301	63.201	62.101	63.001	61.601	62.101	60.601	62.601	63.201	63.501	62.001	60.301	60.801	63.201	62.501	61.901	62.401	61.401	63.501	61.801	61.301	62.401	62.001	62.301	59.401	61.701	61.801	61.201	62.801	61.301	61.901	62.701	61.501	61.401	61.701	61.601	61.601	61.001	60.301	62.101	61.001	62.201	61.601	61.301	63.101	60.201	60.501
TTMV38-ctbf014	62.001	62.401	62.601	64.701	62.501	63.101	63.001	63.201	61.701	63.001	64.101	63.401	62.801	61.501	61.601	63.101	63.501	60.301	61.601	59.901	59.801	62.201	63.001	62.401	63.901	61.101	61.801	62.301	61.401	63.301	62.001	62.001	62.701	61.401	62.201	62.901	61.601	62.501	62.301	62.401	60.701	60.901	63.301	63.501	63.601	63.301	65.101	62.401	61.301
SP43-C3	63.501	61.701	60.901	62.801	62.201	61.701	64.601	65.401	61.701	62.601	63.401	62.601	62.301	62.001	61.201	64.701	63.101	62.001	61.401	59.401	61.101	61.601	61.501	62.201	61.601	61.501	63.701	62.001	60.201	63.401	61.901	61.001	63.701	62.501	63.301	62.201	62.901	61.501	63.401	61.501	61.801	64.001	61.001	61.501	59.901	60.201	62.801	62.001	61.901
SP14-C3	62.001	60.001	60.901	62.901	62.101	60.701	60.801	61.801	61.401	62.201	62.301	62.101	60.801	61.801	61.601	61.201	61.401	61.501	63.401	60.201	60.801	62.301	61.201	59.601	59.301	62.001	61.801	61.801	61.801	63.601	63.201	62.501	61.901	62.801	61.701	60.901	62.501	60.301	62.101	59.401	60.401	60.301	61.501	61.001	62.401	62.201	62.501	62.001	61.101
TTMV11-LIL-y2	62.801	60.601	60.701	61.601	61.401	60.601	62.401	62.801	61.601	63.801	60.201	63.601	62.301	63.501	60.601	62.301	62.401	62.701	62.601	61.701	61.401	61.801	61.201	60.101	60.801	60.101	63.401	61.501	62.601	64.001	62.701	61.901	60.601	62.201	61.701	62.101	62.401	62.101	61.601	60.901	61.101	61.901	59.301	60.801	61.501	61.201	63.101	63.601	61.901
SP59-C3	63.501	63.501	59.801	62.401	62.701	62.201	63.801	61.901	61.301	61.801	63.001	62.501	62.301	62.801	61.501	61.701	62.601	62.401	63.801	60.101	61.201	64.701	61.901	61.401	60.101	60.701	61.701	61.601	60.101	60.401	63.801	62.501	64.201	64.001	63.301	64.501	61.401	62.501	63.401	64.701	62.501	61.701	61.701	62.001	61.001	63.101	63.401	61.901	62.401
SP14-C4	63.701	62.301	62.801	62.201	63.701	63.801	61.701	63.301	63.401	64.101	62.701	63.101	62.101	62.601	62.101	61.101	60.301	63.201	60.901	60.401	61.401	64.401	61.801	63.101	59.701	61.201	61.901	62.801	62.301	63.301	63.001	59.701	62.101	63.301	64.501	64.701	62.601	63.801	63.501	63.301	62.401	61.301	60.201	61.301	60.201	62.201	61.401	62.101	61.901
P7-c21	62.301	63.801	62.001	62.301	61.901	62.301	61.201	61.501	61.401	61.901	61.801	62.401	61.601	62.101	61.301	62.201	61.301	61.301	60.101	59.201	60.101	63.601	61.501	61.701	60.201	62.401	60.001	61.201	61.301	62.401	61.401	60.601	60.201	62.701	62.701	62.101	62.901	61.901	63.301	61.101	63.401	61.401	59.901	60.801	62.201	61.601	62.501	62.701	60.001
SP16-C10	62.701	62.301	62.501	62.101	62.601	62.401	63.101	63.301	61.401	61.901	62.701	62.001	62.001	62.401	61.401	60.301	61.001	61.301	59.901	61.201	62.001	62.101	62.001	63.301	60.501	60.401	61.601	62.501	60.401	62.401	62.001	59.401	60.701	63.401	63.501	63.101	61.401	61.701	62.401	62.601	59.901	61.301	59.801	59.601	60.001	61.301	61.601	60.601	62.301
SP40-C4	61.701	61.301	62.101	61.801	62.001	65.101	63.901	62.401	60.001	65.301	62.201	63.001	61.101	63.001	61.201	61.501	62.501	61.501	64.201	61.501	63.701	61.001	61.601	60.701	60.301	59.701	62.801	60.101	61.701	63.001	62.901	61.801	60.201	61.001	62.401	62.501	61.001	61.201	61.601	61.801	60.201	62.301	60.501	60.801	60.901	62.301	63.801	61.401	62.201
P1-c16	62.301	63.701	63.301	64.501	64.101	61.501	64.201	63.501	64.301	64.001	63.701	65.101	60.601	60.701	63.101	63.701	62.301	64.201	63.701	62.001	63.801	63.001	61.801	62.501	59.401	61.901	61.801	61.401	61.601	65.001	63.701	61.801	65.001	63.001	62.701	62.801	62.201	61.501	62.501	64.501	60.901	63.801	62.001	62.301	62.501	63.001	63.301	62.301	63.701
SP16-C19	62.401	63.301	61.301	65.401	63.901	60.201	62.401	62.901	62.001	63.301	63.201	64.101	62.401	60.901	61.601	61.801	62.901	62.601	63.301	62.801	62.201	63.401	62.301	61.901	60.801	61.701	60.701	63.301	61.501	63.001	64.001	61.901	62.901	64.601	63.901	62.601	60.701	60.801	62.601	61.101	61.001	64.601	61.201	61.301	61.501	61.501	62.701	60.901	62.101
SP21-C3	63.001	62.801	62.801	63.701	63.301	61.301	62.501	63.301	64.401	62.201	61.001	63.101	62.401	61.001	62.601	63.501	62.101	62.701	63.801	60.501	62.601	63.801	60.501	60.501	60.601	59.801	60.201	60.901	62.301	62.201	62.101	62.001	61.301	62.901	62.401	62.601	60.401	60.501	61.701	61.601	62.001	62.101	61.601	60.901	61.501	61.801	62.701	60.401	62.001
SP37-C5	62.201	62.001	61.101	60.001	62.101	62.501	62.901	62.701	60.001	61.801	62.401	63.801	63.601	61.601	62.801	63.001	61.401	64.001	60.401	60.001	62.701	61.001	61.101	61.501	59.801	61.401	61.201	61.401	59.501	61.901	62.701	61.001	62.101	61.501	61.101	61.901	61.701	61.401	60.901	61.101	60.801	62.501	61.401	61.101	62.401	59.801	61.501	60.501	59.801
TTMV10-LIL-y1	62.901	62.701	62.401	62.401	63.001	62.801	62.301	63.501	60.601	61.201	63.801	63.401	62.901	62.801	61.201	62.401	61.601	63.801	63.401	62.401	62.101	61.201	62.601	61.801	61.001	63.101	61.001	61.001	62.401	63.001	62.401	62.601	63.101	60.801	62.501	63.601	61.801	61.301	61.501	60.201	62.201	64.601	60.901	60.701	62.401	60.301	61.201	62.501	60.501
Cpz2Cl2	64.301	63.001	61.101	60.501	61.201	62.201	62.001	62.601	60.801	63.001	63.401	63.001	63.701	61.301	61.501	63.301	62.501	61.101	63.701	62.801	63.701	62.801	61.701	60.801	61.801	61.601	60.401	61.601	63.401	63.301	64.101	61.401	62.601	61.301	61.901	61.001	61.001	61.401	62.101	61.501	62.101	62.601	60.601	59.901	61.101	61.501	62.201	60.801	62.401
SP43-C9	62.401	61.601	62.301	62.001	61.501	62.901	61.301	62.701	61.201	64.901	61.801	63.901	62.101	60.201	62.901	62.401	62.601	64.101	62.201	59.101	61.401	61.601	61.001	60.001	61.201	61.701	61.501	62.501	61.201	63.501	63.001	63.301	61.601	61.401	64.001	61.101	60.201	62.001	62.401	62.901	61.501	62.001	61.001	61.001	61.601	60.601	62.201	61.501	60.801
P10-c9	61.401	61.101	62.301	60.801	61.401	62.901	62.201	63.701	61.201	64.701	62.301	64.301	64.101	61.701	61.001	61.201	62.801	63.301	61.301	59.101	62.201	63.001	64.301	63.901	62.501	60.601	62.001	62.301	61.301	61.701	62.801	62.501	62.101	62.601	62.101	61.401	62.101	61.901	61.701	62.401	60.901	61.801	62.201	61.001	61.201	61.001	62.101	61.601	59.401
SP15-C4	62.401	62.301	63.801	63.001	63.501	64.201	61.801	62.701	58.901	63.401	64.201	62.801	63.101	63.701	62.601	61.901	63.801	63.401	63.601	58.601	61.401	61.501	60.901	61.701	61.801	61.201	60.901	59.501	60.801	62.101	60.701	62.401	62.901	61.601	63.001	62.301	61.001	59.901	61.301	62.201	59.101	61.701	61.201	61.601	62.501	62.001	63.301	61.301	60.701
SP52-C3	62.401	62.101	61.601	62.301	60.401	62.001	63.301	61.601	60.401	62.401	61.401	62.801	62.401	62.201	60.901	62.601	62.901	60.901	61.901	60.301	61.101	62.701	61.801	60.601	59.601	60.001	60.701	61.101	61.601	61.101	61.801	60.901	60.801	63.001	62.801	59.501	60.201	60.101	60.701	62.201	60.201	61.601	60.201	60.501	60.501	61.501	62.901	62.801	59.701
SP19-C1	63.701	65.001	61.901	61.701	62.101	61.001	61.101	62.601	62.201	64.301	61.901	63.301	63.101	60.701	62.401	61.501	62.401	63.101	61.201	59.801	62.501	63.201	62.501	62.601	60.401	62.701	61.501	59.801	60.601	64.701	62.901	60.301	61.401	61.901	61.401	60.401	64.001	61.701	62.101	63.201	60.901	61.001	60.501	61.001	62.701	60.901	62.801	61.601	61.201
SP31-C4	63.101	63.801	63.701	63.901	63.301	62.701	63.201	62.501	62.301	63.901	64.101	65.001	64.301	63.701	64.001	61.401	62.901	63.001	63.401	62.801	61.201	61.801	62.101	63.201	61.901	62.801	61.801	63.501	63.101	64.901	64.401	63.601	64.101	63.201	62.901	61.501	63.001	63.601	62.301	61.801	61.501	62.901	61.201	62.001	61.001	61.001	63.501	62.701	62.201
TTMV35-ctei055	65.401	62.701	64.801	63.601	63.201	63.701	61.201	62.901	61.101	65.701	62.601	64.501	64.501	63.001	63.701	61.901	63.501	64.101	61.401	61.601	64.701	60.001	62.301	61.001	61.501	62.901	60.801	64.101	64.001	64.101	63.101	62.601	62.301	62.501	63.801	61.501	63.801	62.701	64.101	63.501	62.301	62.301	62.601	63.401	61.001	63.401	62.201	62.301	60.601
[truncated: 114 more columns]
