# Supplementary material for: Exploring the Diversity of the Human Blood Virome
Source: Viruses. 2021 Nov 21;13(11):2322. doi: 10.3390/v13112322 (PMC8621239; doi:10.3390/v13112322)
Supplement: Supplementary file 1 [file viruses-13-02322-s001.zip › Supplementary_Table_S13.xlsx]

## Sheet: Hoja1
Supplementary Table S11. Pairwise nucleotide identity matrix obtained using ORF1 from TTMDV sequences belonging to reference species, potential novel species from our previous study [18], and sequences described in the present study.
	SP10-C4	SP46-C4	SP13-C2	SP45-C8	SP49-C2	P7-c18	SP51-C25	TTMDV11-MDJN47	SP7-C10	TTMDV9-MDJN2	SP26-C2	P1c-23	SP8-C3	TTMDV14-MDJN97	SP56-C7	SP37-C7	SP28-C5	SP31-C6	TTMDV7-MDJHem3-2	SP43-C12	P12-c3	SP30-C10	SP51-C27	SP51-C15	TTMDV12-MDJN51	SP48-C5	SP58-C3	SP8-C1	SP25-C4	P3-c5	SP19-C2	TTMDV3-2PoSMA	TTMDV4-6PoSMA	SP1-C1	P7-c24	SP25-C3	SP45-C5	SP51-C22	TTMDV2-MD2-013	TTMDV13-MDJN69	SP48-C6	SP55-C2	TTMDV1-MD1-032	SP18-C4	SP30-C9	SP47-C4	SP43-C10	SP22-C2	SP22-C8
SP10-C4	100.001
SP46-C4	90.501	100.001
SP13-C2	70.801	72.201	100.001
SP45-C8	72.001	72.101	84.401	100.001
SP49-C2	71.801	72.601	73.701	73.601	100.001
P7-c18	73.301	73.801	72.201	72.001	74.201	100.001
SP51-C25	68.001	67.901	65.601	66.401	64.801	65.301	100.001
TTMDV11-MDJN47	68.601	67.901	68.301	68.201	67.201	66.401	71.701	100.001
SP7-C10	66.601	67.001	68.501	65.701	65.201	67.201	66.301	67.501	100.001
TTMDV9-MDJN2	66.301	66.201	64.901	65.001	66.401	66.801	63.801	65.901	66.601	100.001
SP26-C2	60.401	62.201	61.901	64.001	62.701	63.201	62.801	62.801	63.401	63.401	100.001
P1c-23	63.701	64.601	63.801	64.401	63.801	64.001	64.701	63.601	64.201	63.701	67.801	100.001
SP8-C3	66.301	65.701	63.401	65.701	66.301	65.501	62.901	64.001	66.101	63.001	63.901	61.801	100.001
TTMDV14-MDJN97	63.801	64.601	62.501	63.501	65.601	64.601	61.701	62.301	65.001	62.001	61.601	62.501	90.401	100.001
SP56-C7	64.101	64.201	62.601	63.901	64.501	63.501	62.401	63.401	64.201	63.501	61.601	62.801	69.201	69.501	100.001
SP37-C7	63.001	63.701	63.101	62.701	62.001	62.801	63.101	62.501	64.201	63.601	62.301	61.601	69.001	68.301	69.201	100.001
SP28-C5	63.301	64.201	63.901	62.001	63.101	65.001	61.501	63.401	64.201	61.901	62.001	62.001	68.301	68.501	69.201	68.001	100.001
SP31-C6	63.701	66.401	64.001	63.401	64.201	63.201	63.601	64.201	64.801	63.301	63.101	63.901	67.901	68.701	68.601	66.401	67.701	100.001
TTMDV7-MDJHem3-2	64.001	63.301	64.201	63.901	63.501	64.701	62.901	64.801	63.401	64.701	62.301	63.901	65.801	64.801	65.401	68.401	66.901	66.901	100.001
SP43-C12	63.901	63.101	61.301	63.801	61.901	63.001	63.101	61.801	61.801	62.501	62.001	61.701	66.801	66.901	63.801	64.901	64.701	65.401	64.401	100.001
P12-c3	63.501	62.101	60.501	63.001	60.301	63.101	64.601	61.001	62.701	62.701	62.701	61.301	66.501	66.201	63.301	65.501	65.301	65.301	65.801	96.701	100.001
SP30-C10	62.301	63.501	65.701	64.501	63.701	63.801	62.601	63.101	64.901	61.201	62.601	60.801	66.501	64.901	66.201	64.401	65.801	64.601	63.501	67.601	67.601	100.001
SP51-C27	62.201	63.401	64.301	64.201	62.801	62.501	62.301	64.001	65.101	60.901	62.601	61.101	66.001	65.301	65.301	65.101	65.401	66.201	63.001	67.201	67.801	95.801	100.001
SP51-C15	63.701	64.701	61.101	61.201	62.701	63.401	62.001	62.901	64.701	61.501	60.701	62.201	65.501	64.301	64.701	64.501	66.101	64.401	64.201	67.001	67.201	75.801	75.401	100.001
TTMDV12-MDJN51	63.701	63.401	62.701	61.601	60.701	62.001	62.001	63.001	64.401	63.201	62.901	61.601	65.101	64.401	64.501	65.001	65.801	66.201	65.301	66.801	66.301	75.901	76.001	81.201	100.001
SP48-C5	63.501	64.901	64.201	64.901	64.101	64.501	64.401	63.901	65.301	63.501	63.701	63.301	66.401	64.801	65.701	64.501	67.001	63.501	64.601	65.301	65.801	66.901	66.901	66.401	67.001	100.001
SP58-C3	63.601	63.401	62.901	65.701	64.201	63.201	63.501	65.201	61.501	62.701	61.601	61.501	64.901	64.001	63.601	63.801	64.501	63.301	64.401	65.301	65.101	64.901	65.201	65.101	64.801	65.001	100.001
SP8-C1	65.301	66.201	64.401	65.301	65.701	64.901	62.401	64.001	63.501	63.601	63.901	62.201	67.101	67.801	65.501	66.901	66.001	66.101	63.901	64.301	63.901	65.601	65.301	63.801	66.301	66.501	64.401	100.001
SP25-C4	63.301	63.101	64.601	65.501	65.001	63.901	64.201	63.501	63.601	63.501	62.901	64.101	66.201	66.001	63.101	63.501	66.201	63.901	64.801	64.501	64.801	65.101	64.001	64.401	64.701	67.101	64.901	68.501	100.001
P3-c5	63.401	65.201	63.901	63.501	64.801	65.001	64.001	64.001	64.401	64.901	63.401	65.401	67.601	66.101	65.501	66.601	64.901	64.401	65.401	64.301	64.601	64.101	64.301	65.201	64.101	67.701	64.501	68.701	67.401	100.001
SP19-C2	66.701	66.301	65.101	64.101	68.301	67.701	65.201	63.201	63.501	64.101	63.301	64.001	67.201	65.701	66.701	66.201	65.301	66.901	65.901	64.301	64.901	63.801	64.301	65.801	65.201	66.601	65.101	68.301	67.301	67.301	100.001
TTMDV3-2PoSMA	65.101	63.901	62.001	62.401	65.501	63.701	62.501	62.901	63.301	63.301	63.401	63.301	63.901	61.801	62.701	63.401	63.801	64.101	65.401	63.401	62.001	62.101	62.401	63.301	64.301	64.201	65.401	67.501	65.101	64.801	67.401	100.001
TTMDV4-6PoSMA	63.701	61.301	63.101	61.701	62.601	63.401	62.601	64.601	63.301	62.201	63.101	64.001	65.301	63.901	62.801	65.801	65.501	64.201	62.801	62.801	63.201	65.201	64.801	64.101	63.301	64.901	64.001	67.001	65.101	66.201	66.501	66.501	100.001
SP1-C1	63.101	63.401	62.601	64.301	62.501	63.901	63.601	63.101	63.601	63.701	62.301	63.001	64.701	63.701	62.201	62.701	65.101	63.601	63.301	62.601	62.601	62.601	63.301	63.801	62.201	64.401	64.601	63.901	65.401	66.201	66.001	66.001	63.001	100.001
P7-c24	61.401	62.501	63.601	63.201	63.301	64.001	63.601	63.301	63.801	63.201	62.801	62.701	64.101	63.701	62.501	63.701	65.801	64.401	62.501	62.701	62.601	62.401	63.301	63.901	61.501	64.401	63.601	64.501	65.001	67.001	64.701	65.001	62.801	96.001	100.001
SP25-C3	64.601	64.701	64.201	63.501	64.401	62.901	63.201	63.101	65.401	64.301	62.301	63.101	66.901	66.101	65.501	64.101	66.001	65.001	64.901	64.001	64.601	65.801	65.701	66.001	65.701	66.901	64.701	67.401	67.301	67.501	66.901	64.201	64.801	70.001	69.401	100.001
SP45-C5	62.201	64.201	62.001	62.401	62.801	62.701	62.401	61.901	64.501	64.101	61.101	64.101	64.701	64.401	65.501	63.101	62.901	61.501	63.301	63.101	63.801	65.101	64.201	62.401	63.301	65.401	63.601	65.901	65.101	65.001	65.201	63.301	63.901	65.001	64.801	67.801	100.001
SP51-C22	61.801	64.301	63.301	63.401	63.901	62.701	62.201	61.801	63.701	64.801	62.101	64.501	64.501	64.201	65.501	63.301	63.101	61.901	63.401	64.001	64.001	65.301	64.901	62.701	64.101	65.201	63.001	65.101	64.401	64.801	64.801	63.701	63.801	65.001	65.401	67.301	96.101	100.001
TTMDV2-MD2-013	66.601	65.301	64.201	63.801	64.801	65.401	63.301	64.701	63.601	63.501	62.901	64.501	65.701	65.101	65.201	65.601	65.501	66.001	63.401	64.201	63.601	64.501	64.201	63.901	66.101	64.501	63.701	67.501	65.201	65.701	66.401	62.701	64.201	64.901	65.801	67.901	70.301	70.501	100.001
TTMDV13-MDJN69	64.501	64.601	63.001	64.401	63.201	61.801	61.601	63.501	61.901	62.701	63.101	64.101	64.501	64.201	63.901	63.101	64.701	62.201	63.401	63.901	64.701	63.801	62.401	63.901	62.901	64.001	63.501	65.401	64.601	65.701	65.701	65.001	63.501	63.601	64.101	65.801	69.101	69.201	66.601	100.001
SP48-C6	63.501	63.301	63.001	62.001	62.401	63.901	63.201	64.001	64.901	63.401	63.901	61.601	63.401	62.001	63.001	62.001	62.801	64.701	64.901	63.701	63.101	63.401	62.701	63.801	62.301	64.201	63.301	63.501	63.301	64.001	64.301	66.501	63.101	64.101	65.101	64.701	64.701	63.801	64.101	62.901	100.001
SP55-C2	61.701	63.701	62.901	62.001	64.301	63.701	62.801	60.301	65.001	61.601	63.601	62.301	64.001	65.001	64.001	63.701	64.001	64.001	64.101	62.401	63.001	63.801	63.401	63.401	64.401	61.701	63.201	65.101	63.401	63.801	63.601	62.701	63.501	63.701	64.201	62.901	62.901	61.901	66.601	62.801	72.001	100.001
TTMDV1-MD1-032	64.301	64.401	64.101	61.501	64.301	65.001	63.301	62.401	64.201	63.101	64.001	62.701	65.201	64.101	63.101	63.801	63.301	64.501	63.601	65.001	64.401	63.601	63.401	64.701	62.201	65.901	65.801	64.501	66.801	64.801	67.501	67.301	64.001	66.201	67.101	66.701	64.701	65.101	66.001	64.301	72.901	75.001	100.001
SP18-C4	63.401	63.201	66.301	65.001	65.401	63.601	63.201	63.001	64.601	63.401	63.201	62.201	64.301	63.601	62.801	63.801	64.001	64.201	64.001	64.101	64.401	62.501	62.801	64.001	63.701	63.201	62.501	61.701	62.501	65.901	65.501	62.901	62.801	64.601	64.701	62.701	64.601	63.301	64.601	64.101	65.701	64.201	62.801	100.001
SP30-C9	64.501	65.001	65.901	65.101	66.501	66.201	63.801	63.101	64.701	64.101	63.701	63.401	63.501	64.101	63.201	64.301	63.601	64.901	64.901	61.801	64.601	62.901	63.101	63.601	63.701	63.101	63.501	64.301	63.301	66.401	66.801	62.501	63.701	65.801	64.901	62.901	64.601	64.301	64.101	65.301	65.701	63.401	65.501	95.601	100.001
SP47-C4	64.901	66.101	67.101	65.701	66.301	65.201	64.101	63.201	64.601	63.301	63.601	63.401	64.801	64.801	62.701	64.001	64.501	65.001	64.601	63.601	63.701	62.001	62.301	64.101	64.801	63.501	63.501	65.001	63.801	66.301	66.201	63.301	63.401	66.201	65.301	63.701	65.001	64.001	65.101	65.301	66.901	64.601	64.801	95.801	96.201	100.001
SP43-C10	66.401	65.701	66.201	64.901	65.401	65.201	63.901	63.901	64.401	63.601	63.501	64.101	65.201	65.801	63.101	64.001	64.401	65.101	64.601	63.001	63.501	62.701	62.601	64.901	64.001	63.401	62.701	64.301	63.601	66.301	67.101	63.901	62.801	65.301	64.901	64.101	64.701	63.301	64.401	64.901	65.601	63.601	64.101	95.201	95.401	95.401	100.001
SP22-C2	65.601	66.101	66.201	65.401	66.001	64.901	63.201	63.901	66.201	63.101	64.401	64.701	64.401	64.601	64.901	64.101	64.601	65.601	65.301	63.401	63.401	63.901	63.701	66.101	66.301	62.901	63.901	64.401	64.701	67.501	66.001	64.401	64.701	65.601	65.301	65.301	64.001	63.701	64.701	65.301	66.701	64.001	66.401	81.001	82.601	82.701	82.501	100.001
SP22-C8	66.001	66.101	64.501	64.601	65.601	65.201	64.201	62.701	65.301	64.601	65.401	64.601	62.001	63.401	64.601	64.501	64.601	65.801	63.701	64.301	64.801	63.801	63.501	65.101	65.801	64.901	63.801	65.901	66.201	68.301	67.101	64.801	63.101	63.701	63.901	67.401	65.101	63.501	64.301	63.401	66.901	64.601	66.201	76.201	76.501	77.201	77.501	78.901	100.001
TTMDV8-MDJN1	65.801	64.601	64.401	63.701	65.401	64.201	62.401	63.101	64.301	62.901	64.101	64.901	64.201	65.101	63.601	63.201	63.601	65.001	63.601	64.301	64.301	63.201	63.701	65.001	63.501	64.201	64.601	65.301	64.701	66.001	65.201	63.501	62.601	65.501	65.701	63.401	63.601	63.501	63.801	63.601	64.301	63.701	65.101	76.501	75.801	76.401	76.101	78.501	78.601
SP45-C7	65.601	65.101	63.501	64.601	66.401	64.101	63.901	64.501	63.701	64.401	64.201	65.301	64.601	63.901	65.401	65.701	63.201	64.601	64.601	63.201	63.601	63.601	62.901	66.001	64.201	64.101	64.401	65.101	63.401	65.501	65.901	65.501	65.501	63.101	64.301	65.101	62.501	63.301	63.301	65.501	64.701	62.401	66.201	71.401	71.901	71.501	72.001	73.101	71.801
SP47-C9	63.601	63.801	61.701	60.701	62.201	63.401	64.201	63.201	64.501	63.101	63.801	64.501	64.401	64.501	65.901	63.901	65.201	63.101	63.501	62.301	62.101	63.201	64.101	64.101	65.601	64.901	64.301	63.301	64.201	66.101	66.401	64.501	63.201	64.701	64.401	66.301	63.601	62.401	62.701	65.401	64.801	63.401	66.401	69.301	69.701	69.801	69.801	71.201	70.701
SP46-C3	63.301	64.301	64.801	64.301	63.901	63.001	65.201	62.801	64.801	63.701	64.301	63.901	67.201	66.401	65.601	65.001	63.901	63.601	63.301	63.601	63.501	62.401	62.001	63.301	65.401	64.101	64.001	65.301	65.301	66.001	66.301	64.301	65.401	63.901	64.501	67.201	64.301	64.701	65.001	64.201	65.101	63.201	67.101	68.401	68.801	68.501	69.101	70.401	69.501
P9-c5	64.901	65.601	62.901	63.901	63.601	63.901	65.001	64.301	64.201	62.401	64.901	62.501	66.501	66.001	64.601	64.401	65.501	64.701	64.501	62.601	62.601	62.801	63.601	63.701	63.801	65.001	64.401	64.201	64.901	64.501	65.401	65.301	64.101	65.501	65.301	67.101	64.801	63.101	64.701	64.501	63.901	63.701	65.901	69.501	69.801	70.001	69.201	68.301	69.101
SP51-C23	63.201	64.201	62.801	63.501	61.701	63.801	63.401	63.801	64.801	63.401	62.901	62.901	65.601	66.101	64.501	64.401	63.301	64.601	62.901	63.201	63.901	63.901	65.101	62.501	63.001	64.001	65.301	63.101	65.701	65.101	64.901	62.901	63.901	61.101	61.401	64.701	63.801	64.901	64.901	62.801	64.901	62.901	64.901	67.801	66.701	67.701	67.201	66.401	66.201
SP37-C4	64.801	65.601	63.401	61.901	64.901	63.901	63.201	65.101	65.001	62.201	63.801	62.701	64.301	65.501	64.501	64.001	64.201	63.401	63.201	62.101	62.501	63.801	63.201	64.601	63.001	64.201	64.701	65.001	64.001	67.201	65.701	66.701	62.601	65.501	65.201	66.901	63.401	64.401	64.001	64.601	66.301	64.201	65.701	67.001	68.001	67.501	67.301	69.301	67.701
SP1-C3	62.001	62.101	62.401	63.401	63.101	62.601	64.101	61.701	64.901	61.801	62.601	62.401	64.201	64.201	64.701	64.601	64.001	64.201	62.801	62.101	61.101	62.601	62.601	61.501	61.401	64.201	62.601	65.701	65.201	64.101	64.901	63.201	64.201	64.701	65.301	64.201	64.801	64.201	64.001	63.501	64.001	64.501	64.201	64.601	64.501	65.101	65.801	64.701	66.501
TTMDV6-MDJHem3-1	63.901	64.901	63.801	65.001	64.901	65.201	62.701	62.901	62.601	62.701	64.301	63.801	65.301	65.101	66.201	64.301	62.301	61.901	63.901	61.901	62.401	62.401	61.801	60.601	62.201	64.701	61.401	64.001	65.601	65.601	63.801	63.301	63.901	64.901	64.101	64.901	65.201	64.501	65.401	64.001	64.601	63.701	66.901	65.501	65.301	65.501	65.901	65.801	65.801
SP30-C8	62.201	63.101	63.901	64.401	63.801	64.201	63.101	63.301	65.601	62.101	63.001	63.701	65.501	64.801	65.001	62.401	62.801	63.001	64.101	63.001	63.901	63.001	62.101	61.701	64.301	62.701	64.501	64.301	64.501	64.301	64.201	65.101	63.401	63.401	63.601	64.601	65.301	64.701	63.901	64.601	64.701	62.101	65.501	63.801	65.001	64.801	65.801	65.601	65.401
SP51-C26	64.301	63.101	63.601	63.401	62.701	66.101	65.001	64.301	65.301	62.701	62.801	62.801	63.801	63.901	62.101	62.701	62.701	63.701	64.001	64.301	63.101	62.501	60.901	60.601	62.901	62.801	64.601	64.501	64.101	64.101	65.801	62.601	63.301	62.301	61.901	63.601	63.201	63.401	65.001	63.101	62.501	61.301	62.701	63.901	64.501	65.101	64.501	65.301	66.501
SP3-C15	63.401	63.601	61.901	63.101	63.201	63.601	64.401	63.601	64.701	63.401	61.101	63.301	66.001	65.701	64.301	63.701	64.401	63.101	65.501	64.201	64.301	63.101	63.001	63.701	64.001	64.301	65.601	66.401	65.501	67.001	65.201	65.401	64.301	65.001	64.901	64.601	65.001	65.201	64.401	64.001	63.701	64.401	63.801	65.401	65.501	64.701	65.801	65.401	65.201
TTMDV10-MDJN14	63.501	64.401	64.101	63.401	64.101	63.701	64.101	61.801	63.801	62.301	62.501	63.001	64.401	62.201	63.501	63.801	64.001	62.801	61.701	63.601	62.801	62.201	62.401	62.901	62.901	62.901	63.901	63.501	63.601	65.301	64.701	63.901	63.101	63.901	64.101	62.201	63.901	64.901	64.001	62.001	64.601	62.101	64.401	63.101	64.501	63.501	64.001	64.501	63.801
SP28-C7	60.301	62.601	60.001	61.401	64.101	62.001	64.901	64.201	62.101	61.801	62.801	61.601	64.101	63.401	62.401	64.201	64.401	65.101	63.701	64.301	64.401	63.201	63.901	64.201	63.301	63.801	61.901	63.801	62.701	63.601	64.101	62.501	62.401	61.601	61.501	63.201	61.701	61.801	63.401	64.101	64.301	65.001	65.901	63.801	64.201	64.401	64.201	65.101	64.701
SP48-C8	61.401	62.701	61.701	61.501	62.801	62.301	64.901	65.401	62.201	62.301	63.201	63.301	64.801	63.401	62.801	64.301	63.401	64.501	63.901	64.701	64.901	63.801	64.201	65.001	64.201	63.401	61.601	64.401	64.701	63.501	64.601	62.501	63.101	62.501	62.501	63.501	63.301	62.601	63.701	65.001	64.701	64.801	65.301	63.701	64.601	64.901	64.001	66.101	65.301
SP60-C6	62.001	64.701	61.201	61.401	61.401	62.501	63.001	63.401	62.201	63.401	65.301	62.101	64.101	63.301	62.201	64.201	64.101	62.901	63.801	66.301	65.501	65.701	65.801	65.201	64.401	63.901	63.801	64.201	65.401	64.801	65.301	64.501	63.101	60.601	61.201	63.501	63.201	62.701	63.401	63.901	66.101	64.101	64.701	64.701	66.501	65.901	65.501	66.301	66.901
SP47-C10	61.401	62.601	63.901	63.701	63.901	63.301	63.301	64.001	63.901	64.001	63.001	62.601	65.001	63.401	64.801	63.801	65.201	64.801	65.101	65.201	65.601	64.201	64.601	65.201	64.501	66.401	63.701	64.401	63.301	66.701	67.901	64.501	63.301	65.001	64.601	65.301	67.201	67.801	65.501	63.601	64.601	63.701	65.601	66.001	66.001	65.701	65.801	66.001	65.701
SP31-C5	62.501	63.401	64.201	62.401	62.101	63.301	62.501	65.001	63.801	63.201	62.101	62.001	65.301	63.501	64.001	64.801	62.601	64.601	62.801	63.801	63.201	64.501	63.801	65.901	65.101	63.901	63.401	65.701	63.901	64.701	65.101	64.101	63.201	64.001	63.801	68.001	63.501	64.301	64.301	63.001	64.801	64.101	65.901	64.101	63.601	65.501	64.101	66.501	66.501
SP30-C3	62.501	62.401	62.901	62.901	63.301	61.201	64.201	63.901	61.701	64.601	64.001	63.701	65.201	64.901	64.101	63.301	64.801	64.401	62.801	62.501	62.701	61.501	62.501	62.801	63.801	63.801	64.401	62.601	65.401	65.201	65.701	63.401	63.301	65.101	64.001	65.301	63.901	63.601	64.401	63.001	64.601	63.901	65.001	65.001	64.301	64.901	65.201	66.601	65.001
SP7-C6	61.601	64.301	63.801	62.201	63.301	63.201	63.601	64.701	61.401	64.301	64.201	64.801	64.601	65.201	65.701	62.601	64.701	62.201	64.501	64.101	63.901	64.701	64.801	63.101	63.801	63.601	64.201	66.601	66.301	64.201	66.701	64.601	63.901	66.101	66.601	63.701	63.301	63.001	64.501	64.101	63.901	63.401	65.501	64.101	64.801	64.001	63.301	63.801	66.101
P1-c19	63.901	64.101	63.401	62.901	62.901	62.401	64.301	64.901	62.301	63.001	64.401	64.401	66.401	64.901	64.901	64.001	63.701	64.301	65.501	63.001	64.001	64.301	64.301	64.301	63.501	64.201	63.501	63.901	65.701	65.801	66.201	64.801	63.701	63.401	64.301	63.701	63.701	63.901	65.601	65.601	63.501	61.401	64.201	63.801	64.001	64.101	65.301	64.801	64.901
SP51-C13	64.201	63.901	63.401	64.001	63.501	63.101	62.901	64.301	64.001	63.201	64.501	64.001	65.201	65.401	67.001	64.801	63.101	65.001	64.501	64.601	64.601	63.701	63.201	63.001	63.401	66.301	65.001	64.401	65.801	65.401	65.401	65.001	62.801	64.301	63.701	64.901	64.701	64.001	66.001	64.101	65.701	65.501	66.301	65.601	66.901	67.901	67.101	67.501	66.801
P7-c3	63.001	64.001	63.101	64.201	63.301	62.201	63.501	64.201	62.401	64.101	63.801	61.901	62.901	64.701	65.601	63.201	62.901	63.601	64.401	65.201	64.801	62.401	64.201	63.001	64.101	63.901	65.301	63.501	64.201	65.201	63.301	63.701	64.201	61.801	61.701	64.501	61.901	62.201	62.301	63.401	66.101	63.301	65.601	64.801	64.301	64.201	65.501	65.201	64.301
SP36-C5	65.101	64.501	63.801	64.801	64.201	64.101	64.901	64.601	61.401	63.801	63.901	65.001	64.701	63.501	63.901	64.801	64.001	63.101	65.101	62.301	62.201	65.101	65.201	62.801	63.101	65.301	65.201	63.401	62.701	65.901	65.001	66.401	64.001	63.701	63.801	63.301	63.701	63.101	62.801	63.601	63.801	62.801	63.001	63.801	65.001	66.201	65.201	65.001	65.801
TTMDV5-MDJHem2	65.601	65.401	63.701	65.301	64.801	64.601	64.301	63.301	64.701	64.701	64.601	64.201	63.601	63.001	63.901	62.601	63.201	62.801	63.201	63.901	63.201	64.301	63.701	65.001	63.701	63.701	63.201	63.901	64.101	64.801	66.301	64.601	63.401	62.701	62.501	64.501	62.901	62.001	63.401	63.301	65.701	64.201	65.601	65.701	66.301	65.701	66.401	65.801	65.501
SP43-C11	61.201	61.201	61.901	61.301	63.101	60.401	63.001	63.001	62.901	62.501	62.501	62.301	62.401	63.801	62.701	62.801	63.201	63.501	63.801	63.001	63.201	65.101	64.001	62.801	62.401	62.601	63.801	62.401	64.101	65.001	64.701	61.201	63.601	62.701	63.001	62.201	62.001	62.701	63.201	63.001	62.301	63.301	63.201	63.401	63.001	63.601	63.601	65.101	64.101
SP51-C21	62.001	62.501	61.501	61.401	62.101	63.501	62.401	63.201	63.101	62.501	63.601	62.201	63.301	63.801	62.801	63.001	64.101	63.801	64.401	60.701	61.001	63.401	63.001	62.101	62.401	62.001	62.601	63.501	63.101	64.801	64.601	61.201	64.301	63.301	62.501	62.701	62.801	63.401	63.901	62.401	63.001	63.601	63.401	63.401	62.601	63.801	63.501	64.301	65.601
SP16-C14	62.201	62.101	62.901	63.801	59.701	62.801	61.601	62.901	62.501	63.901	63.701	61.101	66.101	65.801	61.201	62.501	63.801	63.801	62.801	63.101	62.601	64.301	64.901	65.101	64.001	62.901	63.301	61.701	63.301	62.701	63.901	63.301	62.601	63.401	62.601	63.501	62.401	62.601	62.701	63.501	64.201	64.101	65.701	63.501	63.801	64.601	64.301	63.901	63.701
SP7-C8	63.501	62.701	64.801	63.101	61.701	64.301	62.901	62.401	61.901	63.701	63.901	65.301	62.201	61.101	66.001	63.001	62.701	62.801	62.301	63.701	62.301	62.201	62.001	63.201	64.201	63.901	61.801	63.901	62.201	64.801	63.301	62.001	63.001	64.401	63.001	61.401	60.501	60.301	62.901	62.701	65.301	64.201	63.701	64.101	64.201	63.901	64.801	67.101	66.701
SP16-C6	62.101	63.401	61.401	62.901	61.101	64.401	62.601	62.901	63.701	63.401	62.801	64.501	64.301	63.701	63.701	64.301	63.001	62.601	64.201	63.101	64.001	62.801	62.601	63.101	64.001	63.301	62.801	62.901	63.601	66.301	65.101	63.201	62.301	63.001	62.501	64.101	63.901	63.401	63.101	63.701	65.201	63.201	65.801	66.101	66.101	67.001	66.301	67.201	65.901
SP25-C2	63.501	63.501	62.501	64.101	63.401	64.001	62.901	63.801	63.901	64.901	65.501	62.401	64.201	64.201	63.501	64.901	62.501	63.001	63.801	61.701	61.701	62.601	62.001	63.801	61.701	63.701	64.901	65.401	63.101	65.101	67.301	63.701	63.201	63.001	62.701	62.701	64.001	64.101	64.501	63.501	64.401	63.801	63.301	64.501	65.901	65.901	66.101	66.001	64.801
SP29-C2	63.001	64.601	64.001	62.101	62.601	62.901	63.501	63.001	63.401	64.801	63.801	64.201	63.001	64.801	63.501	63.601	62.801	63.301	61.701	63.301	63.701	62.901	62.701	65.001	63.101	63.501	64.501	63.801	63.601	65.301	63.801	58.401	63.001	63.001	64.001	64.201	63.701	64.601	63.701	64.501	64.101	64.401	65.501	65.601	66.101	66.701	66.101	67.601	65.401
P7-c22	61.201	62.901	61.801	61.001	61.801	62.001	63.201	63.001	63.101	63.401	63.101	62.901	63.401	63.101	62.201	62.701	63.901	63.101	63.901	61.301	61.501	62.701	61.901	64.001	62.701	62.301	64.701	63.701	62.901	65.201	65.001	63.601	64.901	63.501	63.601	64.301	64.401	64.501	65.401	62.801	63.901	64.201	65.201	63.601	65.601	66.801	65.001	65.801	65.401
SP16-C4	60.101	61.301	59.501	61.701	59.801	60.101	61.501	62.001	63.001	63.501	59.501	60.501	62.201	62.101	63.301	63.701	60.101	64.101	61.601	63.301	62.501	61.301	61.801	62.201	61.401	61.001	61.401	61.101	61.201	64.501	63.801	60.301	62.301	61.501	62.601	61.401	60.801	62.001	63.401	61.501	62.501	63.601	62.501	62.301	62.401	62.401	61.801	64.301	61.701
TTMDV15-Pt-TTMDV210	60.301	60.401	60.901	61.101	59.601	61.701	61.401	61.201	62.501	62.701	59.201	60.501	60.601	59.901	59.701	61.801	60.501	62.401	63.001	62.001	61.501	61.701	61.301	60.201	60.201	60.001	62.001	62.201	61.001	61.501	61.001	61.201	61.901	60.201	60.101	62.601	61.301	62.201	61.901	62.401	62.301	61.901	60.901	60.701	61.701	61.601	62.801	60.201	61.801
SP49-C1	61.901	61.101	61.601	61.601	59.101	61.801	59.701	60.801	62.501	60.801	60.901	60.901	63.701	61.701	62.401	63.801	60.501	63.401	62.001	61.301	61.101	60.101	60.401	61.901	60.901	62.701	60.101	63.601	61.001	60.501	61.301	60.801	60.301	61.401	61.201	62.001	61.101	61.301	59.401	62.201	63.201	62.701	62.701	62.201	61.501	61.501	62.201	62.101	61.101
[truncated: 36 more columns]
